# Supplementary material
Source: PubMed Central journal article supplement (PMC2929272)

# Total Synthesis of Fostriecin: Via a Regio- and Stereoselective Polyene Hydration, Oxidation and Hydroboration Sequence

Dong Gao and George A. O'Doherty\*

Department of Chemistry, West Virginia University

Morgantown, WV 26506

## Supporting Information:

### Table of Contents

| Page |                                                                                                                                          |
|------|------------------------------------------------------------------------------------------------------------------------------------------|
| S5   | General Methods and Materials                                                                                                            |
| S6   | Experimental Procedure for (( <i>E</i> )-pent-2-en-4-ynyloxy)( <i>tert</i> -butyl)dimethylsiane ( <b>A</b> ).                            |
| S6   | Experimental Procedure for ( <i>E</i> )- 5-(benzyl di methylsilyl)pent-2-en-4-ynyloxy)( <i>tert</i> -butyl)dimethylsilane ( <b>12</b> ). |
| S7   | Experimental Procedure for ( <i>E</i> )-5-(trimethylsilyl)pent-2-en-4-yn-1-ol ( <b>B</b> ). <sup>‡</sup>                                 |
| S8   | Experimental Procedure for ( <i>E</i> )-5-(trimethylsilyl)pent-2-en-4-ynal ( <b>13</b> ).                                                |
| S9   | Experimental Procedure for ( <i>2E</i> , <i>4E</i> )-ethyl-2-methyl-7-(trimethylsilyl)hepta-2,4-dien-6-ynoate ( <b>14a</b> ).            |
| S9   | Experimental Procedure for ( <i>2E</i> , <i>4E</i> )-2-methyl-7-(trimethylsilyl)hepta-2,4-dien-6-yn-1-ol ( <b>C</b> ). <sup>‡</sup>      |
| S10  | Experimental Procedure for ( <i>2E</i> , <i>4E</i> )-2-methyl-7-(trimethylsilyl)hepta-2,4-dien-6-ynal ( <b>15a</b> ).                    |
| S11  | Experimental Procedure for ( <i>2E,4E,6E</i> )-ethyl-4-methyl-9-(trimethylsilyl)nona-2,4,6-trien-8-ynoate ( <b>10</b> ).                 |

- S12 Experimental Procedure for (2*E*,4*E*,6*S*,7*S*)-ethyl-6,7-dihydroxy-4-methyl-9-(trimethylsilyl)nona-2,4-dien-8-ynoate (**D**).<sup>‡</sup>
- S13 Experimental Procedure for (2*E*,4*E*)-ethyl-4-methyl-((4*S*,5*S*)-5-(2-(trimethylsilyl)ethynyl)-2-oxo-1,3-dioxolan-4-yl)penta-2,4-dienoate (**16**).
- S14 Experimental Procedure for (*R*,2*E*,4*E*)-ethyl-7-*tert*-butyldimethylsiloxy-4-methyl-9-(trimethylsilyl)nona-2,4-dien-8-ynoate (**17**).
- S15 Experimental Procedure for (*E*,4*R*,5*R*,7*R*)-ethyl-4,5-dihydroxy-7-*tert*-butyldimethylsiloxy-4-methyl-9-(trimethyl silyl)non-2-en-8-ynoate (**E**).<sup>‡</sup>
- S16 Experimental Procedure for (*E*,4*R*,5*R*,7*R*)-ethyl-4,5-bistriethylsilyl-7-*tert*-butyldimethylsilyl-4-methyl-9-(trimethylsilyl)non-2-en-8-ynoate (**18**).
- S17 Experimental Procedure for (*E*,4*R*,5*R*,7*R*)-ethyl-4,5-bistriethylsilyl-7-*tert*-butyldimethylsilyl-4-methyl-9-non-2-en-8-ynoate (**19**).
- S18 Experimental Procedure for (2*E*,4*S*,5*R*,7*R*,8*Z*)-ethyl-7-*tert*-butyldimethylsiloxy-4-methyl-2,2,4-trimethyl-1',3'-dioxolan-4-yl)-9-(3,3,4,4-tetramethylborolan-1-yl)nona-2,8-dienoate (**23**).
- S19 Experimental Procedure for (2*E*,4*R*,5*R*,7*R*,8*Z*)-ethyl-4,5-bistriethylsilyl-7-*tert*-butyldimethylsilyl-4-methyl-9-(4,4,5,5-tetramethyl-1,3,2-dioxaborolan-2-yl)nona-2,8-dienoate (**25a**).
- S20 Experimental Procedure for (2*E*,4*R*,5*R*,7*R*,8*Z*)-4,5-bistriethylsilyl-7-*tert*-butyldimethylsilyl-4-methyl-9-(4,4,5,5-tetramethyl-1,3,2-dioxaborolan-2-yl)nona-2,8-dien-1-ol (**26a**).
- S21 Experimental Procedure for (2*E*,4*R*,5*R*,7*R*,8*Z*)-4,5-bistriethylsilyl-7-*tert*-butyldimethylsilyl-4-methyl-9-(4,4,5,5-tetramethyl-1,3,2-dioxaborolan-2-yl)nona-2,8-dienal (**27**).
- S22 Experimental Procedure for (1*Z*,3*R*,5*R*,6*R*,7*E*,9*R*)-4,5-bistriethylsilyl-7-

- tert*-butyldimethylsilyl-6-methyl-1-(4,4,5,5-tetramethyl-1,3,2-dioxaborolan-2-yl)dodeca-1,7,11-trien-1-ol (**29**).
- S23 Experimental Procedure for (4*R*,5*E*,7*R*,8*R*,10*R*,11*Z*)-7,8-bistriethylsilyl-10-*tert*-butyldimethylsilyl-7-methyl-12-(4,4,5,5-tetramethyl-1,3,2-dioxaborolan-2-yl)dodeca-1,5,11-trien-4-ylacrylate (**30**).
- S24 Experimental Procedure for (*R*)-5,6-dihydro-6-((1*E*,3*R*,4*R*,6*R*,7*Z*)-3,4-bistriethylsilyl-6-*tert*-butyldimethylsilyl-3-methyl-8-(4,4,5,5-tetramethyl-1,3,2-dioxaborolan-2-yl)octa-1,7-dienyl)pyran-2-one (**32**).
- S25 Experimental Procedure for (*R*)-5,6-dihydro-6-((1*E*,3*R*,4*R*,6*R*,7*Z*,9*Z*,11*E*)-3,4-bistriethylsilyl-6-*tert*-butyldimethyl silyl-13-*tert*-butyldiphenylsilyl-3-methyltrideca-1,7,9-11-tetraenyl)pyran-2-one (**33**).
- S26 Experimental Procedure for (*R*)-5,6-dihydro-6-((1*E*,3*R*,4*R*,6*R*,7*Z*,9*Z*,11*E*)-3,4-bistriethylsilyl-6-*tert*-butyldimethyl silyl-13-hydroxy-3-methyltrideca-1,7,9-11-tetraenyl)pyran-2-one (**34**) and (*R*)-5,6-dihydro-6-((1*E*,3*R*,4*R*,6*R*,7*Z*,9*Z*,11*E*)-3-triethylsilyl-6-*tert*-butyldimethyl silyl-4,13-dihydroxy-3-methyltrideca-1,7,9-11-tetraenyl)pyran-2-one (**35**).
- S29 Experimental Procedure for (*R*)-5,6-dihydro-6-((1*E*,3*R*,4*R*,6*R*,7*Z*,9*Z*,11*E*)-3-bistriethylsilyl-4-hydroxy-6-*tert*-butyldimethylsilyl-13-*tert*-butyldiphenylsilyl-3-methyltrideca-1,7,9-11-tetraenyl)pyran-2-one (**5**).
- S30 Experimental Procedure for Fostriecin (**1**).
- S32-S33 <sup>1</sup>H and <sup>13</sup>C NMR spectra of **A**
- S34-S35 <sup>1</sup>H and <sup>13</sup>C NMR spectra of **12**
- S36-S37 <sup>1</sup>H and <sup>13</sup>C NMR spectra of **B**
- S38-S39 <sup>1</sup>H and <sup>13</sup>C NMR spectra of **13**
- S40-S41 <sup>1</sup>H and <sup>13</sup>C NMR spectra of **14a**

|         |                                                              |
|---------|--------------------------------------------------------------|
| S42-S43 | <sup>1</sup> H and <sup>13</sup> C NMR spectra of <b>C</b>   |
| S44-S45 | <sup>1</sup> H and <sup>13</sup> C NMR spectra of <b>15a</b> |
| S46-S47 | <sup>1</sup> H and <sup>13</sup> C NMR spectra of <b>10</b>  |
| S48-S49 | <sup>1</sup> H and <sup>13</sup> C NMR spectra of <b>D</b>   |
| S50-S51 | <sup>1</sup> H and <sup>13</sup> C NMR spectra of <b>16</b>  |
| S52-S53 | <sup>1</sup> H and <sup>13</sup> C NMR spectra of <b>17</b>  |
| S54-S55 | <sup>1</sup> H and <sup>13</sup> C NMR spectra of <b>E</b>   |
| S56-S57 | <sup>1</sup> H and <sup>13</sup> C NMR spectra of <b>18</b>  |
| S58-S59 | <sup>1</sup> H and <sup>13</sup> C NMR spectra of <b>19</b>  |
| S60-S61 | <sup>1</sup> H and <sup>13</sup> C NMR spectra of <b>23</b>  |
| S62-S63 | <sup>1</sup> H and <sup>13</sup> C NMR spectra of <b>25a</b> |
| S64-S65 | <sup>1</sup> H and <sup>13</sup> C NMR spectra of <b>26a</b> |
| S66-S67 | <sup>1</sup> H and <sup>13</sup> C NMR spectra of <b>27</b>  |
| S68-S69 | <sup>1</sup> H and <sup>13</sup> C NMR spectra of <b>29</b>  |
| S70-S71 | <sup>1</sup> H and <sup>13</sup> C NMR spectra of <b>30</b>  |
| S72-S73 | <sup>1</sup> H and <sup>13</sup> C NMR spectra of <b>32</b>  |
| S74-S75 | <sup>1</sup> H and <sup>13</sup> C NMR spectra of <b>33</b>  |
| S76-S77 | <sup>1</sup> H and <sup>13</sup> C NMR spectra of <b>34</b>  |
| S78-S79 | <sup>1</sup> H and <sup>13</sup> C NMR spectra of <b>35</b>  |
| S80-S81 | <sup>1</sup> H and <sup>13</sup> C NMR spectra of <b>5</b>   |
| S82     | <sup>1</sup> H spectra of <b>1</b>                           |

**General Methods and Materials.**  $^1\text{H}$  and  $^{13}\text{C}$  NMR spectra were recorded on Jeol (270 MHz) and Varian VXR-600 (600 MHz) spectrometers. Chemical shifts are reported relative to internal tetramethylsilane ( $\delta$  0.00 ppm) or  $\text{CDCl}_3$  ( $\delta$  7.26 ppm) for  $^1\text{H}$  NMR and  $\text{CDCl}_3$  ( $\delta$  77.0 ppm) for  $^{13}\text{C}$  NMR. Infrared (IR) spectra were obtained on a Prospect MIDAC FT-IR spectrometer. Optical rotations were measured with a Jasco DIP-370 digital polarimeter in the solvent specified. Melting points were determined with Electrothermal Mel-Temp apparatus and are uncorrected. Flash column chromatography was performed on ICN reagent 60 (60-200 mesh) silica gel. Analytical thin-layer chromatography was performed with precoated glass-backed plates (Whatman K6F 60Å, F<sub>254</sub>) and visualized by quenching of fluorescence and by charring after treatment with *p*-anisaldehyde or phosphomolybdic acid or potassium permanganate stain.  $R_f$  values are obtained by elution in the stated solvent ratios (v/v). Ether, THF, methylene chloride and triethylamine were dried by passing through activated alumina (8 x 14 mesh) column with argon gas pressure. Commercial reagents were used without purification unless otherwise noted. Melting points are uncorrected. Air and/or moisture-sensitive reactions were carried out under an atmosphere of argon/nitrogen using oven/flamed-dried glassware and standard syringe/septa techniques.

**((E)-pent-2-en-4-ynoxy)(tert-butyl)dimethylsiane (A).<sup>‡</sup>**

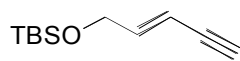

**A**

To a stirred solution of 2-penten-4-yn-1-ol **11** (10 g, 121.8 mmol) in 100 mL of CH<sub>2</sub>Cl<sub>2</sub> at room temperature was added Et<sub>3</sub>N (42.4 mL, 304.5 mmol), TBSCl (23.8 g, 158.4 mmol) and DMAP (0.73 g, 6.1 mmol). After 15 hours, the reaction was quenched with saturated sodium bicarbonate aqueous solution and the aqueous layer was extracted with CH<sub>2</sub>Cl<sub>2</sub>. The combined organic layers were washed with brine and dried over anhydrous sodium sulfate. After removal of the solvents *in vacuo*, flash chromatography on silica gel (9:1 (v/v) hexanes/EtOAc) afforded compound **A** as a viscous oil (22.7 g, 95% yield): *R*<sub>f</sub> = 0.59 (9:1 (v/v) hexane/EtOAc); IR (neat, cm<sup>-1</sup>) 2955, 1740, 1463; <sup>1</sup>H NMR (CDCl<sub>3</sub>, 270 MHz) δ 6.30 (ddd, *J* = 15.8, 4.0, 4.0 Hz, 1H), 5.75 (dddd, *J* = 15.8, 2.2, 2.2, 2.2 Hz, 1H), 4.23 (dd, *J* = 3.7, 2.5 Hz, 2H), 2.87 (d, *J* = 1.7 Hz, 1H), 0.91 (s, 9H), 0.69 (s, 6H); <sup>13</sup>C NMR (CDCl<sub>3</sub>, 67.5 MHz): δ 144.3, 107.5, 82.1, 77.3, 62.7, 25.8 (3C), 18.3, -5.4 (2C); HRMS (CI) calcd for [C<sub>11</sub>H<sub>20</sub>OSi + Na]<sup>+</sup>: 218.3522, Found: Sample was not charged well enough for electrospray. EI was not available.

**(E)- 5-(benzyl di methylsilyl)pent-2-en-4-ynoxy)(tert-butyl)dimethylsilane (12).**

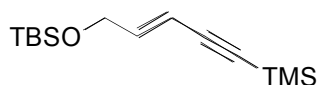

**12**

To a solution of alcohol **A** (25.1 g, 128.1 mmol) in 150 mL of THF was added *n*-BuLi (2.3 M in hexane, 65.0 mL, 149.5 mmol) at -78 °C. After 30 minutes, TMSCl (18.1 g, 166.4 mmol) was added dropwise. The mixture was stirred for 2 hours and quenched with saturated NH<sub>4</sub>Cl aqueous solution. The aqueous layer was extracted with EtOAc, the combined organic layers were washed with brine, dried over anhydrous sodium sulfate and the solvent was removed *in vacuo*. The crude product was purified by flash chromatography on silica gel (9:1 (v/v) hexane/EtOAc) to yield compound **12** (30.6 g, 89% yield) as a viscous oil. *R<sub>f</sub>* = 0.58 (9:1 (v/v) hexane/EtOAc); IR (neat, cm<sup>-1</sup>) 2980; <sup>1</sup>H NMR (CDCl<sub>3</sub>, 270 MHz) δ 6.25 (ddd, *J* = 15.8, 4.2, 4.0 Hz, 1H), 5.79 (ddd, *J* = 15.8, 2.2, 2.0 Hz, 1H), 4.21 (dd, *J* = 4.2, 2.2 Hz, 2H), 0.90 (s, 9H), 0.18 (s, 9H), 0.05 (s, 6H); <sup>13</sup>C NMR (CDCl<sub>3</sub>, 67.5 MHz): δ 143.6, 108.6, 103.6, 94.4, 62.7, 25.8 (3C), 18.3, -0.07 (3C), -5.4 (2C); HRMS (CI) calcd for [C<sub>14</sub>H<sub>20</sub>OSi<sub>2</sub> + Na]<sup>+</sup>: 282.4701 Found: Sample was not charged well enough for electrospray. EI was not available.

**(*E*)-5-(trimethylsilyl)pent-2-en-4-yn-1-ol (B).**<sup>‡</sup>

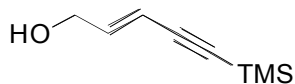

**B**

A mixture of 150 mL AcOH/H<sub>2</sub>O/THF : 3/1/1 was added to silyl acetylene **12** (26.8 g, 100.0 mmol) at room temperature. The reaction was stirred for 12 hours and quenched with saturated K<sub>2</sub>CO<sub>3</sub> aqueous solution. The aqueous layer was extracted with Et<sub>2</sub>O. The combined organic layers were washed with brine, dried over anhydrous Na<sub>2</sub>SO<sub>4</sub> and concentrated to afford the crude product. Flash chromatography on silica gel (8:2 (v/v)

hexane/EtOAc) provided compound **B** (13.2 g, 86% yield) as a colorless oil.  $R_f = 0.25$  (7:3 (v/v) hexane/EtOAc); IR (neat,  $\text{cm}^{-1}$ ) 3363, 2959, 1600, 1494;  $^1\text{H}$  NMR ( $\text{CDCl}_3$ , 270 MHz)  $\delta$  6.27 (ddd,  $J = 15.8, 5.2, 5.0$  Hz, 1H), 5.74 (ddd,  $J = 16.1, 2.0, 1.8$  Hz, 1H), 4.20 (dd,  $J = 4.4, 3.7$  Hz, 2H), 2.20 (bs, 1H), 0.17 (s, 9H);  $^{13}\text{C}$  NMR ( $\text{CDCl}_3$ , 67.5 MHz):  $\delta$  142.9, 110.2, 103.0, 95.2, 62.6, -0.17 (3C); HRMS (CI) calcd for  $[\text{C}_8\text{H}_{14}\text{OSi} + \text{Na}]^+$ : 176.2722, Found: Sample was not charged well enough for electrospray. EI was not available.

**(E)-5-(trimethylsilyl)pent-2-en-4-ynal (13).**

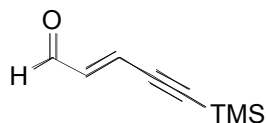

**13**

To a solution of alcohol **B** (10.4 g, 67.5 mmol) in 100 mL of  $\text{CH}_2\text{Cl}_2$  was added  $\text{MnO}_2$  (58.0 g, 672 mmol) at room temperature. After 16 hours, the reaction mixture was filtered through a pad of Celite. The filtrate was concentrated to afford the crude product. Flash chromatography on silica gel (9:1 (v/v) hexane/EtOAc) provided compound **13** (9.3 g, 91% yield) as a colorless oil.  $R_f = 0.23$  (9:1 (v/v) hexane/EtOAc); IR (neat,  $\text{cm}^{-1}$ ) 3369, 2989, 1680;  $^1\text{H}$  NMR ( $\text{CDCl}_3$ , 270 MHz)  $\delta$  9.54 (d,  $J = 7.2$ , Hz, 1H), 6.57 (d,  $J = 15.8$  Hz, 1H), 6.44 (dd,  $J = 15.8, 7.4$  Hz, 1H), 0.22 (s, 9H);  $^{13}\text{C}$  NMR ( $\text{CDCl}_3$ , 67.5 MHz)  $\delta$  193.1, 140.1, 132.1, 111.4, 100.6, -0.56 (3C); HRMS (CI) calcd for  $[\text{C}_8\text{H}_{12}\text{OSi} + \text{H}]^+$ : 153.0736, Found: 153.0730.



**(2E, 4E)-ethyl-2-methyl-7-(trimethylsilyl)hepta-2,4-dien-6-ynoate (14a).**

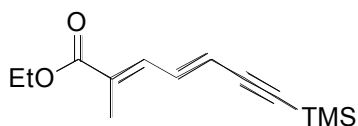

**14a**

To a solution of triethyl-2-phosphonopropionate (15.6 g, 65.7 mmol) in 200 mL of THF was added *n*-BuLi (2.3 M, 27.4 mL, 63.0 mmol) at  $-78\text{ }^{\circ}\text{C}$ . After stirring for 30 minutes, aldehyde **13** (8.32 g, 54.8 mmol) in 10 mL of THF was added dropwise. After 2 hours, the reaction was quenched with saturated  $\text{NH}_4\text{Cl}$  aqueous solution. The aqueous layer was extracted with EtOAc. The combined organic layers were washed with brine, dried over anhydrous  $\text{Na}_2\text{SO}_4$ , and concentrated to afford the crude product. Flash chromatography on silica gel (9:1 (v/v) hexane/EtOAc) provided compound **14a** (12.2 g, 91% yield) as a colorless oil.  $R_f = 0.32$  (9:1 (v/v) hexane/EtOAc); IR (neat,  $\text{cm}^{-1}$ ) 2986, 1708;  $^1\text{H}$  NMR ( $\text{CDCl}_3$ , 270 MHz)  $\delta$  7.14 (dd,  $J = 11.9, 1.2$  Hz, 1H), 6.90 (dd,  $J = 15.3, 11.9$  Hz, 1H), 5.90 (d,  $J = 15.3$  Hz, 1H), 4.20 (q,  $J = 7.2$ , 2H), 1.96 (d,  $J = 1.2$  Hz, 3H), 1.29 (t,  $J = 7.2$ , 3H), 0.19 (s, 9H);  $^{13}\text{C}$  NMR ( $\text{CDCl}_3$ , 67.5 MHz)  $\delta$  167.8, 137.4, 136.5, 129.9, 117.3, 103.9, 100.8, 60.8, 14.2, 12.9,  $-0.25$  (3C); HRMS (CI) calcd for  $[\text{C}_{13}\text{H}_{20}\text{O}_2\text{Si} + \text{H}]^+$ : 237.1311, Found: 237.1306.

**(2E, 4E)-2-methyl-7-(trimethylsilyl)hepta-2,4-dien-6-yn-1-ol (C).<sup>‡</sup>**

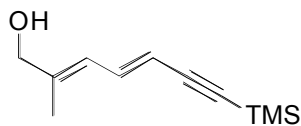

**C**

To a solution of ester **14a** (8.69 g, 36.8 mmol) in 100 mL of THF was added DIBAL-H (92.0 ml, 1.0 M in hexanes, 92.0 mmol) dropwise at  $-78\text{ }^{\circ}\text{C}$ . After 30 minutes, the reaction was quenched by adding 5 mL of acetone and 150 mL of 20% sodium potassium tartrate solution. The mixture was warmed to room temperature, diluted with ether (100 mL) and stirred for 1 hour. The aqueous layer was extracted with  $\text{Et}_2\text{O}$ . The combined organic layers were washed with brine and dried over anhydrous  $\text{Na}_2\text{SO}_4$ , and concentrated to afford the crude product. Flash chromatography on silica gel (8:2 (v/v) hexane/EtOAc) provided allylic alcohol **C** (6.66 g, 93% yield) as a colorless oil.  $R_f = 0.20$  (8:2 (v/v) hexane/EtOAc); IR (neat,  $\text{cm}^{-1}$ ) 3427, 2982;  $^1\text{H}$  NMR ( $\text{CDCl}_3$ , 270 MHz)  $\delta$  6.88 (dd,  $J = 15.3, 11.1$  Hz, 1H), 6.13-6.07 (m, 1H), 5.58 (d,  $J = 15.6$  Hz, 1H), 4.05 (s, 2H), 1.71 (d,  $J = 0.8$  Hz, 3H), 0.80 (s, 1H), 0.19 (s, 9H);  $^{13}\text{C}$  NMR ( $\text{CDCl}_3$ , 67.5 MHz)  $\delta$  141.0, 138.4, 123.4, 110.4, 104.8, 96.9, 67.7, 14.3,  $-0.10$  (3C); HRMS (CI) calcd for  $[\text{C}_{11}\text{H}_{18}\text{OSi} + \text{H}]^+$ : 195.1205, Found: 195.1216.

**(2E, 4E)-2-methyl-7-(trimethylsilyl)hepta-2,4-dien-6-ynal (15a).**

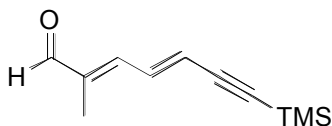

**15a**

To a solution of alcohol **C** (6.66 g, 34.3 mmol) in 80 mL of  $\text{CH}_2\text{Cl}_2$  was added  $\text{MnO}_2$  (29.9 g, 343.3 mmol) at room temperature. After 18 hours, the reaction mixture was filtered through a pad of Celite. The filtrate was concentrated to afford the crude product. Flash chromatography on silica gel (8:2 (v/v) hexane/EtOAc) provided compound **15a** (6.24 g, 94% yield) as a colorless oil.  $R_f = 0.64$  (8:2 (v/v) hexane/EtOAc); IR (neat,  $\text{cm}^{-1}$ )

3370, 2990, 1456;  $^1\text{H}$  NMR ( $\text{CDCl}_3$ , 270 MHz)  $\delta$  9.45 (s, 1H), 7.04 (dd,  $J = 15.3, 11.4$  Hz, 1H), 6.82 (d,  $J = 11.4$  Hz, 1H), 6.04 (d,  $J = 15.3$  Hz, 1H), 1.87 (d,  $J = 1.0$  Hz, 3H), 0.21 (s, 9H);  $^{13}\text{C}$  NMR ( $\text{CDCl}_3$ , 67.5 MHz)  $\delta$  194.4, 146.3, 139.5, 136.7, 119.5, 103.5, 103.0, 9.70, -0.31 (3C); HRMS (CI) calcd for  $[\text{C}_{19}\text{H}_{24}\text{O}_2\text{Si} + \text{Na}]^+$ : 335.1438, Found: 335.1439.

**(2E,4E,6E)-ethyl-4-methyl-9-(trimethylsilyl)nona-2,4,6-trien-8-ynoate (10).**

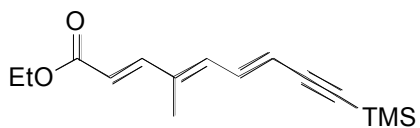

**10**

To a solution of aldehyde **15a** (5.57 g, 29.0 mmol) in 70 mL of toluene was added yield (13.1 g, 37.7 mmol), the mixture was refluxed for 5 hours. After cool it down to room temperature, the solvent was removed *in vacuo*. The crude product was purified by flash chromatography on silica gel (8:2 (v/v) hexane/EtOAc) provided compound **10** (7.15 g, 94% yield) as a colorless oil.  $R_f = 0.60$  (8:2 (v/v) hexane/EtOAc); IR (neat,  $\text{cm}^{-1}$ ) 2988, 1719;  $^1\text{H}$  NMR ( $\text{CDCl}_3$ , 270 MHz)  $\delta$  7.30 (d,  $J = 15.6$  Hz, 1H), 6.96 (dd,  $J = 15.3, 11.6$  Hz, 1H), 6.38 (d,  $J = 11.6$  Hz, 1H), 5.93 (d,  $J = 15.6$  Hz, 1H), 5.78 (d,  $J = 15.3$  Hz, 1H), 4.20 (q,  $J = 7.2$  Hz, 2H), 1.93 (d,  $J = 0.73$  Hz, 3H), 1.29 (t,  $J = 7.2$  Hz, 3H), 0.19 (s, 9H);  $^{13}\text{C}$  NMR ( $\text{CDCl}_3$ , 67.5 MHz)  $\delta$  167.0, 147.9, 137.9, 136.9, 136.1, 118.5, 114.9, 104.4, 100.1, 60.3, 14.3, 12.7, -0.20 (3C); HRMS (CI) calcd for  $[\text{C}_{15}\text{H}_{22}\text{O}_2\text{Si} + \text{Na}]^+$ : 285.1287, Found: 285.1281.

**(2*E*,4*E*,6*S*,7*S*)-ethyl-6,7-dihydroxy-4-methyl-9-(trimethylsilyl)nona-2,4-dien-8-ynoate (D).**<sup>‡</sup>

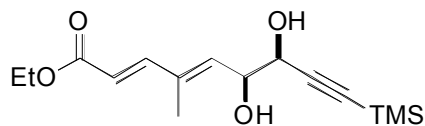

**D**

To a 500 mL round bottom flask was added *tert*-butyl alcohol (100 mL), H<sub>2</sub>O (100 mL), K<sub>3</sub>Fe(CN)<sub>6</sub> (26.8 g, 81.9 mmol), K<sub>2</sub>CO<sub>3</sub> (11.3 g, 81.9 mmol), KHCO<sub>3</sub> (8.24 g, 81.9 mmol), CH<sub>3</sub>SO<sub>2</sub>NH<sub>2</sub> (2.60 g, 27.3 mmol), (DHD)<sub>2</sub>-PHAL (420 mg, 0.55 mmol, 2 mol %) and OsO<sub>4</sub> (69 mg, 0.27 mmol, 1 mol %). The mixture was stirred at room temperature for 30 minutes and then cooled to 0 °C. To this solution was added trienoate **10** (7.15 g, 27.3 mmol) in 5 mL of CH<sub>2</sub>Cl<sub>2</sub> dropwise and the reaction was stirred vigorously at 0 °C overnight. Saturated aqueous sodium sulfite solution (50 mL) was added to quench the reaction while stirring vigorously. Ethyl acetate (60 mL) was added to the reaction mixture, the aqueous layer was further extracted with ethyl acetate (3 x 30 mL). The combined organic layers were washed with 2 N KOH (40 mL) and brine (20 mL) to remove the methanesulfonamide, dried over anhydrous Na<sub>2</sub>SO<sub>4</sub>, and concentrated to afford the crude product. Flash chromatography on silica gel (1:1 (v/v) hexane/EtOAc) provided the compound **D** (6.47 g, 80% yield). R<sub>f</sub> = 0.19 (9:1 (v/v) hexane/EtOAc); IR (neat, cm<sup>-1</sup>) 3446, 2983, 1762; [α]<sub>D</sub><sup>25</sup> +14° (c 1.0, CHCl<sub>3</sub>); <sup>1</sup>H NMR (CDCl<sub>3</sub>, 270 MHz) δ 6.88 (dd, *J* = 15.3, 11.1 Hz, 1H), 6.15 (d, *J* = 12.1 Hz, 1H), 5.62 (d, *J* = 15.6 Hz, 1H), 4.30-4.21 (m, 4H), 1.84 (s, 3H), 1.28 (t, *J* = 7.2 Hz, 3H), 0.18 (s, 9H); <sup>13</sup>C NMR (CDCl<sub>3</sub>, 67.5 MHz) δ 172.9, 139.3, 138.0, 125.4, 111.5, 104.5, 97.5, 76.7, 72.2, 62.2, 14.1, 13.8, -0.12 (3C); HRMS (CI) calcd for [C<sub>15</sub>H<sub>24</sub>O<sub>4</sub>Si + Na]<sup>+</sup>: 318.4254, Found: Sample was not

charged well enough for electrospray. EI was not available.

**(2*E*,4*E*)-ethyl-4-methyl-((4*S*,5*S*)-5-(2-(trimethylsilyl)ethynyl)-2-oxo-1,3-dioxolan-4-yl)penta-2,4-dienoate (16).**

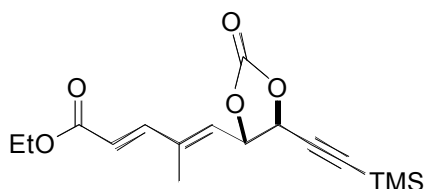

**16**

To a solution of diol **D** (4.81 g, 16.2 mmol) in 60 mL of CH<sub>2</sub>Cl<sub>2</sub> was added pyridine (4.68 mL, 56.9 mmol) and (Cl<sub>3</sub>CO)<sub>2</sub>CO (5.78 g, 19.5 mmol) in 10 mL of CH<sub>2</sub>Cl<sub>2</sub> at 0 °C. After 3 hours, the reaction was quenched by slow addition of saturated NH<sub>4</sub>Cl aqueous solution. The aqueous layer was extracted with Et<sub>2</sub>O. The combined organic layers were washed with brine, dried over anhydrous Na<sub>2</sub>SO<sub>4</sub>, and concentrated to afford the crude product. Flash chromatography on silica gel (9:1 (v/v) hexane/EtOAc) provided acetone **16** (4.76 g, 91% yield) as a colorless oil. *R*<sub>f</sub> = 0.61 (9:1 (v/v) hexane/EtOAc); IR (neat, cm<sup>-1</sup>) 2989, 1714; [α]<sub>D</sub><sup>25</sup> -80° (*c* 1.0, CHCl<sub>3</sub>); <sup>1</sup>H NMR (CDCl<sub>3</sub>, 270 MHz) δ 6.81 (dd, *J* = 15.6, 11.4 Hz, 1H), 6.21 (d, *J* = 11.4 Hz, 1H), 5.74 (d, *J* = 15.6 Hz, 1H), 5.02 (d, *J* = 5.2 Hz, 1H), 4.70 (d, *J* = 5.4 Hz, 1H), 4.32 (q, *J* = 7.2 Hz, 2H), 1.84 (s, 3H), 1.23 (t, *J* = 7.2 Hz, 3H), 0.19 (s, 9H); <sup>13</sup>C NMR (CDCl<sub>3</sub>, 67.5 MHz) δ 166.9, 153.1, 136.2, 132.4, 128.9, 115.0, 103.7, 99.7, 82.7, 75.9, 62.9, 14.0, 11.6, -0.23 (3C); HRMS (CI) calcd for [C<sub>16</sub>H<sub>22</sub>O<sub>5</sub>Si + H]<sup>+</sup>: 322.1317, Found: 333.1306.

**(*R,2E,4E*)-ethyl-7-*tert*-butyldimethylsiloxy-4-methyl-9-(trimethylsilyl)nona-2,4-dien-8-ynoate (**17**).**

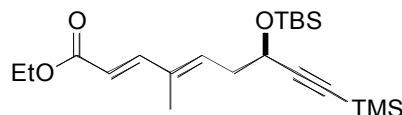

**17**

To a solution of carbonate **16** (103 mg, 0.32 mmol) in 5 mL of CH<sub>2</sub>Cl<sub>2</sub> was added Pd<sub>2</sub>(dba)<sub>3</sub>·CHCl<sub>3</sub> (7 mg, 0.007 mmol), PPh<sub>3</sub> (4 mg, 0.13 mmol), Et<sub>3</sub>N (98 mg, 0.97 mmol) and HCO<sub>2</sub>H (46 mg, 0.97 mmol) at room temperature. After 4 hours, the reaction mixture was quenched with saturated NH<sub>4</sub>Cl. aqueous solution. The organic layers were washed with brine, dried over anhydrous Na<sub>2</sub>SO<sub>4</sub>, and concentrated to afford the crude product. To a solution of the above crude alcohol in 0.5 mL of DMF was added imidazole (66 mg, 0.97 mmol) and TBSCl (72 mg, 0.48 mmol) at room temperature. After 0.5 hour, the reaction mixture was purified by flash chromatography on silica gel (8:2 (v/v) hexane/EtOAc) without work up to provide compound **17** (43 mg, 34% yield for two steps) as a colorless oil with 30% of the recovered starting material. R<sub>f</sub> = 0.36 (7:3 (v/v) hexane/EtOAc); IR (neat, cm<sup>-1</sup>) 2968, 1690; [α]<sub>D</sub><sup>25</sup> -20° (c 1.0, CHCl<sub>3</sub>); <sup>1</sup>H NMR (CDCl<sub>3</sub>, 270 MHz) δ 6.84 (dd, *J* = 15.3, 11.4 Hz, 1H), 5.92 (d, *J* = 11.4 Hz, 1H), 5.51 (d, *J* = 15.3 Hz, 1H), 4.27 (dd, *J* = 7.7, 4.7 Hz, 1H), 4.16 (q, *J* = 7.2 Hz, 2H), 2.49-2.41 (m, 2H), 1.83 (s, 3H), 1.27 (t, *J* = 6.6 Hz, 3H), 0.89 (s, 9H), 0.19 (s, 9H), 0.04 (s, 3H), 0.00 (s, 3H); <sup>13</sup>C NMR (CDCl<sub>3</sub>, 62.5 MHz) δ 173.2, 138.8 138.0, 128.0, 109.4, 105.0, 96.3, 71.4, 60.8, 45.6, 25.7 (3C), 18.2, 17.5, 14.2, -0.03 (3C), -5.1, -5.3; HRMS (CI) calcd for [C<sub>21</sub>H<sub>38</sub>O<sub>3</sub>Si<sub>2</sub> + Na]<sup>+</sup>: 416.6875, Found: Sample was not charged well enough for electrospray. EI was not available.

**(*E*,4*R*,5*R*,7*R*)-ethyl-4,5-dihydroxy-7-*tert*-butyldimethylsiloxy-4-methyl-9-(trimethylsilyl)non-2-en-8-ynoate (**E**).<sup>‡</sup>**

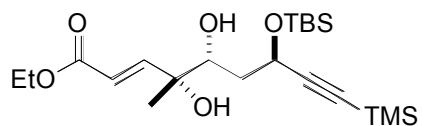

**E**

To a 100 mL round bottom flask was added *t*-butyl alcohol (20 mL), H<sub>2</sub>O (20 mL), K<sub>3</sub>Fe(CN)<sub>6</sub> (3.03 g, 9.22 mmol), K<sub>2</sub>CO<sub>3</sub> (1.27 g, 9.22 mmol), KHCO<sub>3</sub> (0.93 g, 9.22 mmol), CH<sub>3</sub>SO<sub>2</sub>NH<sub>2</sub> (0.29 g, 3.07 mmol), (DHQD)<sub>2</sub>-PHAL (99 mg, 0.13 mmol, 4 mol %) and OsO<sub>4</sub> (16 mg, 0.062 mmol, 2 mol %). The mixture was stirred at room temperature for 30 minutes and then cooled to 0 °C. To this solution was added dienoate **17** (1.18 g, 3.07 mmol) in 2 mL of CH<sub>2</sub>Cl<sub>2</sub> dropwise and the reaction was stirred vigorously at 0 °C for 8 hours. Saturated aqueous sodium sulfite solution (20 mL) was added to quench the reaction while stirring vigorously. Ethyl acetate (40 mL) was added to the reaction mixture, and after separation of the layers, the aqueous layer was further extracted with ethyl acetate (3 x 20 mL). The combined organic layers were washed with 2 N KOH (10 mL) and brine (20 mL) to remove the methanesulfonamide, dried over anhydrous Na<sub>2</sub>SO<sub>4</sub>, and concentrated to afford the crude product. Flash chromatography on silica gel (1:1 (v/v) hexane/EtOAc) provided the compound **E** (0.53 g, 40% yield). R<sub>f</sub> = 0.46 (1:1 (v/v) hexane/EtOAc); IR (neat, cm<sup>-1</sup>) 3446, 2983, 1762; [α]<sub>D</sub><sup>25</sup> +52° (*c* 1.0, CHCl<sub>3</sub>); <sup>1</sup>H NMR (CDCl<sub>3</sub>, 270 MHz) δ 7.01 (d, *J* = 15.8 Hz, 1H), 6.13 (d, *J* = 15.6 Hz, 1H), 4.73 (dd, *J* = 4.7, 4.5 Hz, 1H), 4.19 (q, *J* = 7.2 Hz, 2H), 4.06-4.02 (m, 1H), 3.64 (bs, 1H), 2.58 (s, 1H), 1.84-1.80 (m, 2H), 1.28 (t, *J* = 7.2 Hz, 3H), 1.26 (s, 3H), 0.88 (s, 9H), 0.16 (s, 12H), 0.15

(s, 3H);  $^{13}\text{C}$  NMR ( $\text{CDCl}_3$ , 67.5 MHz)  $\delta$  166.6, 152.3, 120.3, 105.5, 90.7, 74.7, 74.0, 62.5, 60.4, 37.6, 25.7 (3C), 22.6, 18.0, 14.2, -0.30 (3C), -4.6, -5.3; HRMS (CI) calcd for  $[\text{C}_{21}\text{H}_{40}\text{O}_5\text{Si}_2 + \text{Na}]^+$ : 451.2312, Found: 451.2307.

**(*E*,4*R*,5*R*,7*R*)-ethyl-4,5-bistriethylsilyl-7-*tert*-butyldimethylsilyl-4-methyl-9-(trimethylsilyl)non-2-en-8-ynoate (**18**).**

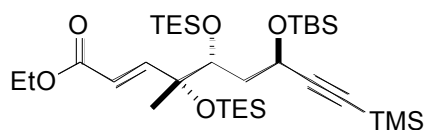

**18**

To a solution of diol **E** (43 mg, 0.10 mmol) in 1 mL of  $\text{CH}_2\text{Cl}_2$  was added 2,6-lutidine (0.12 mL, 1.0 mmol) and TESOTf (0.14 mL, 0.6 mmol) at  $-78\text{ }^\circ\text{C}$ . Then the reaction was warmed up to  $-10\text{ }^\circ\text{C}$  for 2 hours and quenched with saturated  $\text{NH}_4\text{Cl}$  aqueous solution. The aqueous layer was extracted with  $\text{Et}_2\text{O}$ . The combined organic layers were washed with brine, dried over anhydrous  $\text{Na}_2\text{SO}_4$ , and concentrated to afford the crude product. Flash chromatography on silica gel (8:2 (v/v) hexane/ $\text{EtOAc}$ ) provided compound **18** (54 mg, 82% yield) as a colorless oil.  $R_f = 0.52$  (9:1 (v/v) hexane/ $\text{EtOAc}$ ); IR (neat,  $\text{cm}^{-1}$ ) 2986, 1752;  $[\alpha]_D^{25} +14^\circ$  (c 1.0,  $\text{CHCl}_3$ );  $^1\text{H}$  NMR ( $\text{CDCl}_3$ , 270 MHz):  $\delta$  7.00 (d,  $J = 15.8$  Hz, 1H), 5.97 (d,  $J = 15.6$  Hz, 1H), 4.47 (dd,  $J = 7.7, 7.2$  Hz, 1H), 4.20 (q,  $J = 7.2$  Hz, 2H), 3.73 (dd,  $J = 5.9, 5.9$  Hz, 1H), 1.98-1.88 (m, 1H), 1.59-1.49 (m, 1H), 1.49 (s, 3H), 1.28 (t,  $J = 7.2$  Hz, 3H), 0.97 (t,  $J = 7.9$  Hz, 9H), 0.93 (t,  $J = 7.9$  Hz, 9H), 0.88 (s, 9H), 0.65 (q,  $J = 7.9$  Hz, 6H), 0.52 (q,  $J = 7.9$  Hz, 6H), 0.15 (s, 9H), 0.13 (s, 3H), 0.10 (s, 3H);  $^{13}\text{C}$  NMR ( $\text{CDCl}_3$ , 67.5 MHz)  $\delta$  166.7, 152.1, 120.0, 108.2, 89.1, 78.7, 76.0, 60.8, 60.2, 43.6, 25.9 (3C), 25.3, 18.2, 14.2, 7.20 (3C), 6.98 (3C), 6.88 (3C), 5.39 (3C), -0.26 (3C),



-4.1, -4.4; HRMS (CI) calcd for  $[C_{33}H_{68}O_5Si_4 + Na]^+$ : 679.4042, Found: 679.4037.

**(*E,4R,5R,7R*)-ethyl-4,5-bistriethylsilyl-7-*tert*-butyldimethylsilyl-4-methyl-9-non-2-en-8-ynoate (**19**).**

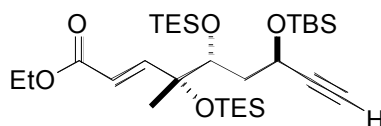

**19**

To a solution of silyl ester **18** (315 mg, 0.48 mmol) in 5 mL of EtOH was added  $K_2CO_3$  (199 mg, 1.48 mmol) at room temperature. After 24 hours, the reaction was quenched by adding 3 mL of 1 M  $NaHSO_4$  and diluted with EtOAc. The aqueous layer was extracted with  $Et_2O$ . The combined organic layers were washed with brine, dried over anhydrous  $Na_2SO_4$ , and concentrated to afford the crude product. Flash chromatography on silica gel (9:1 (v/v) hexane/EtOAc) provided allylic alcohol **19** (258 mg, 92% yield) as a colorless oil.  $R_f = 0.44$  (9:1 (v/v) hexane/EtOAc); IR (neat,  $cm^{-1}$ ) 2989, 1752;  $[\alpha]_D^{25} +17^\circ$  ( $c$  1.0,  $CHCl_3$ );  $^1H$  NMR ( $CDCl_3$ , 270 MHz):  $\delta$  7.01 (d,  $J = 15.8$  Hz, 1H), 5.96 (d,  $J = 15.8$  Hz, 1H), 4.48 (ddd,  $J = 8.2, 6.2, 2.0$  Hz, 1H), 4.20 (q,  $J = 7.2$  Hz, 2H), 3.74 (dd,  $J = 6.4, 5.7$  Hz, 1H), 2.39 (d,  $J = 2.2$  Hz, 1H), 1.99 (ddd,  $J = 13.9, 8.2, 5.4$  Hz, 1H), 1.60-1.51 (m, 1H), 1.39 (s, 3H), 1.29 (t,  $J = 7.2$  Hz, 3H), 0.97 (t,  $J = 7.9$  Hz, 18H), 0.89 (s, 9H), 0.64 (q,  $J = 7.9$  Hz, 12H), 0.14 (s, 3H), 0.11 (s, 3H);  $^{13}C$  NMR ( $CDCl_3$ , 67.5 MHz)  $\delta$  166.6, 152.0, 120.1, 86.1, 78.5, 76.0, 72.8, 60.3, 60.1, 43.6, 25.8 (3C), 25.3, 18.2, 14.3, 7.19 (3C), 6.98 (3C), 6.86 (3C), 5.43 (3C), -4.10, -4.48; HRMS (CI) calcd for  $[C_{30}H_{60}O_5Si_3 + Na]^+$ : 607.3646, Found: 607.3643.

**(*2E,4S,5R,7R,8Z*)-ethyl-7-*tert*-butyldimethylsilyloxy-4-methyl-2,2,4-trimethyl-1',3'-**

**dioxolan-4-yl)-9-(3,3,4,4-tetramethylborolan-1-yl)nona-2,8-dienoate (23).**

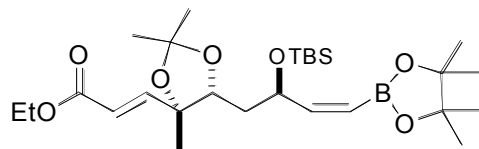

**23**

To a solution of  $[\text{Rh}(\text{COD})\text{Cl}]_2$  (8 mg, 0.017 mmol) in 1 mL of cyclohexane was added  $\text{P}^i\text{Pr}_3$  (11 mL, 0.068 mmol),  $\text{Et}_3\text{N}$  (38 mg, 0.37 mmol) and catecholborane (39 mg, 0.32 mmol) at room temperature. After being stirred at room temperature for 30 minutes, alkyne **22** (132 mg, 0.034 mmol) in 1 mL of cyclohexane was added. After 6 hours, pinacol (60 mg, 0.51 mmol) in 1 mL of cyclohexane was added dropwise and the resulting mixture was stirred for another 12 hours. The reaction was quenched with saturated  $\text{NH}_4\text{Cl}$  aqueous solution and the aqueous layer was extracted with  $\text{Et}_2\text{O}$ . The combined organic layers were washed with brine, dried over anhydrous  $\text{Na}_2\text{SO}_4$ , and concentrated to afford the crude product. Flash chromatography on silica gel (9:1 (v/v) hexane/ $\text{EtOAc}$ ) provided compound **23** (119 mg, 70% yield) as a colorless oil.  $R_f = 0.24$  (9:1 (v/v) hexane/ $\text{EtOAc}$ ); IR (neat,  $\text{cm}^{-1}$ ) 2986, 1758;  $[\alpha]_D^{25} -0.03^\circ$  ( $c$  1.0,  $\text{CHCl}_3$ );  $^1\text{H}$  NMR ( $\text{CDCl}_3$ , 270 MHz): 6.86 (d,  $J = 15.6$  Hz, 1H), 6.30 (dd,  $J = 13.6, 8.4$  Hz, 1H), 6.05 (d,  $J = 15.6$  Hz, 1H), 5.32 (dd,  $J = 13.6, 0.75$  Hz, 1H), 5.02 (ddd,  $J = 8.6, 8.6, 3.9$  Hz, 1H), 4.18 (q,  $J = 7.2$  Hz, 2H), 4.00 (dd,  $J = 8.9, 3.2$  Hz, 1H), 1.52 (ddd,  $J = 8.4, 4.2, 4.2$  Hz, 2H), 1.43 (s, 3H), 1.33 (s, 3H), 1.27 (t,  $J = 7.2$  Hz, 3H), 1.25 (s, 12H), 1.15 (s, 3H), 0.83 (s, 9H), 0.03 (s, 3H), 0.00 (s, 3H);  $^{13}\text{C}$  NMR ( $\text{CDCl}_3$ , 67.5 MHz)  $\delta$  166.4, 157.2, 149.7, 120.0, 107.8, 83.1, 81.4, 77.7, 69.3, 60.4, 37.7, 28.4, 26.4, 25.8 (3C), 24.8 (2C), 24.7 (2C), 21.1, 20.0, 18.1, 14.2, -4.40, -4.95; HRMS (CI) calcd for  $[\text{C}_{27}\text{H}_{49}\text{BO}_7\text{Si} + \text{Na}]^+$ : 547.3238, Found: 547.3234.

**(2E,4R,5R,7R,8Z)-ethyl-4,5-bistriethylsilyl-7-tert-butyl dimethylsilyl-4-methyl-9-(4,4,5,5-tetramethyl-1,3,2-dioxaborolan-2-yl)nona-2,8-dienoate (25a).**

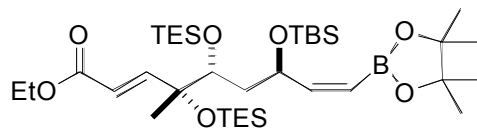

**25a**

To a solution of  $[\text{Rh}(\text{COD})\text{Cl}]_2$  (20 mg, 0.04 mmol) in 3 mL of cyclohexane was added  $\text{P}^i\text{Pr}_3$  (0.032 mL, 0.26 mmol),  $\text{Et}_3\text{N}$  (0.12 mL, 0.83 mmol) and catecholborane (86 mg, 0.71 mmol) at room temperature. After being stirred at room temperature for 30 minutes, alkyne **19** (438 mg, 0.72 mmol) in 1 mL of cyclohexane was added. After 8 hours, pinacol (133 mg, 1.13 mmol) in 1 mL of cyclohexane was added dropwise and the resulting mixture was stirred for 12 hours at room temperature. The reaction was quenched with saturated  $\text{NH}_4\text{Cl}$  aqueous solution. The aqueous layer was extracted with  $\text{Et}_2\text{O}$ . The combined organic layers were washed with brine, dried over anhydrous  $\text{Na}_2\text{SO}_4$ , and concentrated to afford the crude product. Flash chromatography on silica gel (9:1 (v/v) hexane/ $\text{EtOAc}$ ) provided compound **25a** (407 mg, 79% yield) as a colorless oil.  $R_f = 0.35$  (9:1 (v/v) hexane/ $\text{EtOAc}$ ); IR (neat,  $\text{cm}^{-1}$ ) 2986, 1758;  $[\alpha]_D^{25} +24^\circ$  ( $c$  1.0,  $\text{CHCl}_3$ );  $^1\text{H}$  NMR ( $\text{CDCl}_3$ , 270 MHz):  $\delta$  7.03 (d,  $J = 15.8$  Hz, 1H), 6.19 (dd,  $J = 13.9, 8.9$  Hz, 1H), 5.91 (d,  $J = 15.6$  Hz, 1H), 5.30 (d,  $J = 13.6$  Hz, 1H), 4.78 (td,  $J = 9.4, 3.7$  Hz, 1H), 4.21-4.14 (m, 2H), 3.76 (dd,  $J = 8.1, 1.7$  Hz, 1H), 2.14-2.05 (m, 1H), 1.87-1.79 (m, 1H), 1.36 (s, 3H), 1.26 (s, 12 H), 1.28 (t,  $J = 7.2$  Hz, 3H), 0.96 (dt,  $J = 8.2, 7.7$  Hz, 18H), 0.86 (s, 9H), 0.73-0.56 (m, 12H), 0.06 (s, 3H), 0.00 (s, 3H);  $^{13}\text{C}$  NMR ( $\text{CDCl}_3$ , 67.5 MHz)

$\delta$  166.9, 157.7, 153.0, 119.7, 83.2, 78.2, 75.4, 69.0, 60.2, 42.0, 26.9 (3C), 25.9 (2C), 24.9 (2C), 24.6, 24.2, 21.2, 17.9, 14.2, 7.20 (3C), 7.11 (3C), 6.74 (3C), 5.60 (3C), -3.00, -3.99; HRMS (CI) calcd for  $[\text{C}_{36}\text{H}_{73}\text{BO}_7\text{Si}_3 + \text{Na}]^+$ : 735.4655, Found: 735.4648.

**(2E,4R,5R,7R,8Z)-4,5-bistriethylsilyl-7-tert-butyl-dimethylsilyl-4-methyl-9-(4,4,5,5-tetramethyl-1,3,2-dioxaborolan-2-yl)nona-2,8-dien-1-ol (26a).**

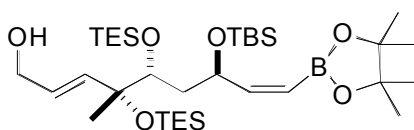

**26a**

To a solution of ester **25** (140 mg, 0.20 mmol) in 2 mL of THF was added DIBAL-H (0.45 mL, 1.0 M in hexanes, 0.45 mmol) dropwise at  $-78$  °C. After 20 minutes, the reaction was quenched by adding 0.5 mL of acetone and 10 mL of 20% sodium potassium tartrate solution. The mixture was warmed to room temperature, diluted with ether (10 mL) and stirred for 1 hour. The aqueous layer was extracted with  $\text{Et}_2\text{O}$ . The combined organic layers were washed with brine, dried over anhydrous  $\text{Na}_2\text{SO}_4$ , and concentrated to afford the crude product. Flash chromatography on silica gel (8:2 (v/v) hexane/EtOAc) provided allylic alcohol **26a** (123 mg, 92% yield) as a colorless oil.  $R_f = 0.33$  (8:2 (v/v) hexane/EtOAc); IR (neat,  $\text{cm}^{-1}$ ) 3427, 2982;  $[\alpha]_D^{25} +4^\circ$  ( $c$  1.0,  $\text{CHCl}_3$ );  $^1\text{H}$  NMR ( $\text{CDCl}_3$ , 270 MHz)  $\delta$  6.19 (dd,  $J = 13.9, 8.9$  Hz, 1H), 5.77-5.74 (m, 2H), 5.31 (d,  $J = 13.9$  Hz, 1H), 4.76 (td,  $J = 9.4, 4.2$  Hz, 1H), 4.15 (bs, 2H), 3.76 (dd,  $J = 7.4, 2.0$  Hz, 1H), 1.82 (ddd,  $J = 14.1, 9.4, 2.2$  Hz, 1H), 1.30 (s, 3H), 1.27 (s, 6 H), 1.26 (s, 6 H), 0.96 (dt,  $J = 8.2, 7.7$  Hz, 18H), 0.86 (s, 9H), 0.72-0.53 (m, 12H), 0.07 (s, 3H), 0.01 (s, 3H);  $^{13}\text{C}$  NMR ( $\text{CDCl}_3$ , 67.5 MHz)  $\delta$  157.8, 137.1, 128.1, 83.3 (3C), 77.9, 75.8, 69.4, 63.8,

42.4, 26.1 (3C), 25.0 (2C), 24.7 (2C), 23.4, 18.3, 7.34 (3C), 7.24 (3C), 6.86 (3C), 5.71 (3C), -2.89, -3.94; HRMS (CI) calcd for  $[C_{34}H_{71}BO_6Si_3 + Na]^+$ : 693.4549, Found: 693.4544.

**(2E,4R,5R,7R,8Z)-4,5-bistriethylsilyl-7-tert-butyl dimethylsilyl-4-methyl-9-(4,4,5,5-tetramethyl-1,3,2-dioxaborolan-2-yl)nona-2,8-dienal (27).**

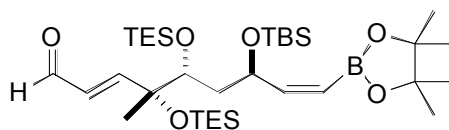

**27**

To a solution of alcohol **26** (30 mg, 0.045 mmol) in 1 mL of  $CH_2Cl_2$  was added  $MnO_2$  (39 mg, 0.45 mmol) at room temperature. After 5 hours, the reaction mixture was filtered through a pad of Celite. The filtrate was concentrated to afford the crude product. Flash chromatography on silica gel (9:1 (v/v) hexane/EtOAc) provided compound **27** (25 mg, 78% yield) as a colorless oil.  $R_f = 0.45$  (9:1 (v/v) hexane/EtOAc); IR (neat,  $cm^{-1}$ ) 3427, 2982, 1680;  $[\alpha]_D^{25} +43^\circ$  ( $c$  1.0,  $CHCl_3$ );  $^1H$  NMR ( $CDCl_3$ , 270 MHz)  $\delta$  9.56 (d,  $J = 7.9$  Hz, 1H), 6.92 (d,  $J = 15.6$  Hz, 1H), 6.25 (dd,  $J = 15.6, 7.9$  Hz, 1H), 6.18 (dd,  $J = 13.9, 9.2$  Hz, 1H), 5.31 (d,  $J = 13.9$  Hz, 1H), 4.76 (td,  $J = 9.6, 3.7$  Hz, 1H), 3.83 (dd,  $J = 8.4, 1.5$  Hz, 1H), 1.88 (ddd,  $J = 14.3, 10.2, 2.4$  Hz, 1H), 1.42 (s, 3H), 1.26 (s, 12H), 0.98 (t,  $J = 8.2$  Hz, 9H), 0.95 (t,  $J = 7.4$  Hz, 9H), 0.87 (s, 9H), 0.76-0.56 (m, 12H), 0.07 (s, 3H), 0.02 (s, 3H);  $^{13}C$  NMR ( $CDCl_3$ , 67.5 MHz)  $\delta$  194.0, 162.7, 157.5, 130.7, 83.2, 78.3, 75.5, 68.8, 41.8, 26.1 (3C), 24.9, 24.6, 18.2, 7.21 (3C), 7.12 (3C), 6.79 (3C), 5.61 (3C), -2.91, -3.91; HRMS (CI) calcd for  $[C_{34}H_{69}BO_6Si_3 + Na]^+$ : 691.4393, Found: 691.4387.

**(1*Z*,3*R*,5*R*,6*R*,7*E*,9*R*)-4,5-bistriethylsilyl-7-*tert*-butyldimethylsilyl-6-methyl-1-(4,4,5,5-tetramethyl-1,3,2-dioxaborolan-2-yl)dodeca-1,7,11-trien-1-ol (29).**

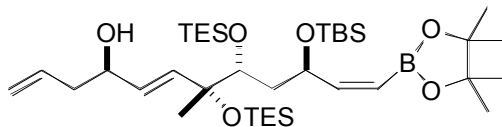

**29**

To a solution of (*S,S*)-**28** (102 mg, 0.19 mmol) in 0.5 mL of CH<sub>2</sub>Cl<sub>2</sub> was added aldehyde **173** (42 mg, 0.063 mmol) in 0.4 mL of CH<sub>2</sub>Cl<sub>2</sub> dropwise at -10 °C. The reaction flask was put in a freezer (-10 °C). After 24 hours, the reaction was diluted with EtOAc and quenched by adding 1 N NaHSO<sub>4</sub>, and the mixture was vigorously stirred at room temperature for 1 h. The mixture was filtered through a pad of Celite and the layers were separated. The aqueous layer was extracted with EtOAc. The combined organic layers were washed with brine, dried over anhydrous Na<sub>2</sub>SO<sub>4</sub>, and concentrated to afford the crude product. Flash chromatography on silica gel (9:1 (v/v) hexane/EtOAc) provided compound **29** (38 mg, 85% yield) as a light yellow oil.  $R_f = 0.30$  (9:1 (v/v) hexane/EtOAc); IR (neat, cm<sup>-1</sup>) 3450, 2981, 1755;  $[\alpha]_D^{25} +9^\circ$  (*c* 1.0, CHCl<sub>3</sub>); <sup>1</sup>H NMR (CDCl<sub>3</sub>, 270 MHz): δ 6.19 (dd, *J* = 13.8, 9.2 Hz, 1H), 5.87-5.73 (m, 2H), 5.60 (dd, *J* = 15.8, 6.2 Hz, 1H), 5.30 (d, *J* = 13.9 Hz, 1H), 5.16-5.09 (m, 2H), 4.76 (td, *J* = 9.4, 3.7 Hz, 1H), 4.18 (dd, *J* = 6.2, 5.9 Hz, 1H), 3.71 (dd, *J* = 7.7, 1.5 Hz, 1H), 2.37-2.25 (M, 2H), 1.83 (ddd, *J* = 14.1, 9.6, 1.7 Hz, 1H), 1.10-1.21 (m, 1H), 1.30 (s, 3H), 1.26 (s, 6H), 1.25 (s, 6H), 0.97 (t, *J* = 8.2 Hz, 9H), 0.95 (t, *J* = 7.4 Hz, 9H), 0.87 (s, 9H), 0.69 (q, *J* = 8.2 Hz, 6H), 0.58 (q, *J* = 7.9 Hz, 6H), 0.08 (s, 3H), 0.01 (s, 3H); <sup>13</sup>C NMR (CDCl<sub>3</sub>, 67.5 MHz) δ 157.8, 135.9, 134.3, 131.1, 118.0, 83.1, 77.8, 75.7, 71.6, 69.3, 42.3, 41.7 (3C), 26.0 (3C),

24.9 (2C), 24.6 (2C), 23.5, 18.2, 7.27 (3C), 7.16 (3C), 6.76 (3C), 5.63 (3C), -2.93, -4.05;  
HRMS (CI) calcd for  $[C_{37}H_{75}BO_6Si_3 + Na]^+$ : 733.4862, Found: 733.4855.

**(4*R*,5*E*,7*R*,8*R*,10*R*,11*Z*)-7,8-bistriethylsilyl-10-*tert*-butyldimethylsilyl-7-methyl-12-(4,4,5,5-tetramethyl-1,3,2-dioxaborolan-2-yl)dodeca-1,5,11-trien-4-ylacrylate (30).**

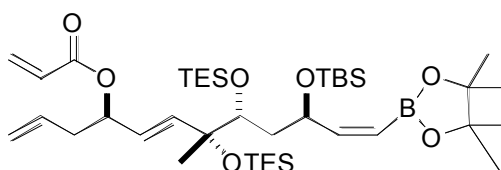

**30**

To a solution of alcohol **29** (30 mg, 0.043 mmol) in 1.5 mL of  $CH_2Cl_2$  was added acrylic acid (15 mg, 0.21 mmol), DCC (43 mg, 0.21 mmol) and DMAP (2 mg, 0.4 mmol %). After 3 hours, the reaction mixture was diluted with  $Et_2O$  and filtered through a pad of Celite and washed with  $Et_2O$ . The organic layer was washed with saturated aqueous  $NaHSO_4$  solution, brine and dried over anhydrous  $Na_2SO_4$ , concentrated to afford the crude product. Flash chromatography on silica gel (9:1 (v/v) hexane/ $EtOAc$ ) provided ester **30** (25 mg, 76% yield) as a colorless oil.  $R_f$  = 0.50 (8:2 (v/v) hexane/ $EtOAc$ ); IR (neat,  $cm^{-1}$ ) 2987, 1736;  $[\alpha]_D^{25} +10^\circ$  ( $c$  1.0,  $CHCl_3$ );  $^1H$  NMR ( $CDCl_3$ , 600 MHz)  $\delta$  6.37 (dd,  $J$  = 17.4, 1.2 Hz, 1H), 6.18 (dd,  $J$  = 13.8, 9.0 Hz, 1H), 6.09 (dd,  $J$  = 17.4, 10.2 Hz, 1H), 5.80 (dd,  $J$  = 15.6, 10.8 Hz, 2H), 5.76-5.70 (m, 1H), 5.59 (dd,  $J$  = 15.6, 6.6 Hz, 1H), 5.41 (dd,  $J$  = 6.6, 6.0 Hz, 1H), 5.29 (d,  $J$  = 13.8 Hz, 1H), 5.08-5.03 (m, 2H), 3.96 (dt,  $J$  = 9.6, 3.6 Hz, 1H), 3.70 (dd,  $J$  = 7.8, 1.2 Hz, 1H), 3.21-3.17 (m, 1H), 2.42 (dd,  $J$  = 6.6, 6.6 Hz, 1H), 1.92-1.90 (m, 1H), 1.75-1.73 (m, 1H), 1.29 (s, 3H), 1.26 (s, 6H), 1.25 (s, 6H), 0.96 (t,  $J$  = 7.8 Hz, 9H), 0.92 (t,  $J$  = 8.4 Hz, 9H), 0.87 (s, 9H), 0.67 (qd,  $J$  = 7.8, 2.4 Hz,

6H), 0.56 (q,  $J = 7.8$  Hz, 6H), 0.07 (s, 3H), 0.01 (s, 3H);  $^{13}\text{C}$  NMR ( $\text{CDCl}_3$ , 150 MHz)  $\delta$  165.2, 157.9, 137.8, 133.2, 130.2, 128.8, 126.6, 117.9, 83.1, 77.8, 75.7, 73.4, 69.1, 55.7, 42.2, 39.1, 34.9 (3C), 26.1, 25.5 (3C), 24.9 (2C), 24.7 (2C), 24.6, 18.2, 7.23 (3C), 7.12 (3C), 6.79 (3C), 5.65 (3C), -2.92, -4.07; HRMS (CI) calcd for  $[\text{C}_{40}\text{H}_{77}\text{BO}_7\text{Si}_3 + \text{Na}]^+$ : 787.4968, Found: 787.4961.

**(*R*)-5,6-dihydro-6-((1*E*,3*R*,4*R*,6*R*,7*Z*)-3,4-bis(triethylsilyl)-6-*tert*-butyldimethylsilyl-3-methyl-8-(4,4,5,5-tetramethyl-1,3,2-dioxaborolan-2-yl)octa-1,7-dienyl)pyran-2-one (32).**

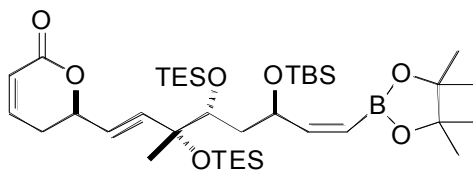

**32**

To a solution of triene **30** (25 mg, 0.032 mmol) in 3.5 mL of  $\text{CH}_2\text{Cl}_2$  was added Grubbs catalyst **31** (6 mg, 20 %mmol). The reaction was heated at reflux for 3 hours. Solvent was removed under reduced pressure and the residue was purified by flash chromatography on silica gel (8:2 (v/v) hexane/EtOAc) to provide lactone **32** (20 mg, 82% yield) as a colorless oil.  $R_f = 0.35$  (8:2 (v/v) hexane/EtOAc); IR (neat,  $\text{cm}^{-1}$ ) 2930, 1731;  $[\alpha]_D^{25} +32^\circ$  ( $c$  1.0,  $\text{CHCl}_3$ );  $^1\text{H}$  NMR ( $\text{CDCl}_3$ , 600 MHz)  $\delta$  6.86 (ddd,  $J = 8.4, 3.6, 1.2$  Hz, 1 H), 6.20 (dd,  $J = 13.8, 9.6$  Hz, 1H), 6.04 (ddd,  $J = 9.6, 1.8, 1.8$  Hz, 1H), 5.91 (dd,  $J = 15.6, 1.2$  Hz, 1H), 5.72 (dd,  $J = 15.6, 6.0$  Hz, 1H), 5.30 (dd,  $J = 13.8, 1.2$  Hz, 1H), 4.92 (ddd,  $J = 6.6, 6.0, 1.2$  Hz, 1H), 4.79 (dd,  $J = 9.6, 3.6$  Hz, 1H), 3.72 (dd,  $J = 9.6, 1.8$  Hz, 1H), 2.43-2.41 (m, 2H), 1.84 (ddd,  $J = 14.4, 10.2, 1.8$  Hz, 1H), 1.33 (s, 3H), 1.27 (s, 6H), 1.26 (s, 6H), 1.05 (m, 1H), 0.97 (dd,  $J = 8.4, 7.8$  Hz, 9H), 0.92 (dd,  $J = 8.4, 7.8$  Hz,



9H), 0.87 (s, 9H), 0.67 (qd,  $J = 8.4, 4.2$  Hz, 6H), 0.59 (q,  $J = 7.8$  Hz, 6H), 0.08 (s, 3H), 0.02 (s, 3H);  $^{13}\text{C}$  NMR ( $\text{CDCl}_3$ , 150 MHz)  $\delta$  164.0, 157.8, 144.4, 138.9, 125.5, 121.7, 83.2, 77.9, 77.7, 75.6, 69.1, 42.1, 29.8 (3C), 26.1 (3C), 24.9 (2C), 24.6 (2C), 24.4, 18.2, 7.25 (3C), 7.18 (3C), 6.87 (3C), 5.67 (3C), -2.94, -3.98; HRMS (CI) calcd for  $[\text{C}_{38}\text{H}_{73}\text{BO}_7\text{Si}_3 + \text{Na}]^+$ : 759.4655, Found: 759.4648.

**(*R*)-5,6-dihydro-6-((1*E*,3*R*,4*R*,6*R*,7*Z*,9*Z*,11*E*)-3,4-bistriethylsilyl-6-*tert*-butyldimethylsilyl-13-*tert*-butyldiphenylsilyl-3-methyltrideca-1,7,9-11-tetraenyl)pyran-2-one (33).**

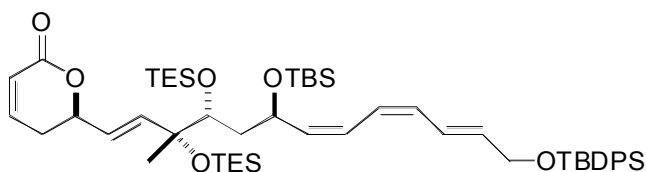

**33**

To a solution of  $\text{Pd}_2(\text{dba})_3\cdot\text{CHCl}_3$  (2 mg, 0.0019 mmol) in 0.5 mL of THF was added  $\text{PPh}_3$  (4mg, 0.015 mmol). The color changed from dark red to light yellow, then the solution was cannulated to a flask charged with iodide **8** (13 mg, 0.029 mmol). After two minutes, the mixture was cannulaed to a mixture of *Z*-vinylboronate **32** (7 mg, 0.0092 mmol) and  $\text{Ag}_2\text{O}$  (7 mg, 0.029 mmol) in 0.5 mL THF at room temperature. The reaction mixture was heated at 65 °C for 1 hour, and then cooled it down to room temperature, diluted with ether, filtered through a pad of Celite. The solvent was removed to afford the crude product. Flash chromatography on silica gel (9:1 (v/v) hexane/EtOAc) provided triene **33** (8 mg, 80% yield) as a colorless oil.  $R_f = 0.15$  (9:1 (v/v) hexane/EtOAc); IR (neat,  $\text{cm}^{-1}$ ) 2981, 1703;  $[\alpha]_D^{25} +22$  ( $c$  0.6,  $\text{CHCl}_3$ );  $^1\text{H}$  NMR ( $\text{CDCl}_3$ , 600 MHz)  $\delta$  7.69-7.60 (m, 4H), 7.44-7.36 (m, 6H), 6.85 (ddd,  $J = 9.6, 4.8, 3.6$  Hz, 1H),

6.75 (dd,  $J = 15.6, 11.4$  Hz, 1H), 6.30 (dd,  $J = 11.4, 11.4$  Hz, 1H), 6.20 (dd,  $J = 11.4, 11.4$  Hz, 1H), 6.06 (d,  $J = 11.4$  Hz, 1H), 6.04 (ddd,  $J = 9.6, 1.8, 1.8$  Hz, 1H), 5.87 (dd,  $J = 15.6, 1.2$  Hz, 1H), 5.83 (ddd,  $J = 15.0, 5.4, 5.4$  Hz, 1H), 5.75 (dd,  $J = 15.6, 6.6$  Hz, 1H), 5.42 (dd,  $J = 11.4, 9.0$  Hz, 1H), 4.93 (ddd,  $J = 15.6, 6.6, 1.2$  Hz, 1H), 4.69 (td,  $J = 9.0, 9.0, 3.0$  Hz, 1H), 4.29 (d,  $J = 3.6$  Hz, 1H), 3.70 (dd,  $J = 8.4, 1.8$  Hz, 1H), 2.43-2.41 (m, 3H), 1.90 (ddd,  $J = 14.4, 9.6, 1.8$  Hz, 2H), 1.33 (s, 3H), 1.08 (s, 9H), 1.00 (t,  $J = 8.4$  Hz, 9H), 0.96 (t,  $J = 8.4$  Hz, 9H), 0.88 (s, 9H), 0.68 (qd,  $J = 7.8, 2.4$  Hz, 6H), 0.68 (qd,  $J = 7.8, 1.2$  Hz, 6H), 0.05 (s, 3H), 0.04 (s, 3H);  $^{13}\text{C}$  NMR ( $\text{CDCl}_3$ , 150 MHz)  $\delta$  164.1, 144.5, 138.5, 136.6, 135.5 (4C), 134.8, 134.1, 133.6, 129.7, 129.6, 128.4, 127.7 (4C), 125.9, 124.6, 123.6, 122.4, 121.7, 78.0, 77.6, 76.2, 66.0, 64.2, 42.5, 29.8, 26.8 (3C), 26.0 (3C), 24.7, 19.3, 18.1, 7.20 (3C), 7.17 (3C), 6.91 (3C), 5.78 (3C), -3.07, -4.13; HRMS (CI) calcd for  $[\text{C}_{53}\text{H}_{86}\text{O}_6\text{Si}_4 + \text{Na}]^+$ : 953.5399, Found: 953.5395.

**(*R*)-5,6-dihydro-6-((1*E*,3*R*,4*R*,6*R*,7*Z*,9*Z*,11*E*)-3-triethylsilyl-6-*tert*-butyldimethylsilyl-4,13-dihydroxy-3-methyltrideca-1,7,9-11-tetraenyl)pyran-2-one (34).**

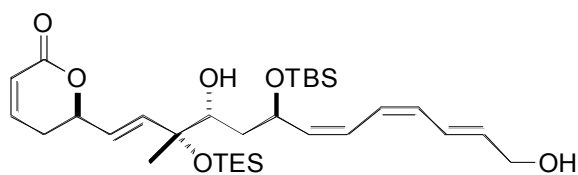

**34**

HF·pyridine complex (15  $\mu\text{L}$ ) was added to a solution of silyl ether **33** (10 mg, 0.011 mmol) in 0.5 mL a mixture of  $\text{CH}_3\text{CN}/\text{H}_2\text{O}/\text{Pyridine}$ : 9/1/2 at room temperature. After stirring for 2 days, the reaction was quenched with saturated aqueous  $\text{NaHCO}_3$  and diluted with  $\text{Et}_2\text{O}$ . The aqueous layer was extracted with  $\text{Et}_2\text{O}$ . The combined organic

layers were washed with brine and dried over anhydrous Na<sub>2</sub>SO<sub>4</sub>, and concentrated to afford the crude product. Flash chromatography on silica gel (7:3 (v/v) hexane/EtOAc) provided alcohol **35** (3 mg, 40% yield) and diol **34** (3 mg, 45% yield).

$R_f = 0.24$  (5:5 (v/v) hexane/EtOAc); IR (neat, cm<sup>-1</sup>) 3420, 2980, 1715;  $[\alpha]_D^{25} -11^\circ$  (c 0.4, CHCl<sub>3</sub>); <sup>1</sup>H NMR (CDCl<sub>3</sub>, 600 MHz)  $\delta$  6.88 (ddd,  $J = 9.0, 5.4, 3.6$  Hz, 1H), 6.73 (ddd,  $J = 15.0, 11.4, 1.2$  Hz, 1H), 6.38 (dd,  $J = 11.4, 11.4$  Hz, 1H), 6.20 (dd,  $J = 11.4, 11.4$  Hz, 1H), 6.06 (d,  $J = 10.8$  Hz, 1H), 6.04 (ddd,  $J = 9.6, 1.8, 1.8$  Hz, 1H), 5.91 (dd,  $J = 15.0, 6.0, 5.4$  Hz, 1H), 5.88 (dd,  $J = 16.2, 1.2$  Hz, 1H), 5.79 (dd,  $J = 15.6, 6.0$  Hz, 1H), 5.55 (dd,  $J = 10.2, 9.6$  Hz, 1H), 4.96 (ddd,  $J = 10.2, 6.0, 1.2$  Hz, 1H), 4.91 (td,  $J = 7.8, 7.8, 2.4$  Hz, 1H), 4.24 (dd,  $J = 4.8, 4.8$  Hz, 1H), 3.67 (dd,  $J = 11.4, 2.4$  Hz, 1H), 2.95 (d,  $J = 2.4$  Hz, 1H), 2.46-2.42 (m, 2H), 1.64 (dd,  $J = 13.8, 7.8$  Hz, 2H), 1.31 (s, 3H), 0.92 (t,  $J = 8.4$  Hz, 9H), 0.87 (s, 9H), 0.77 (q,  $J = 7.8$  Hz, 6H), 0.06 (s, 3H), 0.02 (s, 3H); <sup>13</sup>C NMR (CDCl<sub>3</sub>, 150 MHz)  $\delta$  164.1, 144.6, 138.1, 136.3, 134.1, 129.8, 127.1, 126.2, 124.3, 122.3, 122.0, 77.8, 77.1, 75.1, 67.1, 63.6, 39.2, 29.8, 26.0 (3C), 22.3, 18.3, 7.26 (3C), 6.92 (3C), -4.14, -4.87; HRMS (CI) calcd for [C<sub>31</sub>H<sub>54</sub>O<sub>6</sub>Si<sub>2</sub>+ Na]<sup>+</sup>: 601.3357, Found: 601.3350.

(Preparation from compound **35**)

HF·pyridine complex (12  $\mu$ L) was added to a solution of silyl ether **35** (6 mg, 0.008 mmol) in 0.5 mL a mixture of CH<sub>3</sub>CN/H<sub>2</sub>O/Pyridine: 9/1/2 at room temperature. After stirring for 1 day, the reaction was quenched with saturated aqueous NaHCO<sub>3</sub> and diluted with Et<sub>2</sub>O. The aqueous layer was extracted with Et<sub>2</sub>O. The combined organic layers were washed with brine and dried over anhydrous Na<sub>2</sub>SO<sub>4</sub>, and concentrated to afford the crude product. Flash chromatography on silica gel (7:3 (v/v) hexane/EtOAc) provided diol **34** as a colorless oil (4 mg, 82% yield).

**(R)-5,6-dihydro-6-((1E,3R,4R,6R,7Z,9Z,11E)-3,4-bistriethylsilyl-6-tert-butyl dimethylsilyl-13-hydroxy-3-methyltrideca-1,7,9-11-tetraenyl)pyran-2-one (35).**

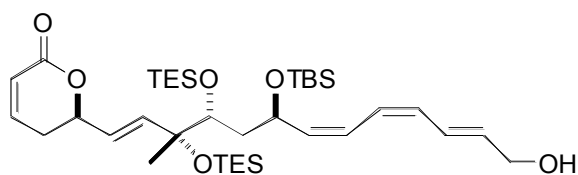

**35**

$R_f = 0.52$  (5:5 (v/v) hexane/EtOAc); IR (neat,  $\text{cm}^{-1}$ ) 3425, 2987, 1720;  $[\alpha]_D^{25} +45^\circ$  ( $c$  1.0,  $\text{CHCl}_3$ );  $^1\text{H}$  NMR ( $\text{CDCl}_3$ , 600 MHz)  $\delta$  6.86 (ddd,  $J = 9.0, 4.8, 3.6$  Hz, 1H), 6.73 (ddd,  $J = 15.0, 11.4, 1.2$  Hz, 1H), 6.37 (dd,  $J = 11.4, 11.4$  Hz, 1H), 6.24 (dd,  $J = 11.4, 11.4$  Hz, 1H), 6.06 (d,  $J = 11.4$  Hz, 1H), 6.04 (ddd,  $J = 9.6, 1.8, 1.8$  Hz, 1H), 5.91 (dd,  $J = 15.6, 6.0, 5.4$  Hz, 1H), 5.86 (dd,  $J = 15.6, 1.2$  Hz, 1H), 5.74 (dd,  $J = 15.6, 6.6$  Hz, 1H), 5.45 (dd,  $J = 10.2, 9.6$  Hz, 1H), 4.93 (ddd,  $J = 15.6, 6.0, 1.2$  Hz, 1H), 4.68 (td,  $J = 9.6, 9.6, 2.4$  Hz, 1H), 4.25 (d,  $J = 4.8$  Hz, 1H), 3.70 (dd,  $J = 8.4, 1.8$  Hz, 1H), 2.43-2.41 (m, 2H), 1.89 (ddd,  $J = 14.4, 10.2, 1.8$  Hz, 2H), 1.33 (s, 3H), 1.08 (ddd,  $J = 11.4, 8.4, 3.0$  Hz, 2H), 0.98 (t,  $J = 8.4$  Hz, 9H), 0.95 (t,  $J = 8.4$  Hz, 9H), 0.87 (s, 9H), 0.67 (qd,  $J = 7.8, 2.4$  Hz, 6H), 0.61 (qd,  $J = 7.8, 1.2$  Hz, 6H), 0.04 (s, 3H), 0.02 (s, 3H);  $^{13}\text{C}$  NMR ( $\text{CDCl}_3$ , 150 MHz)  $\delta$  164.0, 144.5, 138.4, 137.1, 133.8, 129.4, 126.0, 125.9, 124.5, 122.2, 121.7, 77.9, 77.6, 76.2, 66.0, 63.4, 42.5, 29.7 (3C), 26.0 (3C), 24.7, 18.1, 13.3, 7.16 (3C), 7.17 (3C), 6.91 (3C), 5.78 (3C), -3.05, -4.10; HRMS (CI) calcd for  $[\text{C}_{37}\text{H}_{68}\text{O}_6\text{Si}_3 + \text{Na}]^+$ : 715.4221, Found: 715.4215.

**(*R*)-5,6-dihydro-6-((1*E*,3*R*,4*R*,6*R*,7*Z*,9*Z*,11*E*)-3-bistriethylsilyl-4-hydroxy-6-*tert*-butyldimethylsilyl-13-*tert*-butyldiphenylsilyl-3-methyltrideca-1,7,9-11-tetraenyl)pyran-2-one (5).**

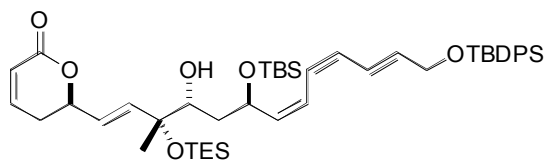

**5**

To a solution of alcohol **34** (5 mg, 0.0083 mmol) in 0.2 mL of CH<sub>2</sub>Cl<sub>2</sub> was added imidazole (2 mg, 0.027 mmol) and TBDPSCl (3 mg, 0.012 mmol) at 0 °C. After 5 minutes, the reaction mixture was purified by using flash chromatography on silica gel (9:1 (v/v) hexane/EtOAc) without workup provided compound **5** (5 mg, 78% yield) as a yellow oil.  $R_f = 0.46$  (8:2 (v/v) hexane/EtOAc); IR (neat, cm<sup>-1</sup>) 3412, 2981, 1728;  $[\alpha]_D^{25} -18$  (c 0.4, CHCl<sub>3</sub>); <sup>1</sup>H NMR (CDCl<sub>3</sub>, 600 MHz) δ 7.69-7.67 (m, 4H), 7.44-7.33 (m, 6H), 6.88 (ddd,  $J = 8.4, 5.4, 3.6$  Hz, 1H), 6.75 (dd,  $J = 15.6, 11.4$  Hz, 1H), 6.33 (dd,  $J = 11.4, 11.4$  Hz, 1H), 6.15 (dd,  $J = 11.4, 11.4$  Hz, 1H), 6.07-6.03 (m, 2H), 5.89 (dd,  $J = 15.6, 1.2$  Hz, 1H), 5.83 (ddd,  $J = 15.6, 5.4, 5.4$  Hz, 1H), 5.80 (dd,  $J = 15.6, 6.0$  Hz, 1H), 5.53 (dd,  $J = 10.2, 9.6$  Hz, 1H), 4.98-4.91 (m, 2H), 4.29 (d,  $J = 4.2$  Hz, 2H), 3.68 (d,  $J = 10.8$  Hz, 1H), 2.99 (d,  $J = 2.4$  Hz, 1H), 2.46-2.43 (m, 2H), 1.64 (dd,  $J = 13.8, 7.8$  Hz, 1H), 1.33-1.37 (m, 1H), 1.32 (s, 3H), 1.08 (s, 9H), 0.93 (t,  $J = 7.8$  Hz, 9H), 0.88 (s, 9H), 0.57 (q,  $J = 7.8$  Hz, 6H), 0.07 (s, 3H), 0.04 (s, 3H); <sup>13</sup>C NMR (CDCl<sub>3</sub>, 150 MHz) δ 163.9, 144.3, 137.9, 135.5 (4C), 134.3, 133.6, 133.6, 130.1, 129.7 (2C), 127.7 (4C), 126.8, 124.5, 123.2, 122.3, 121.8, 77.6, 75.0, 67.0, 64.2, 39.0, 29.6 (3C), 26.8 (3C), 25.8 (3C), 22.2, 19.3, 18.1, 7.10 (3C), 6.73 (3C), -4.33, -5.07; HRMS (CI) calcd for [C<sub>47</sub>H<sub>72</sub>O<sub>6</sub>Si<sub>3</sub>+ Na]<sup>+</sup>: 839.4534,

Found: 839.4528.

**Fostriecin (1).**

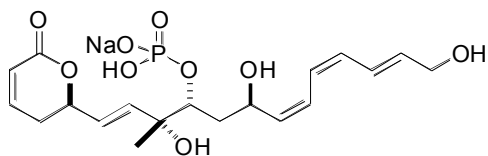

**1**

To a solution of alcohol **5** (5 mg, 0.006 mmol) in 0.4 mL of pyridine was added  $\text{PCl}_3$  (2.5 mL, 0.03 mmol) at 0 °C and stirred for 15 minutes. 4-Methoxybenyl alcohol (19  $\mu\text{L}$ , 0.15 mmol) was added, and then the reaction was gradually warmed to room temperature for 1 hour and dilute with 1.2 mL of  $\text{CH}_2\text{Cl}_2$ . *tert*-Butyl hydroperoxide (5.5 M in decane, 55  $\mu\text{L}$ , 0.35 mmol) was added and stirred at room temperature for 1.5 hour. To the reaction mixture, saturated  $\text{NaHO}_3$  solution was added; the mixture was stirred for several minutes, and then extracted with  $\text{CH}_2\text{Cl}_2$ . The organic layer was dried over  $\text{Na}_2\text{SO}_4$  and concentrated under reduced pressure. The residue was treated with 48% HF-acetonitrile (1: 19, 0.3 mL) at room temperature for 15 minutes. After ice cooling, pyridine (95  $\mu\text{L}$ ) was added to the reaction mixture, and the mixture was stirred at room temperature for 23 hours. The reaction mixture was basified with saturated  $\text{NaHO}_3$  solution and washed with ether. The aqueous layer was concentrated under reduced pressure, and the residue was purified by 18-reversed phase silica gel column chromatography ( $\text{H}_2\text{O}$  to  $\text{H}_2\text{O}$ /acetonitrile = 9/1) to give fostriecin **1** (0.5 mg, 31% yield) as a white solid.  $[\alpha]_D^{25} -325$  (c 0.1 w/v %,  $\text{D}_2\text{O}$ )\*;  $^1\text{H}$  NMR ( $\text{D}_2\text{O}$ , 600 MHz)  $\delta$  7.03 (ddd,  $J = 10, 6, 3$  Hz, 1H), 6.70 (dd,  $J = 15, 12$  Hz, 1H), 6.49 (t,  $J = 11$  Hz, 1H), 6.29 (t,  $J = 12$  Hz, 1H), 6.09 (t,  $J =$

11 Hz, 1H), 5.96 (dd,  $J = 10, 2$  Hz, 1H), 5.92-5.84 (m, 3H), 5.50 (t,  $J = 10$  Hz, 1H), 5.06 (m, 1H), 4.88 (t,  $J = 9$  Hz, 1H), 4.12 (d,  $J = 6$  Hz, 2H), 4.10-4.06 (m, 1H), 2.56 (td,  $J = 19, 6$  Hz, 1H), 2.44-2.50 (m, 1H), 1.58 (t,  $J = 12$  Hz, 1H), 1.46 (m, 1H), 1.24 (s, 3H),  $^{13}\text{C}$  NMR: Data was not available due to lack of sample; HRMS (CI) calcd for  $[\text{C}_{19}\text{H}_{26}\text{O}_9\text{P}^+\text{Na}]^+$ : 475.1104, Found: 475.1114

[ $\ddagger$ ] Structure was not shown in the text.

[ $\ast$ ] The optical rotation data for our synthetic fostriecin did not match that of the natural material. This could be a result of both the different concentration and solvent. It should be noted that our optical rotation data for **5** did match that reported by Imanishi.

dg210.3

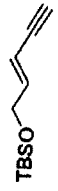

A

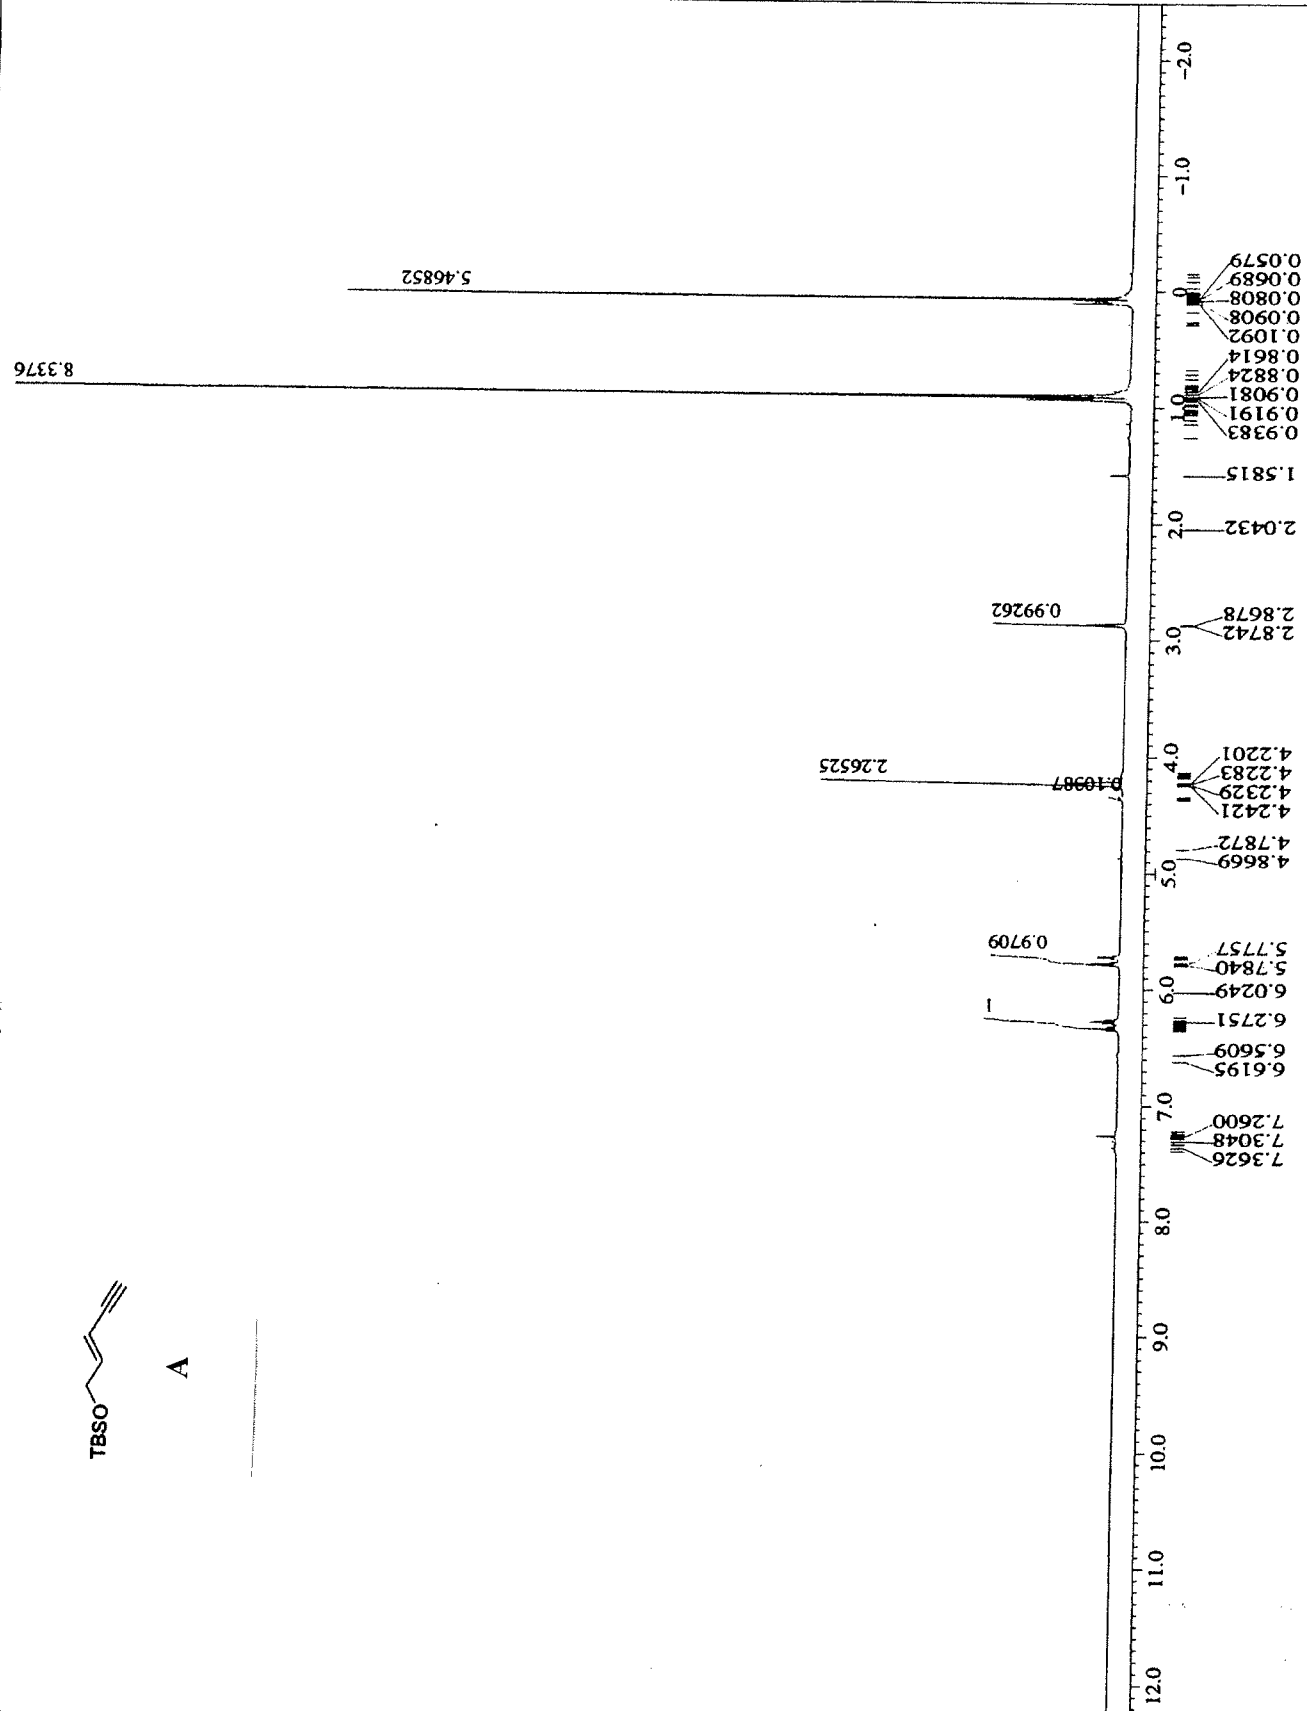

X : parts per Million : 1H



dg210c13.3

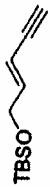

A

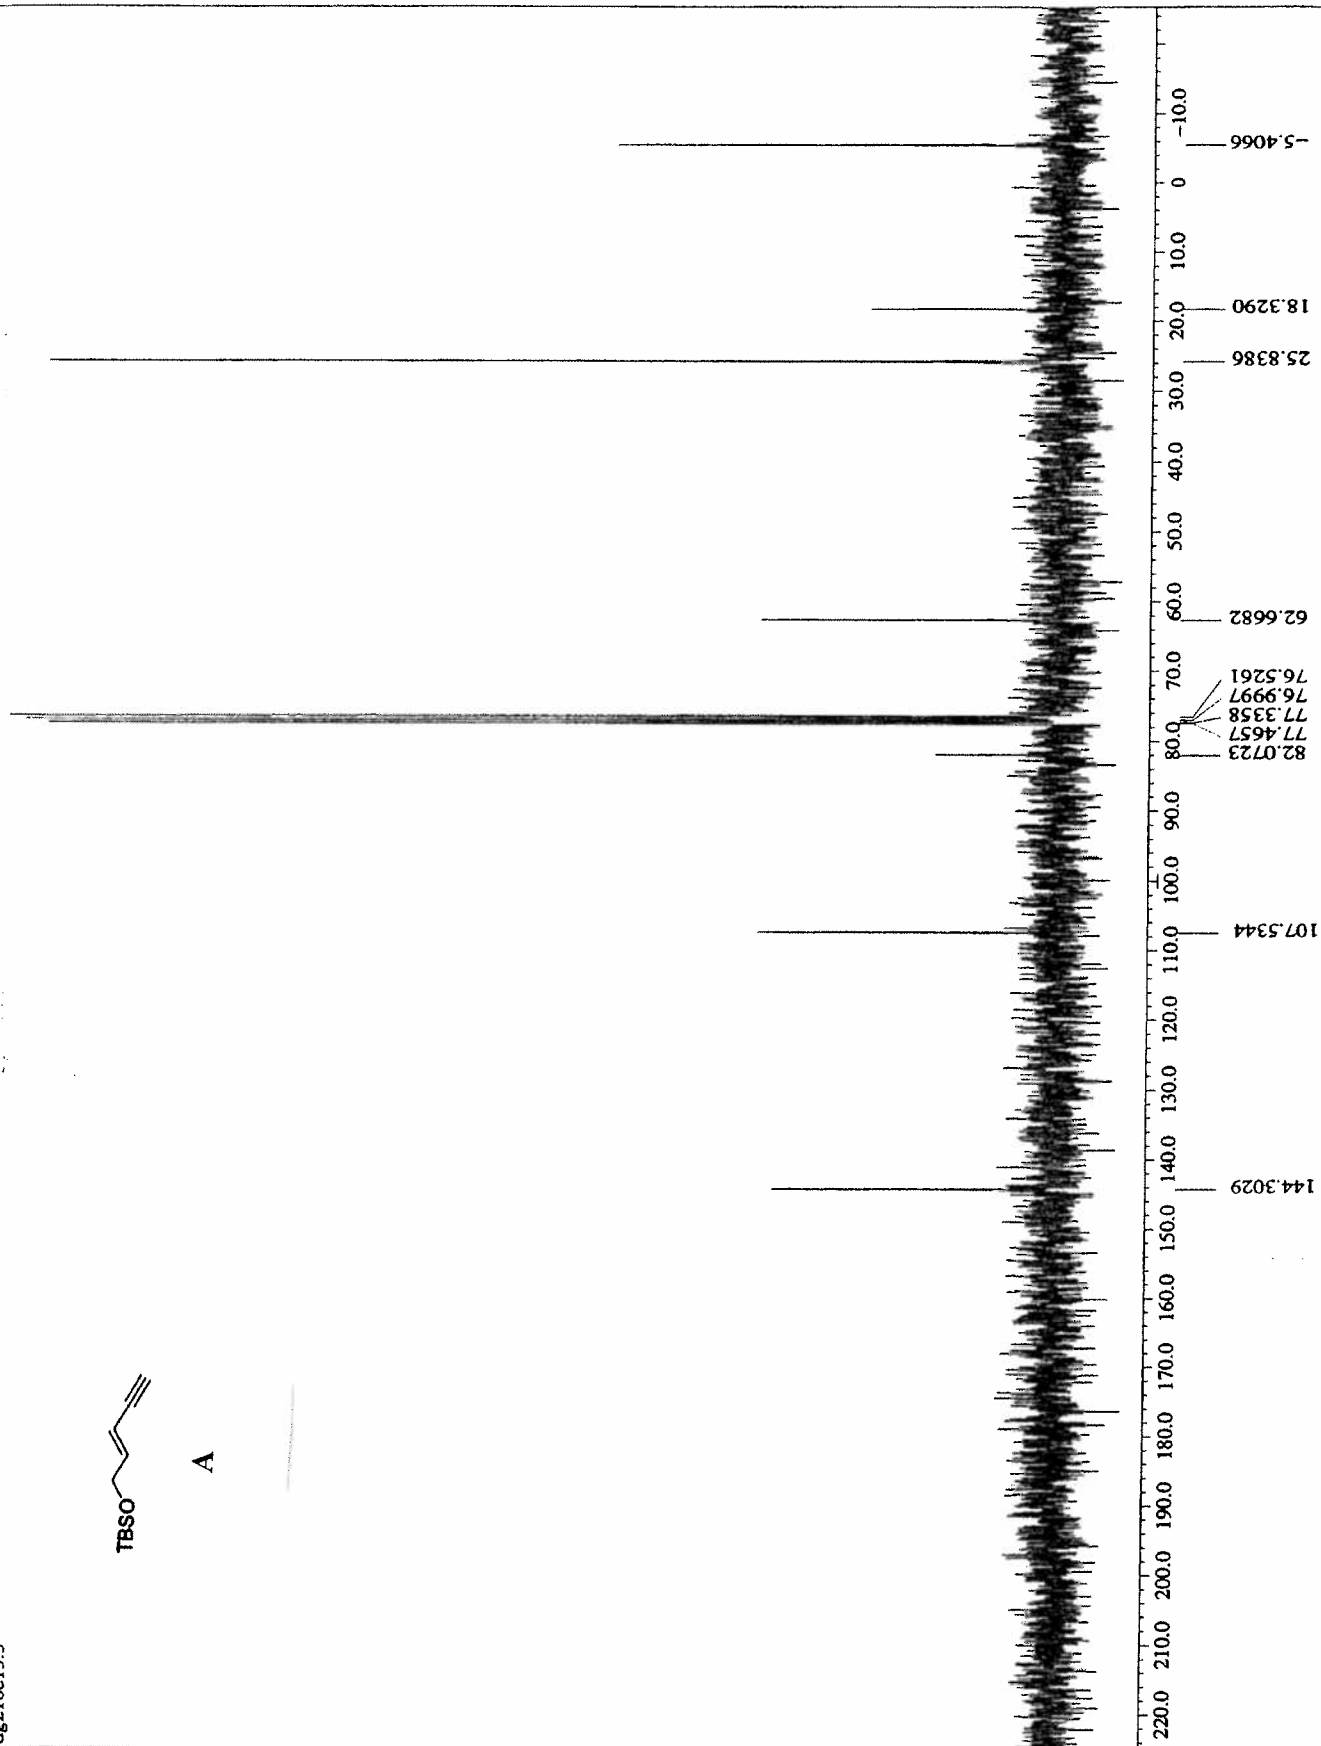

X : parts per Million : 13C

dg405.3

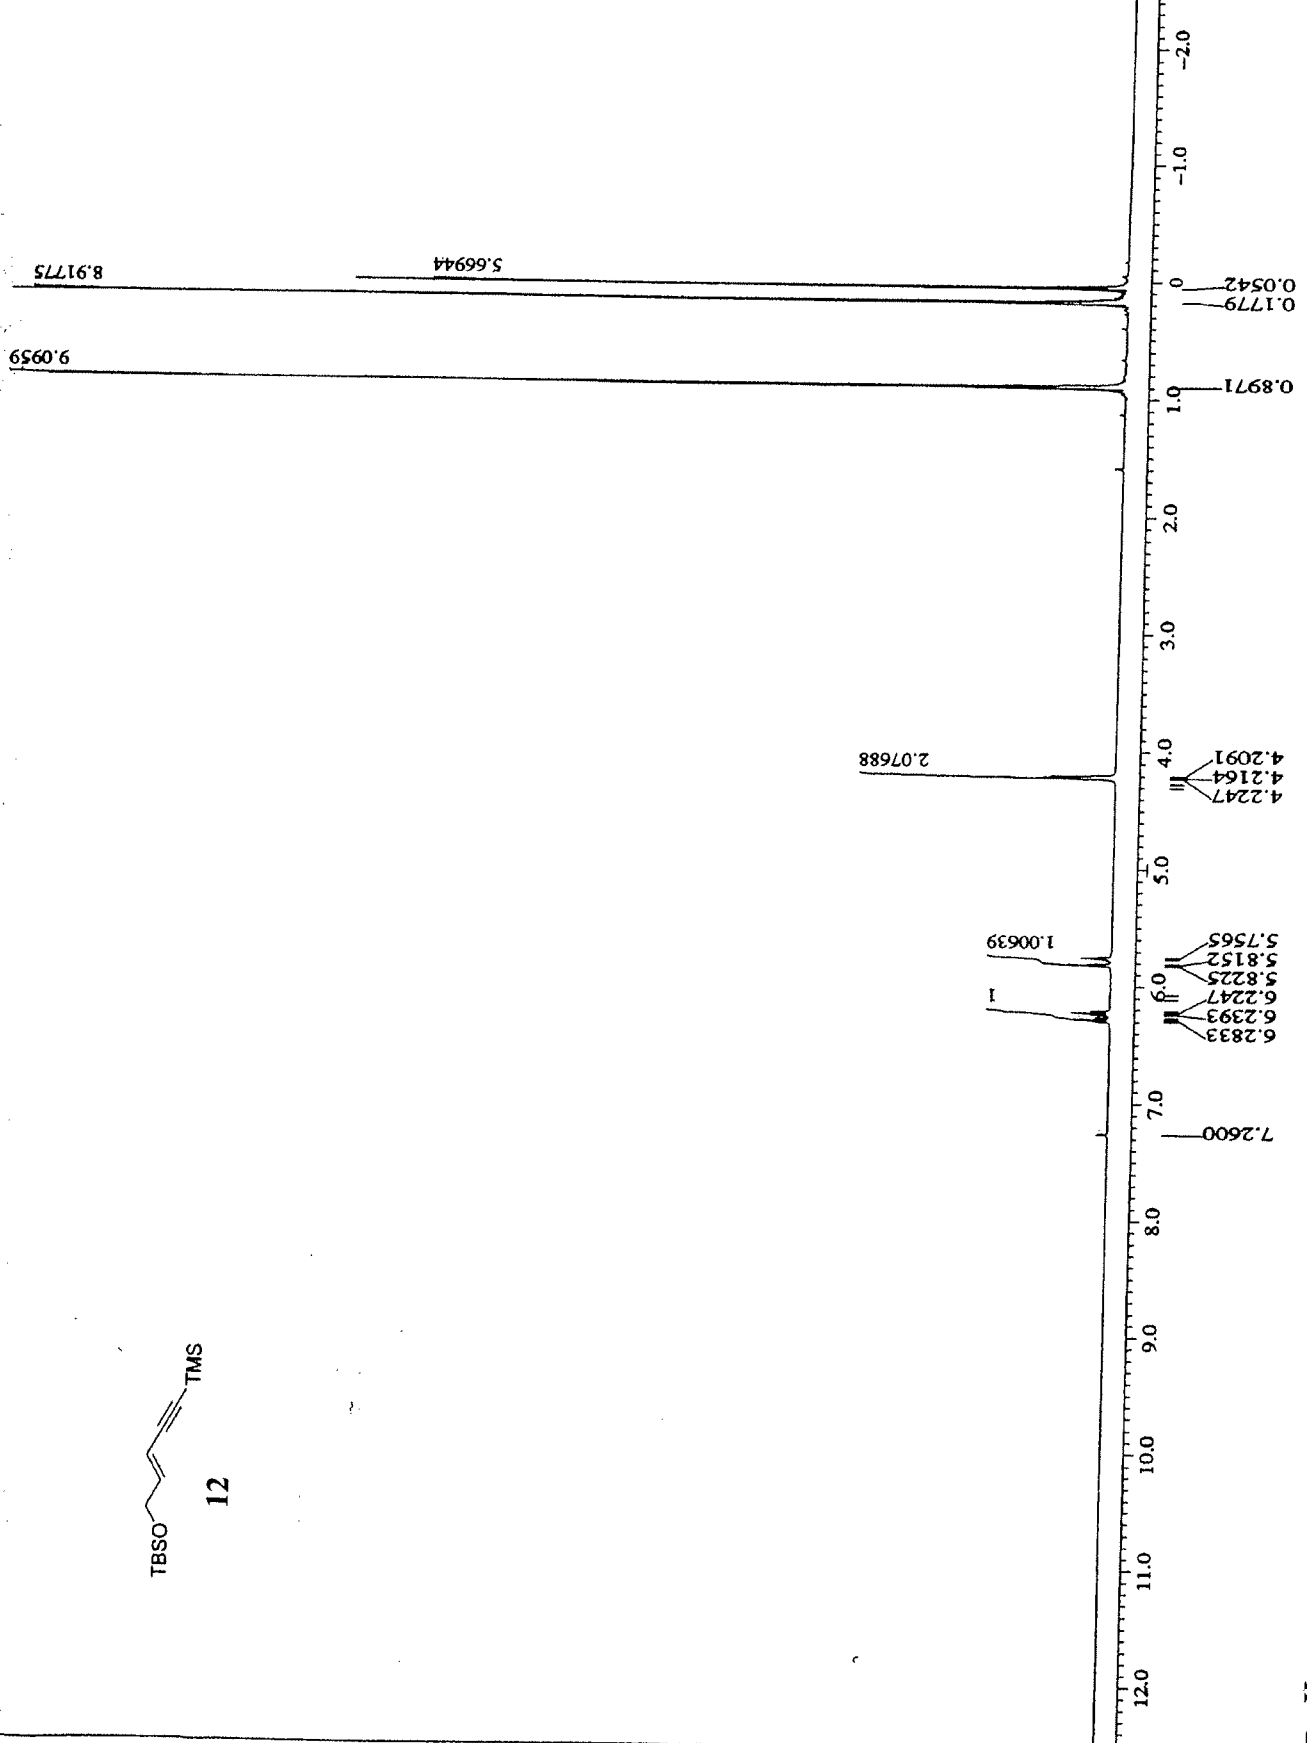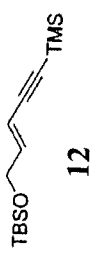

X : parts per Million : 1H

dg409c133

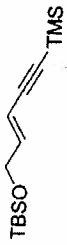

12

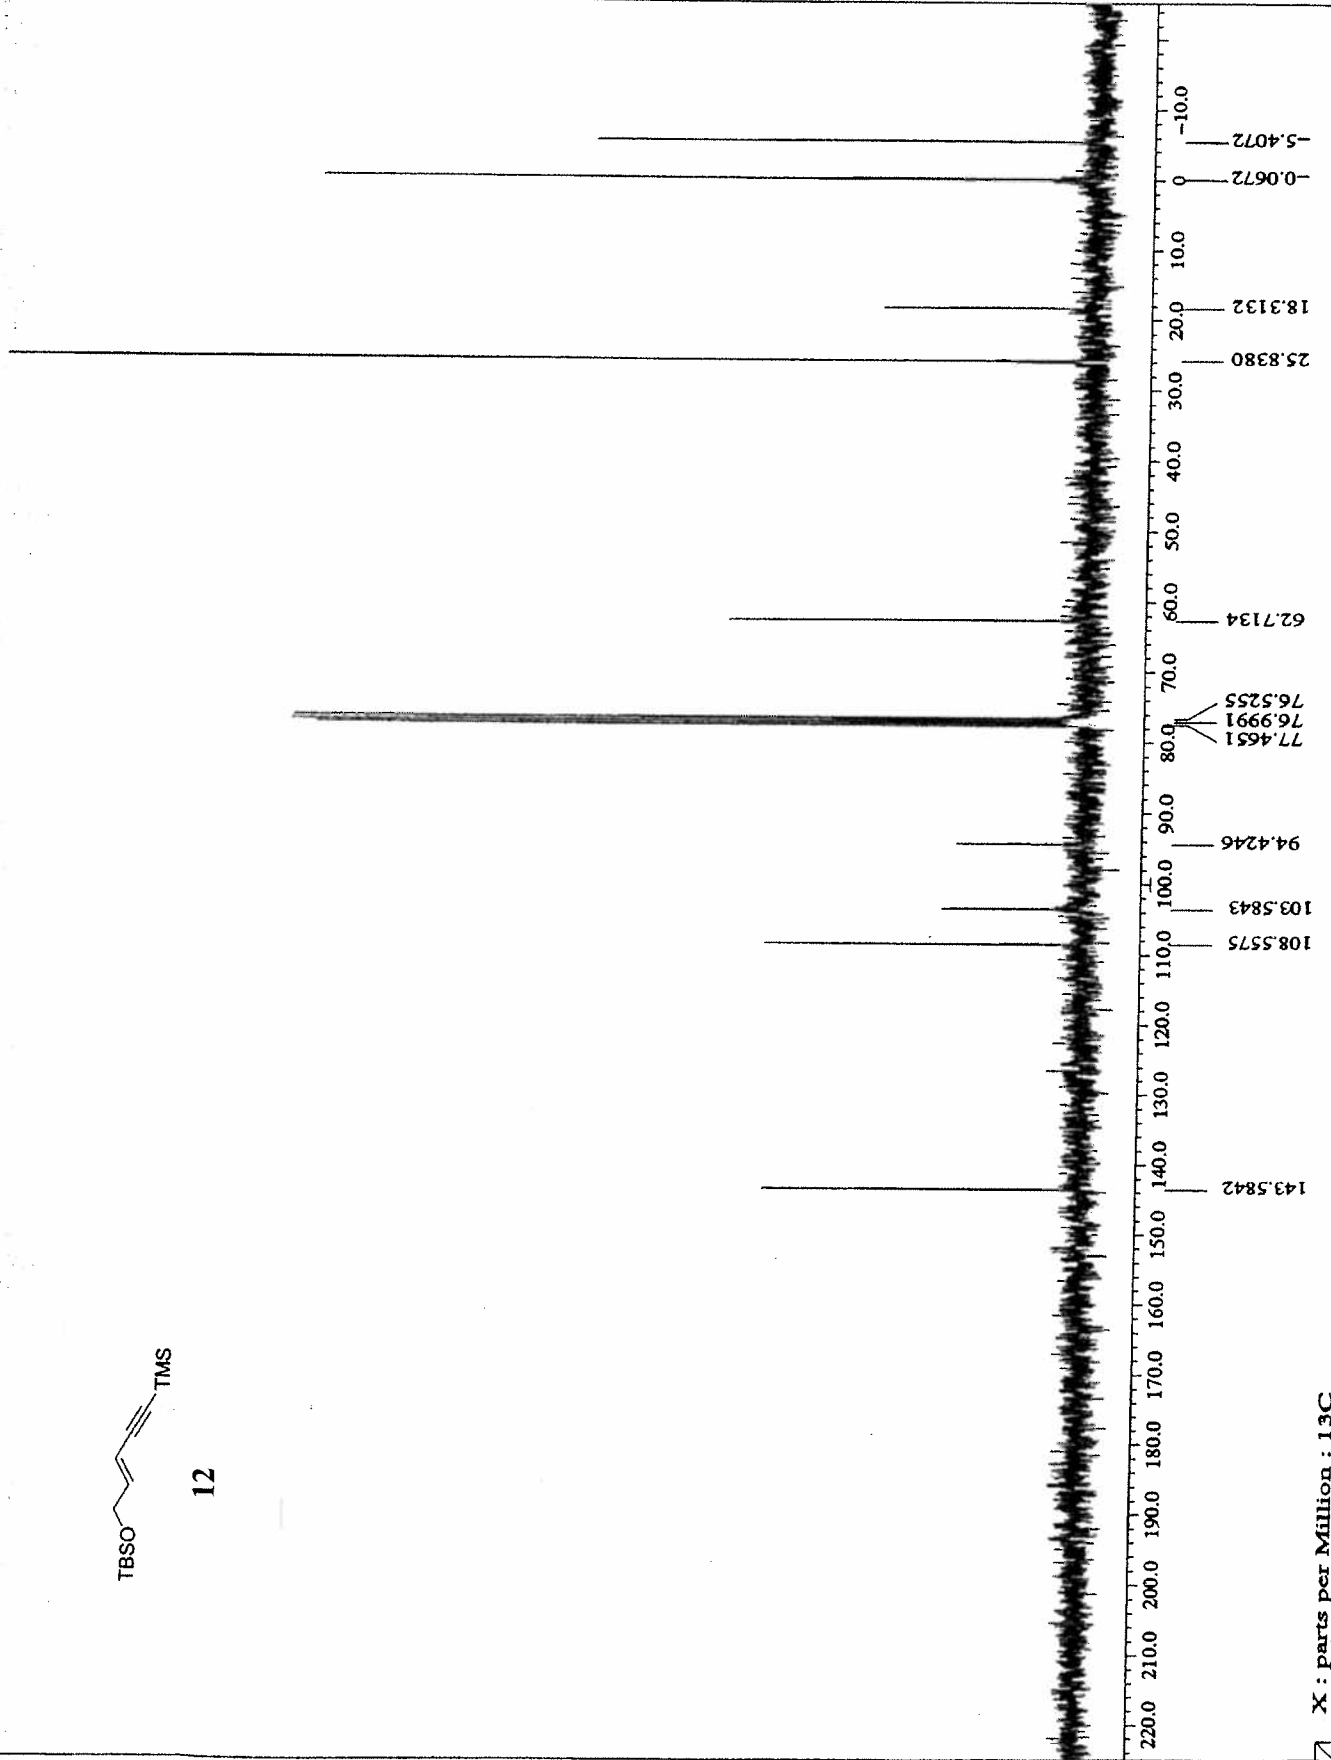

X : parts per Million : 13C

X : parts per Million : 1H

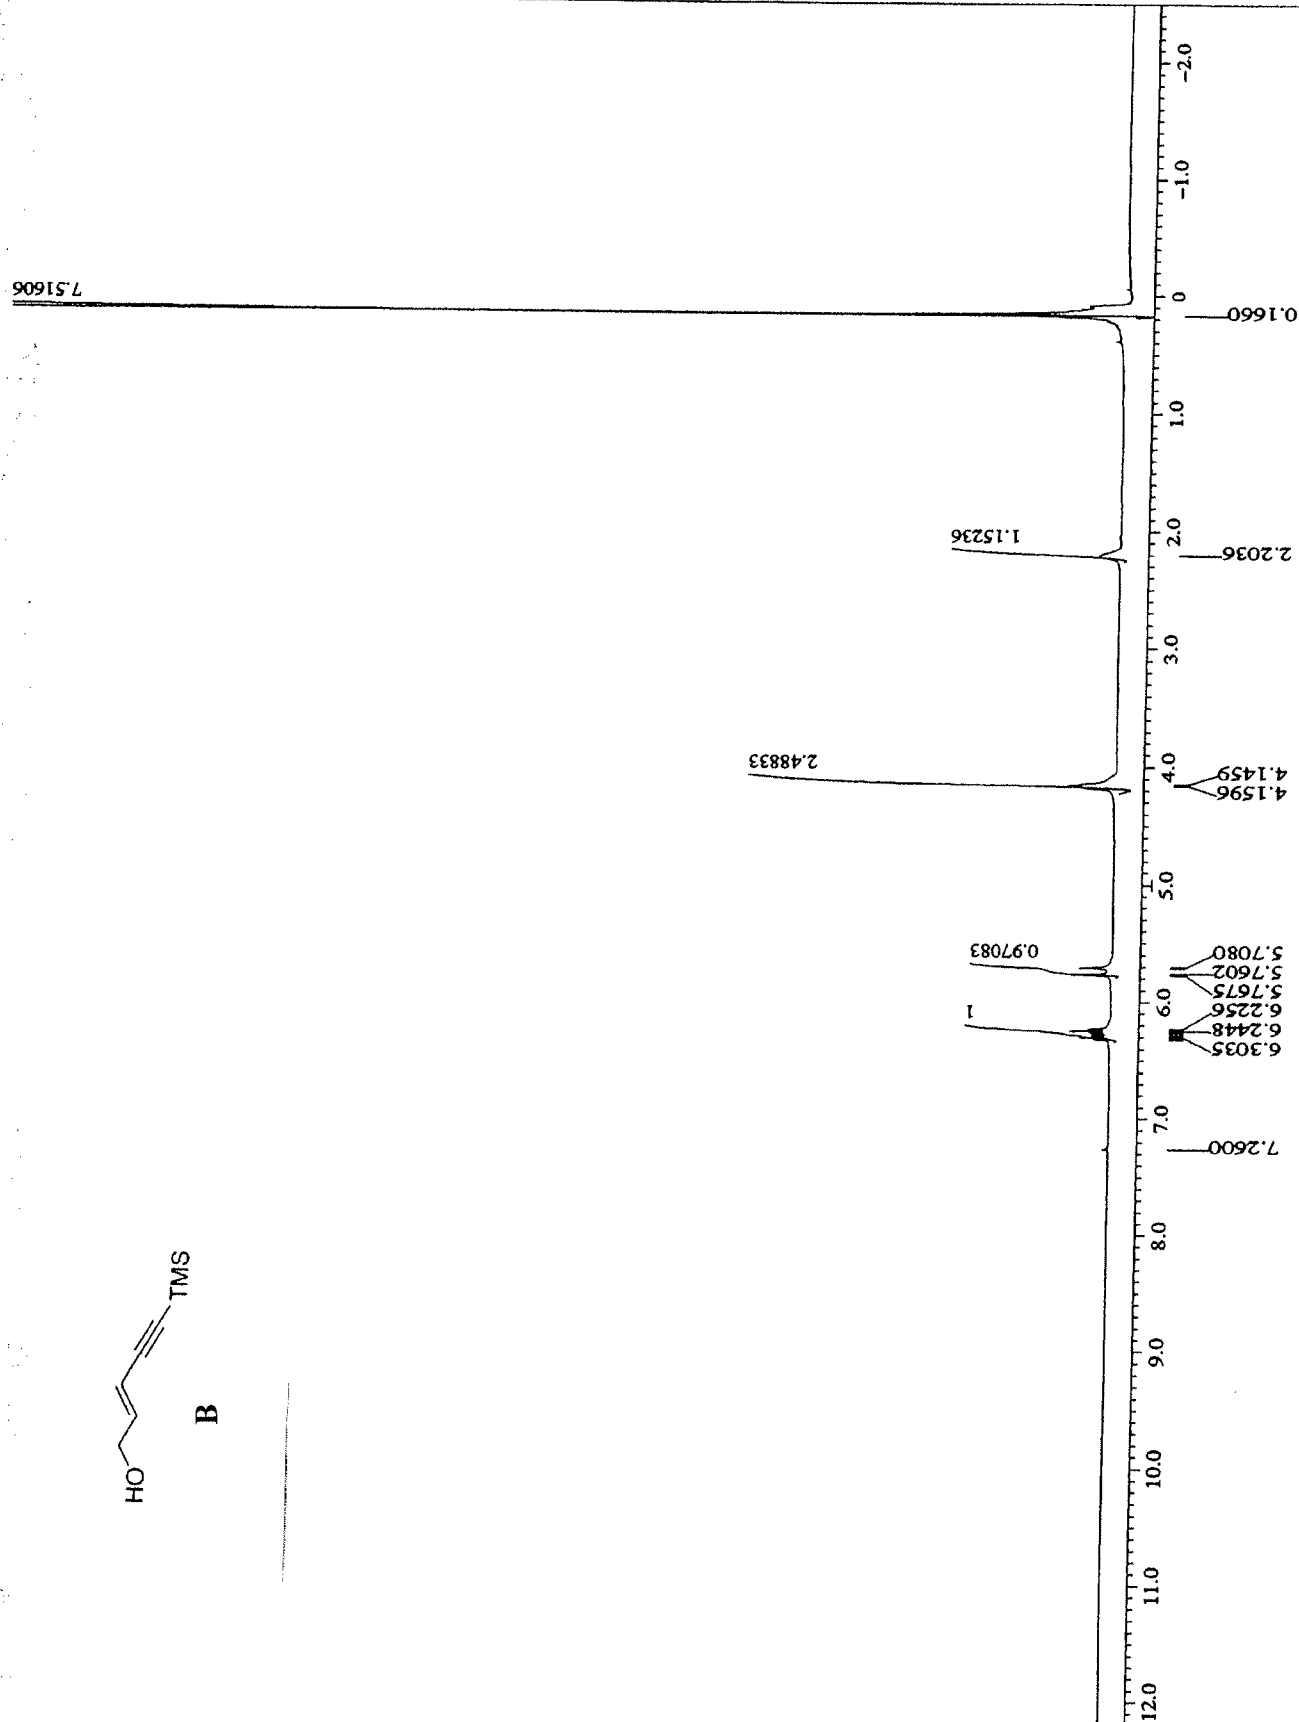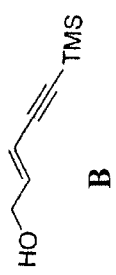

dg406.3

dg-406.4

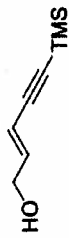

B

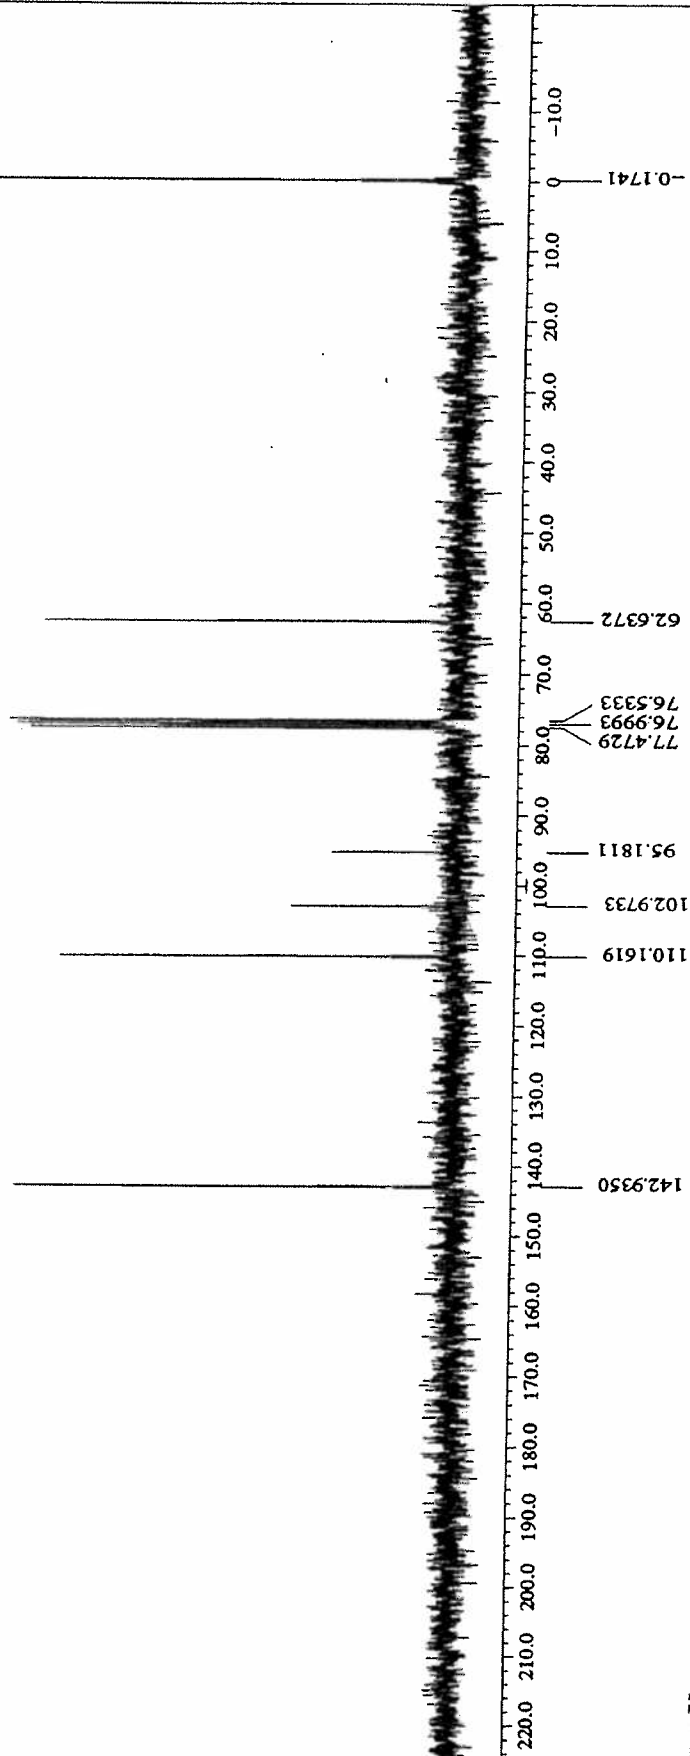

X : parts per Million :  $^{13}\text{C}$

dg406.6

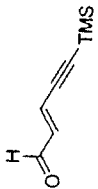

13

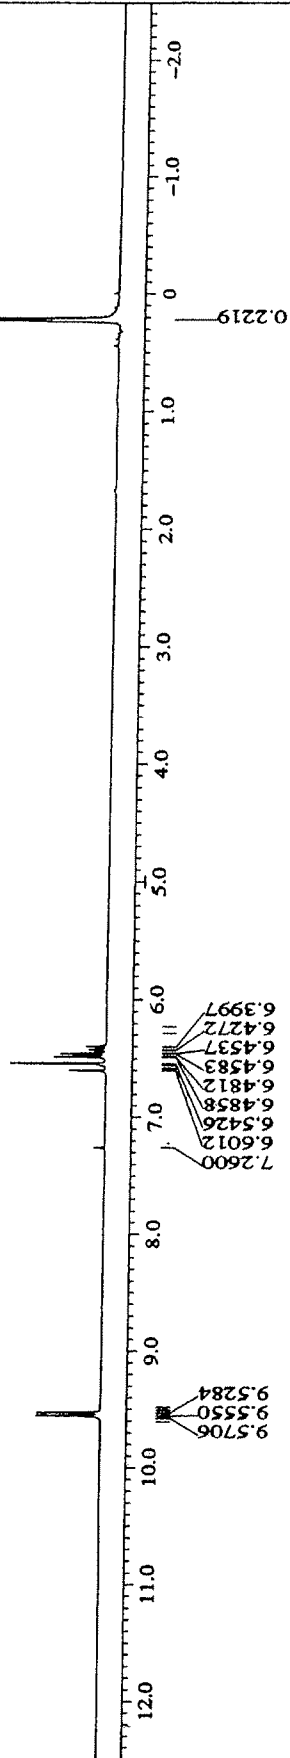

X : parts per Million : 1H

dg406.7

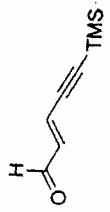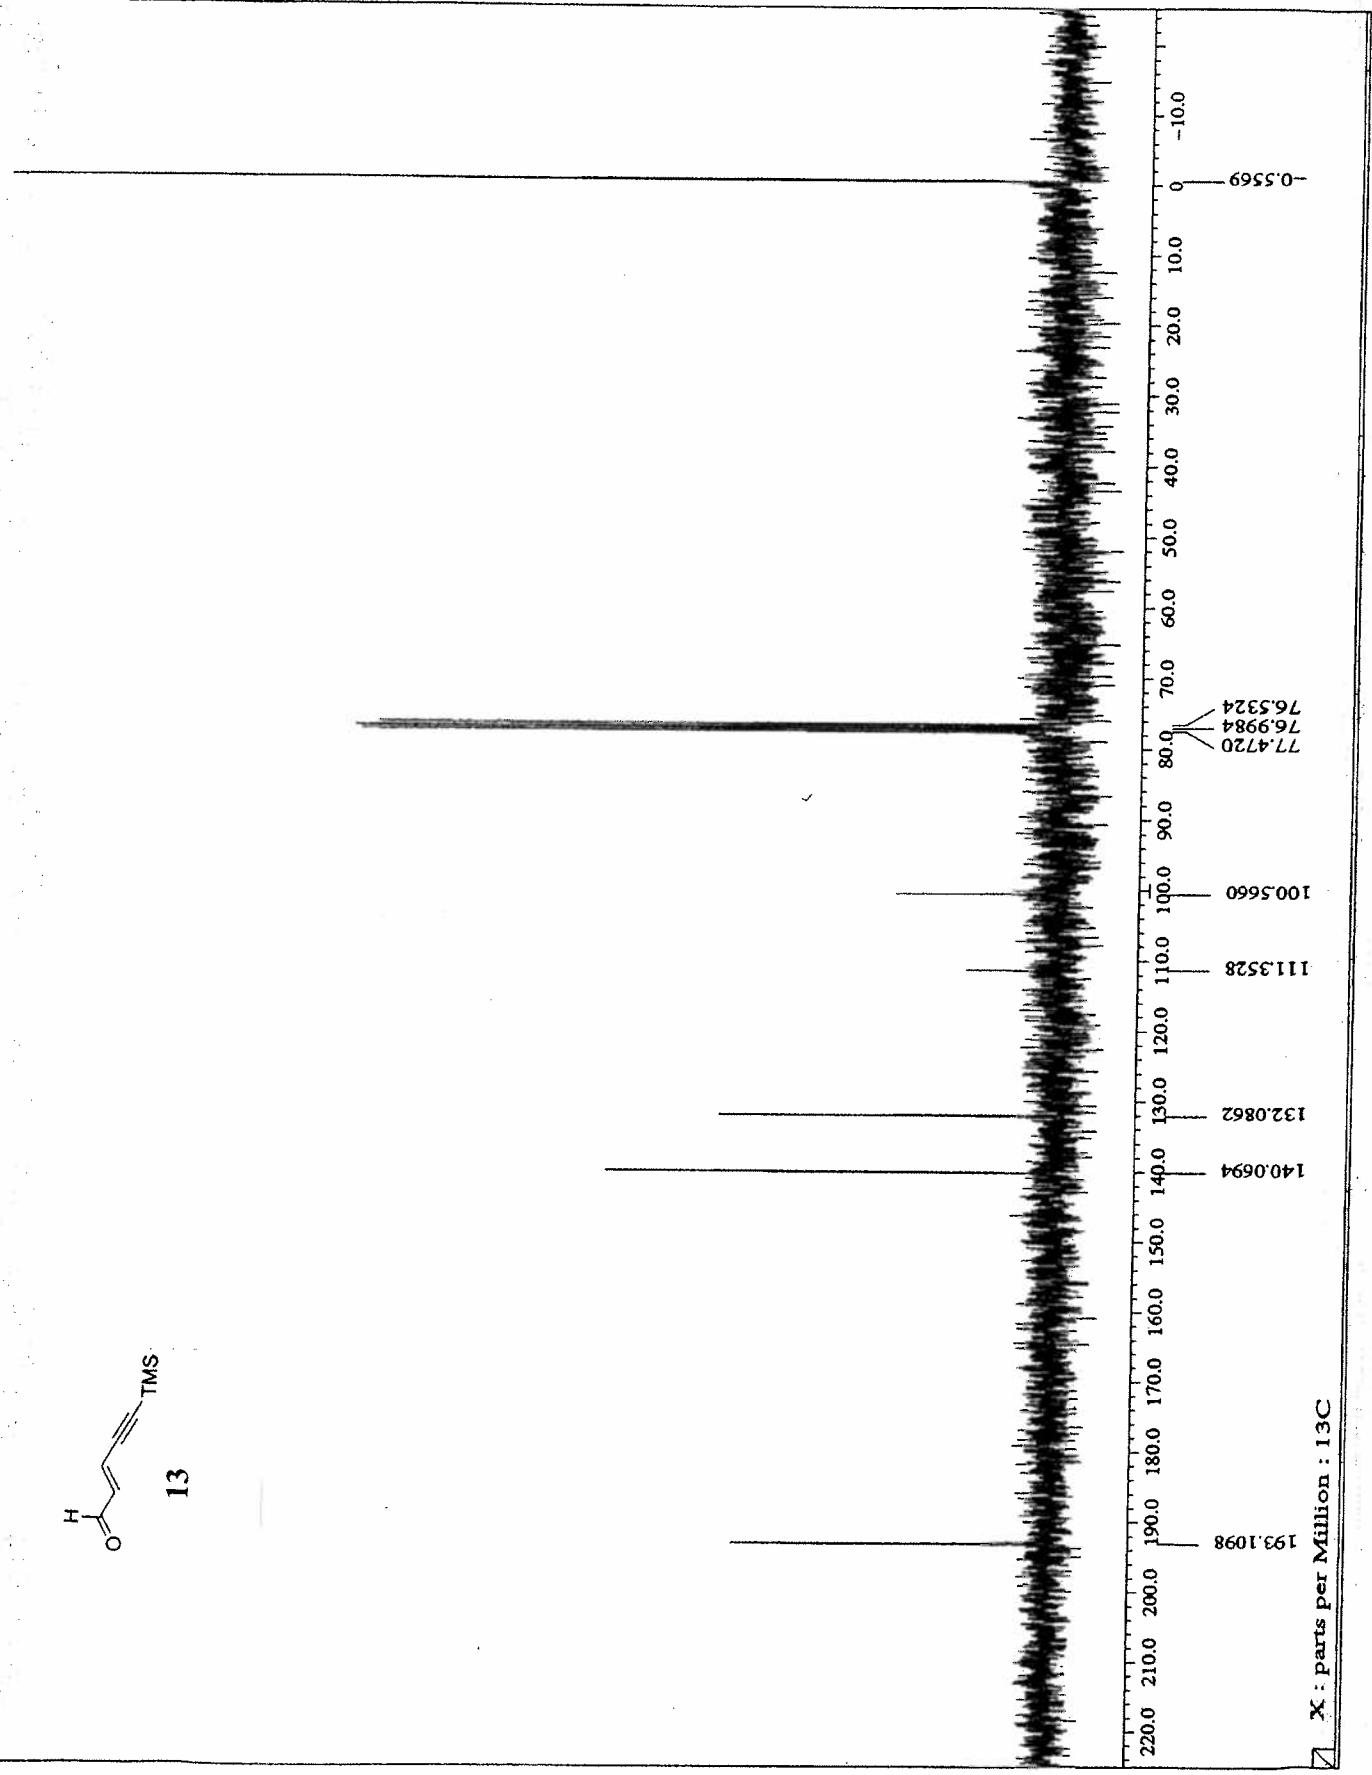

dg409.3

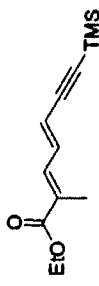

14a

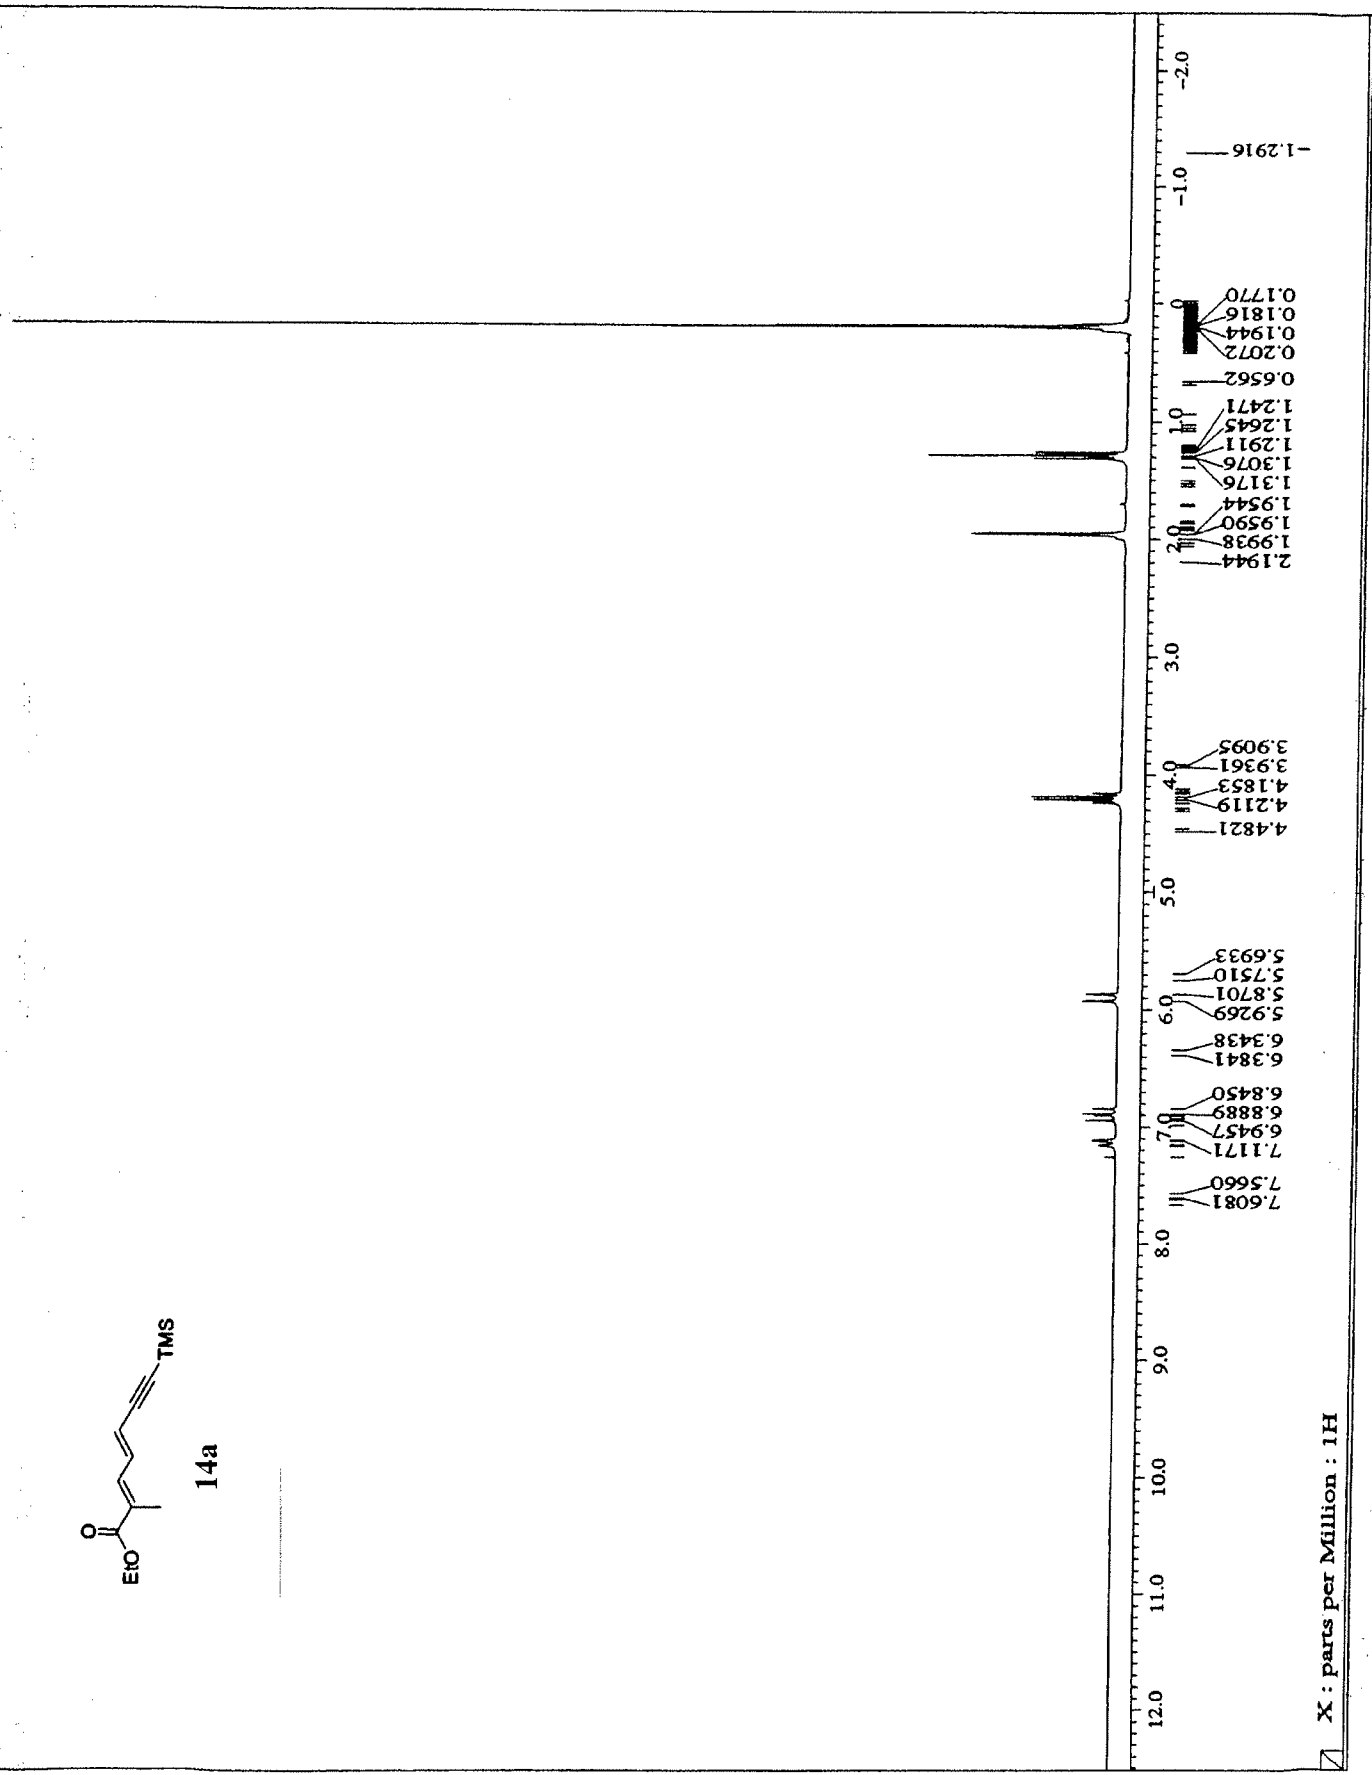

X : parts per Million : 1H



CS409.4

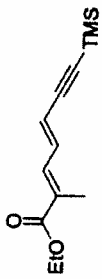

14a

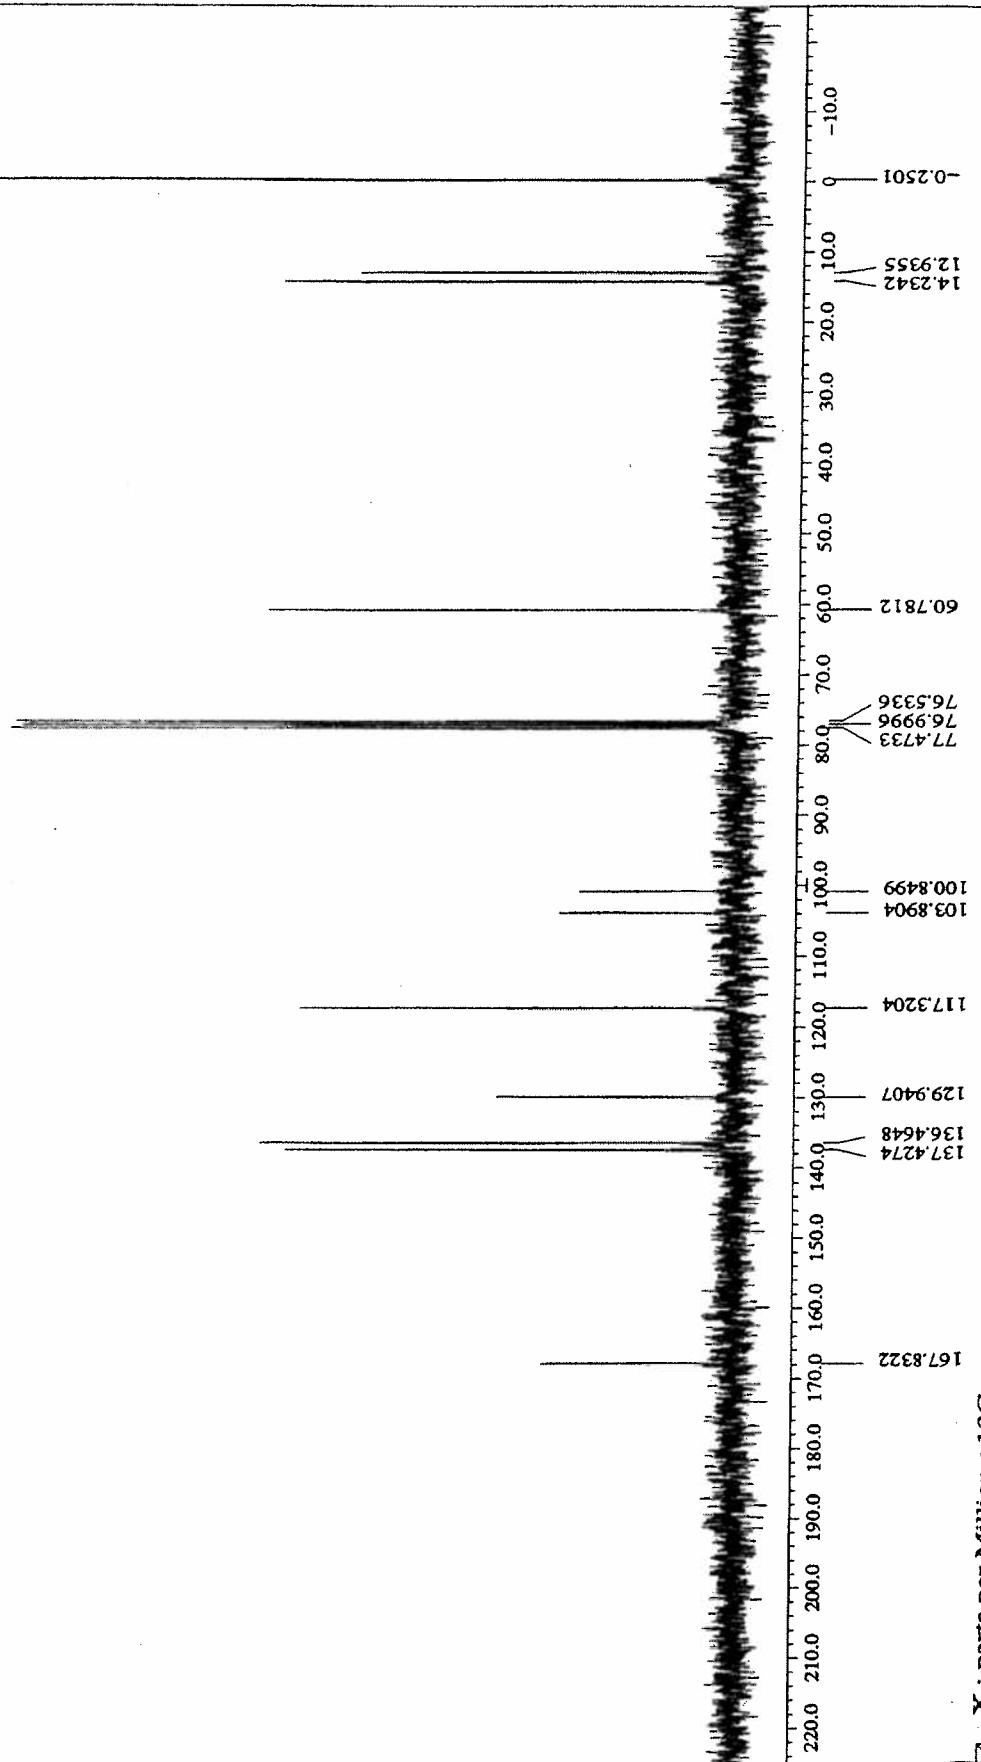

X : parts per Million : 13C

X : parts per Million : 1H

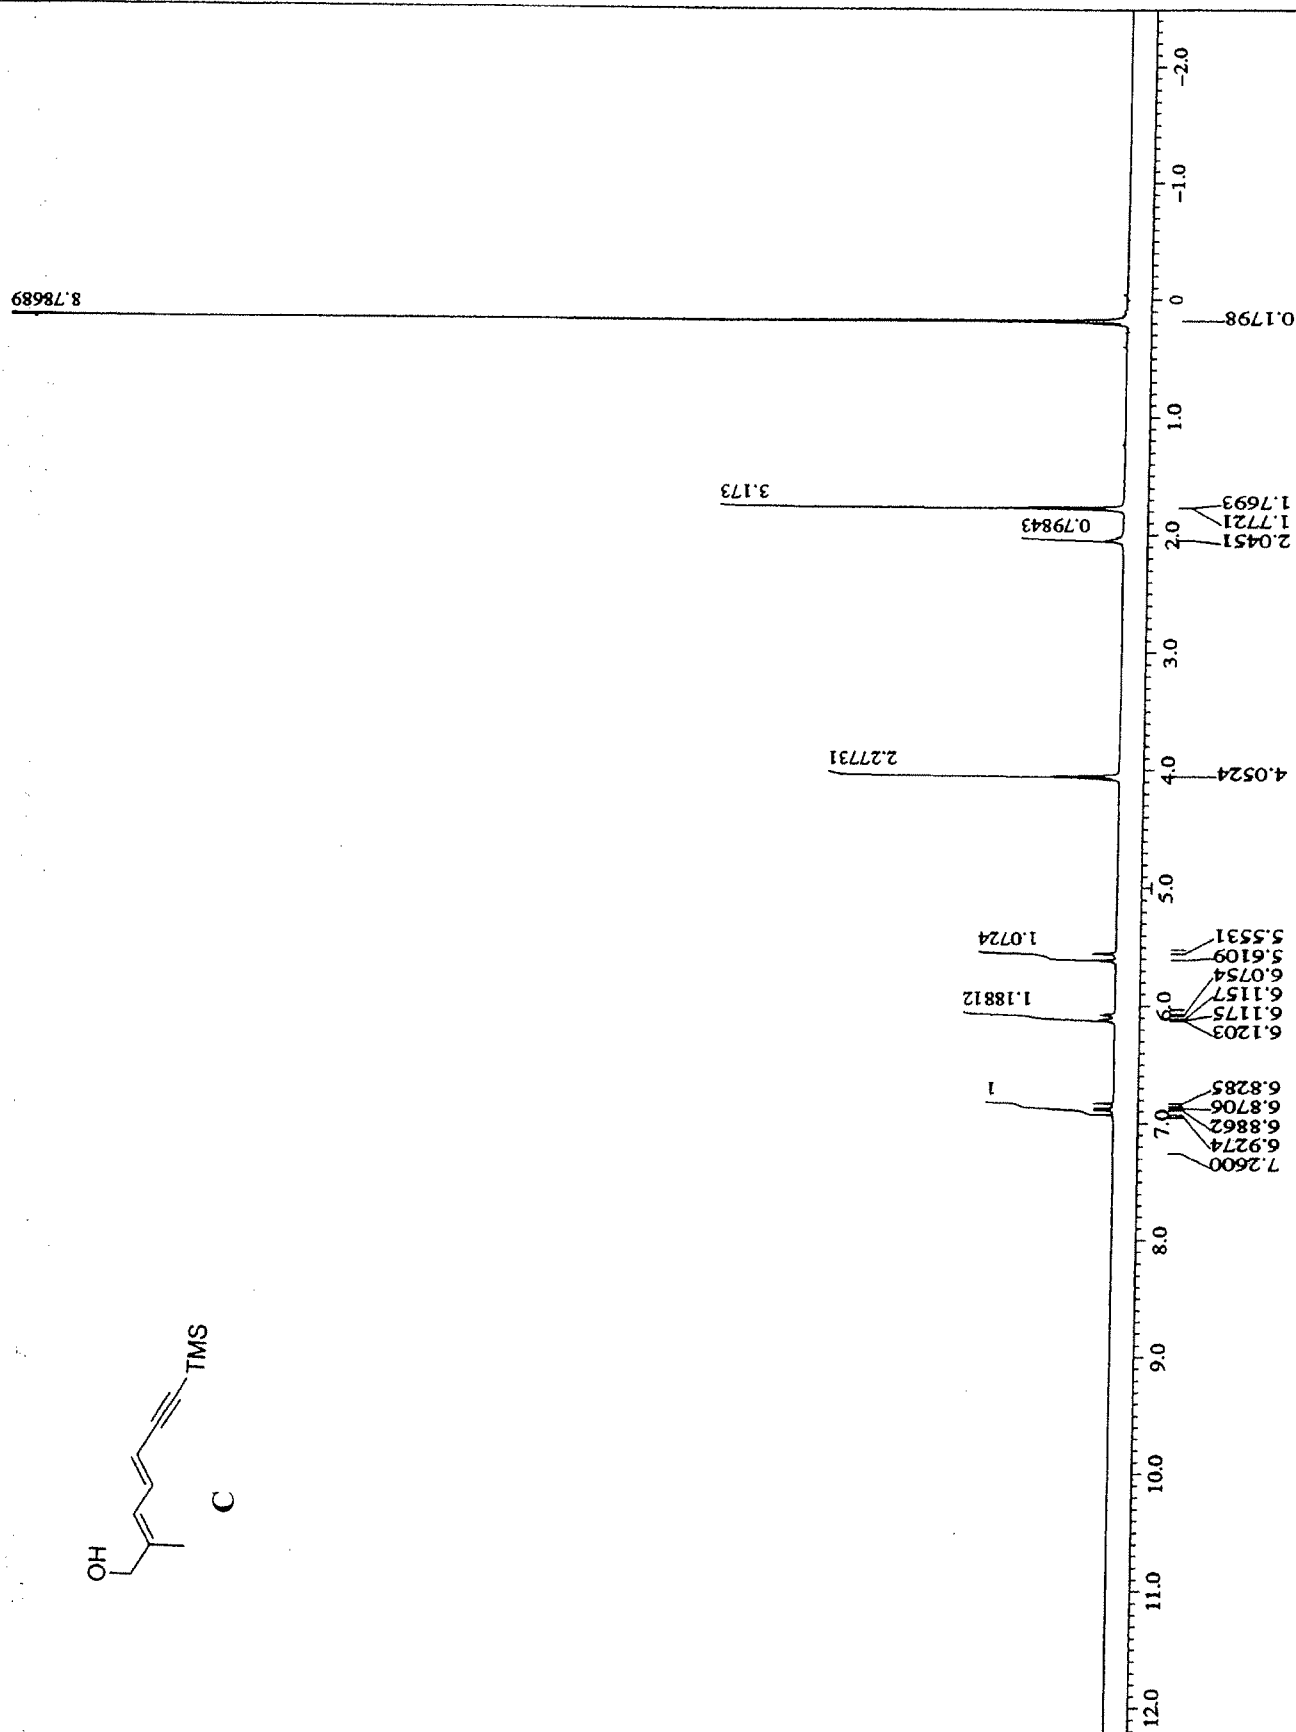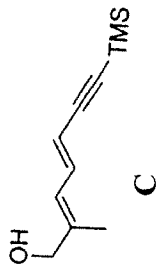

dg410C13.3

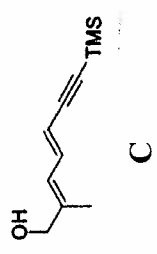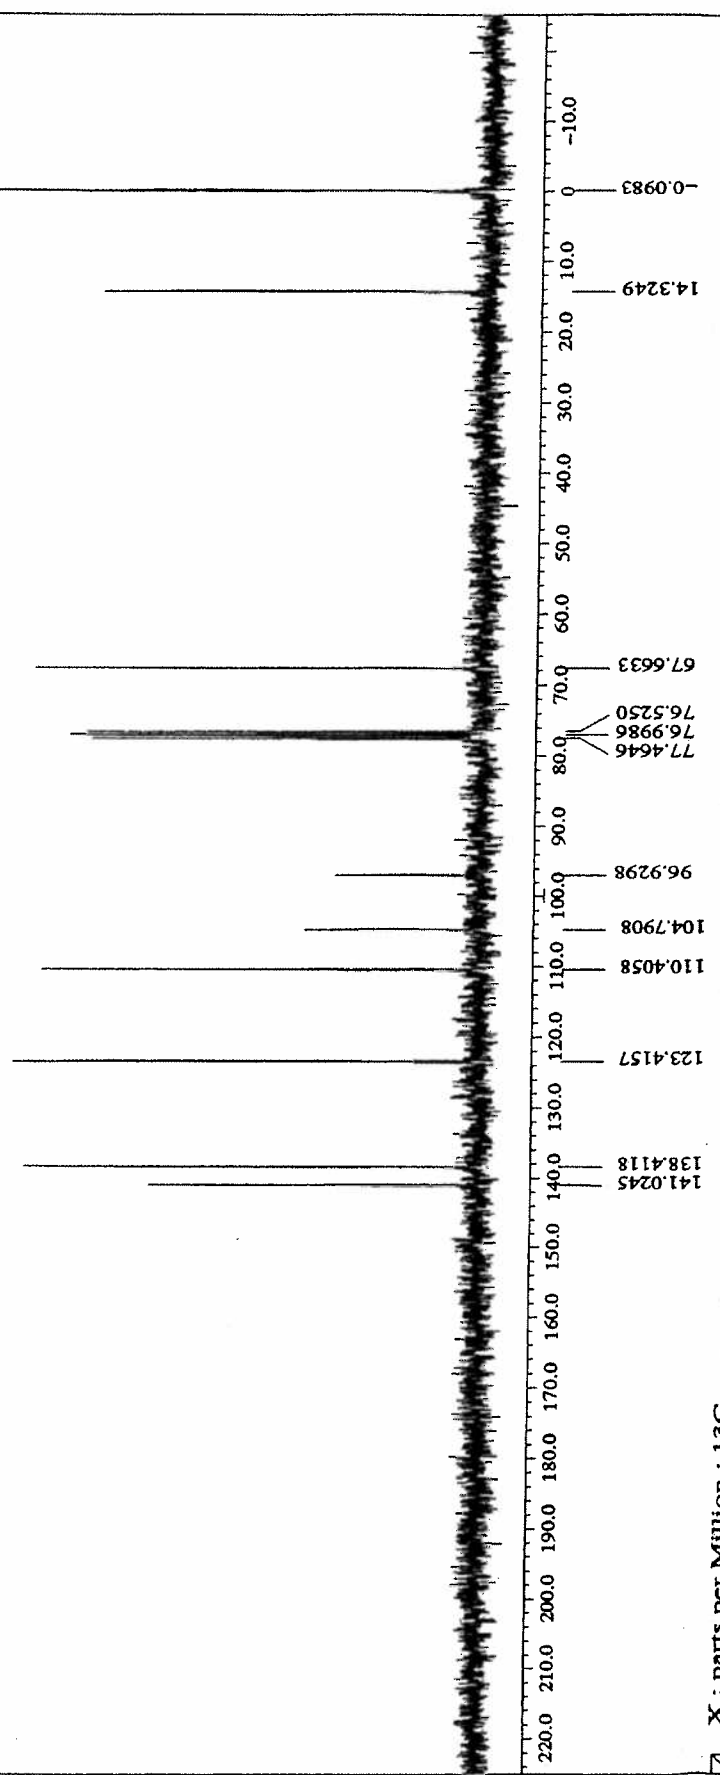

X : parts per Million : 13C

dg411crude3

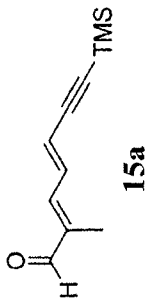

8.44728

3.2381

7.0932  
7.0511  
7.0364  
6.9943  
6.8486  
6.8459  
6.8440  
6.8037  
6.0671  
6.0103

1.0652

1.0281

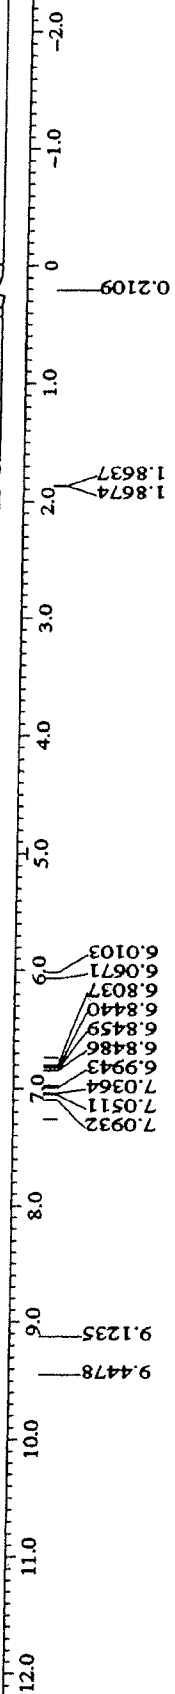

X : parts per Million : 1H

dg4113

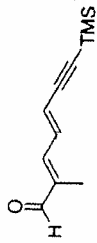

15a

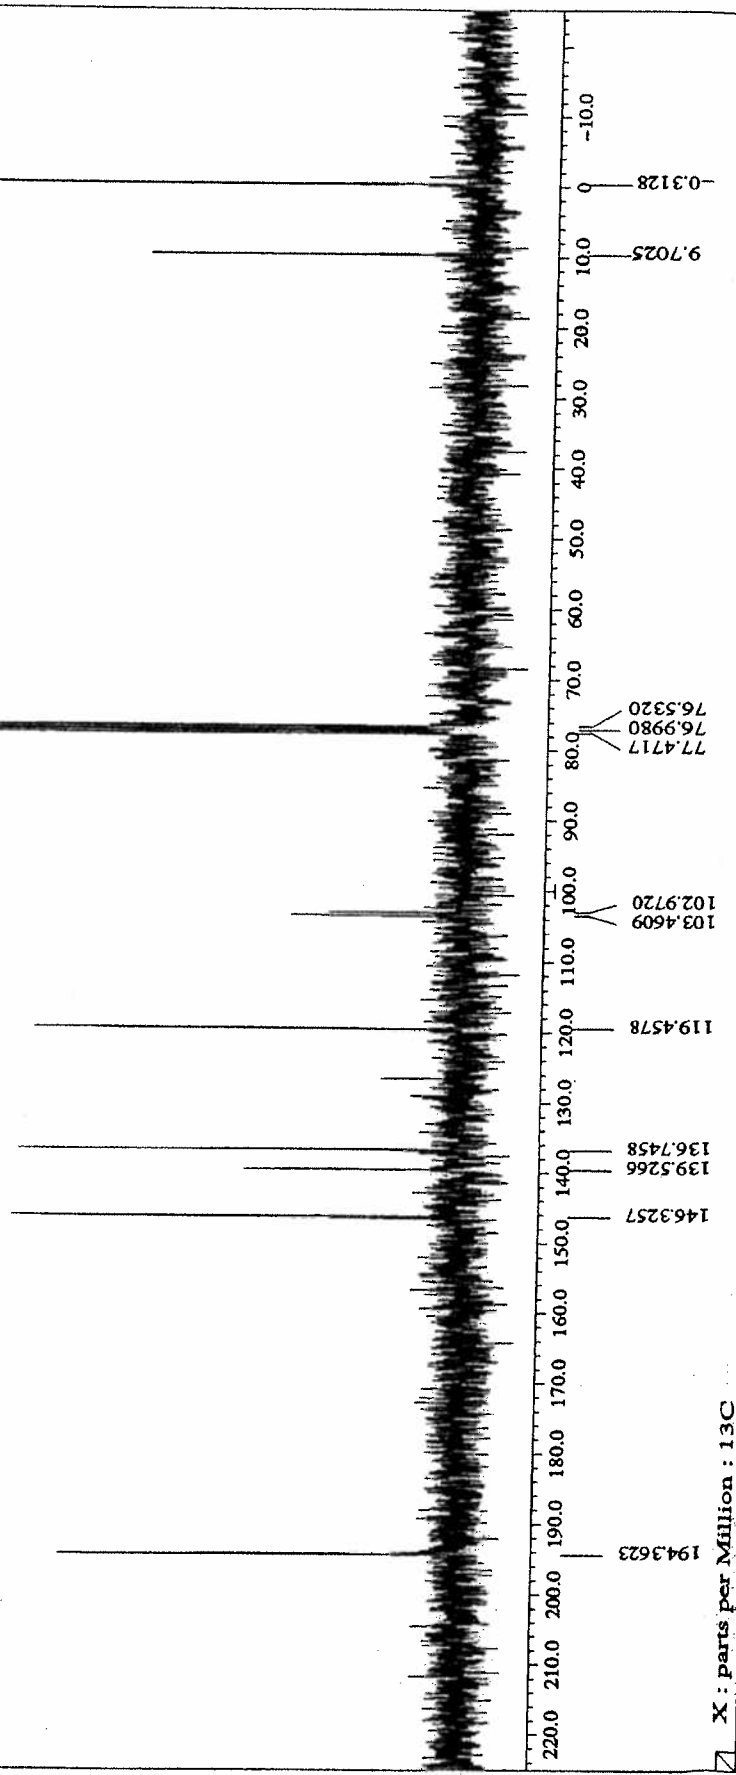

X : parts per Million : 13C

dg412.3

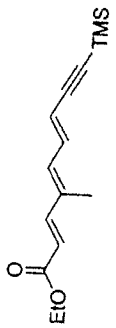

10

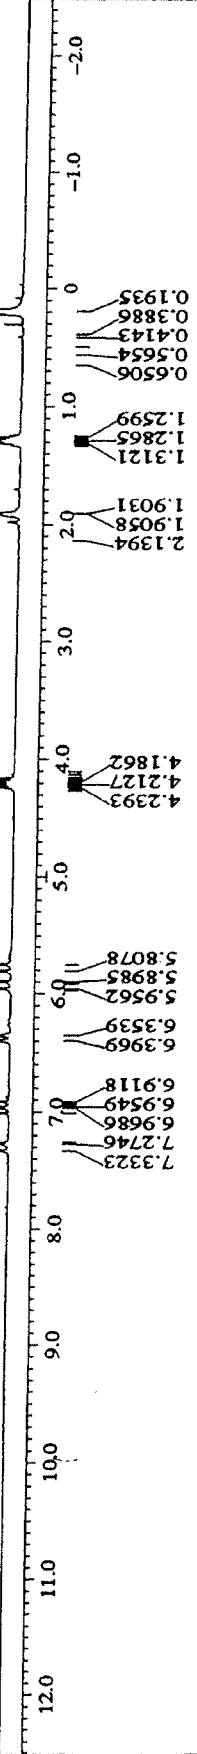

X : parts per Million : 1H

dg412c13.3

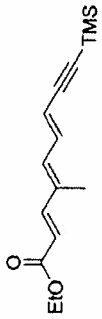

10

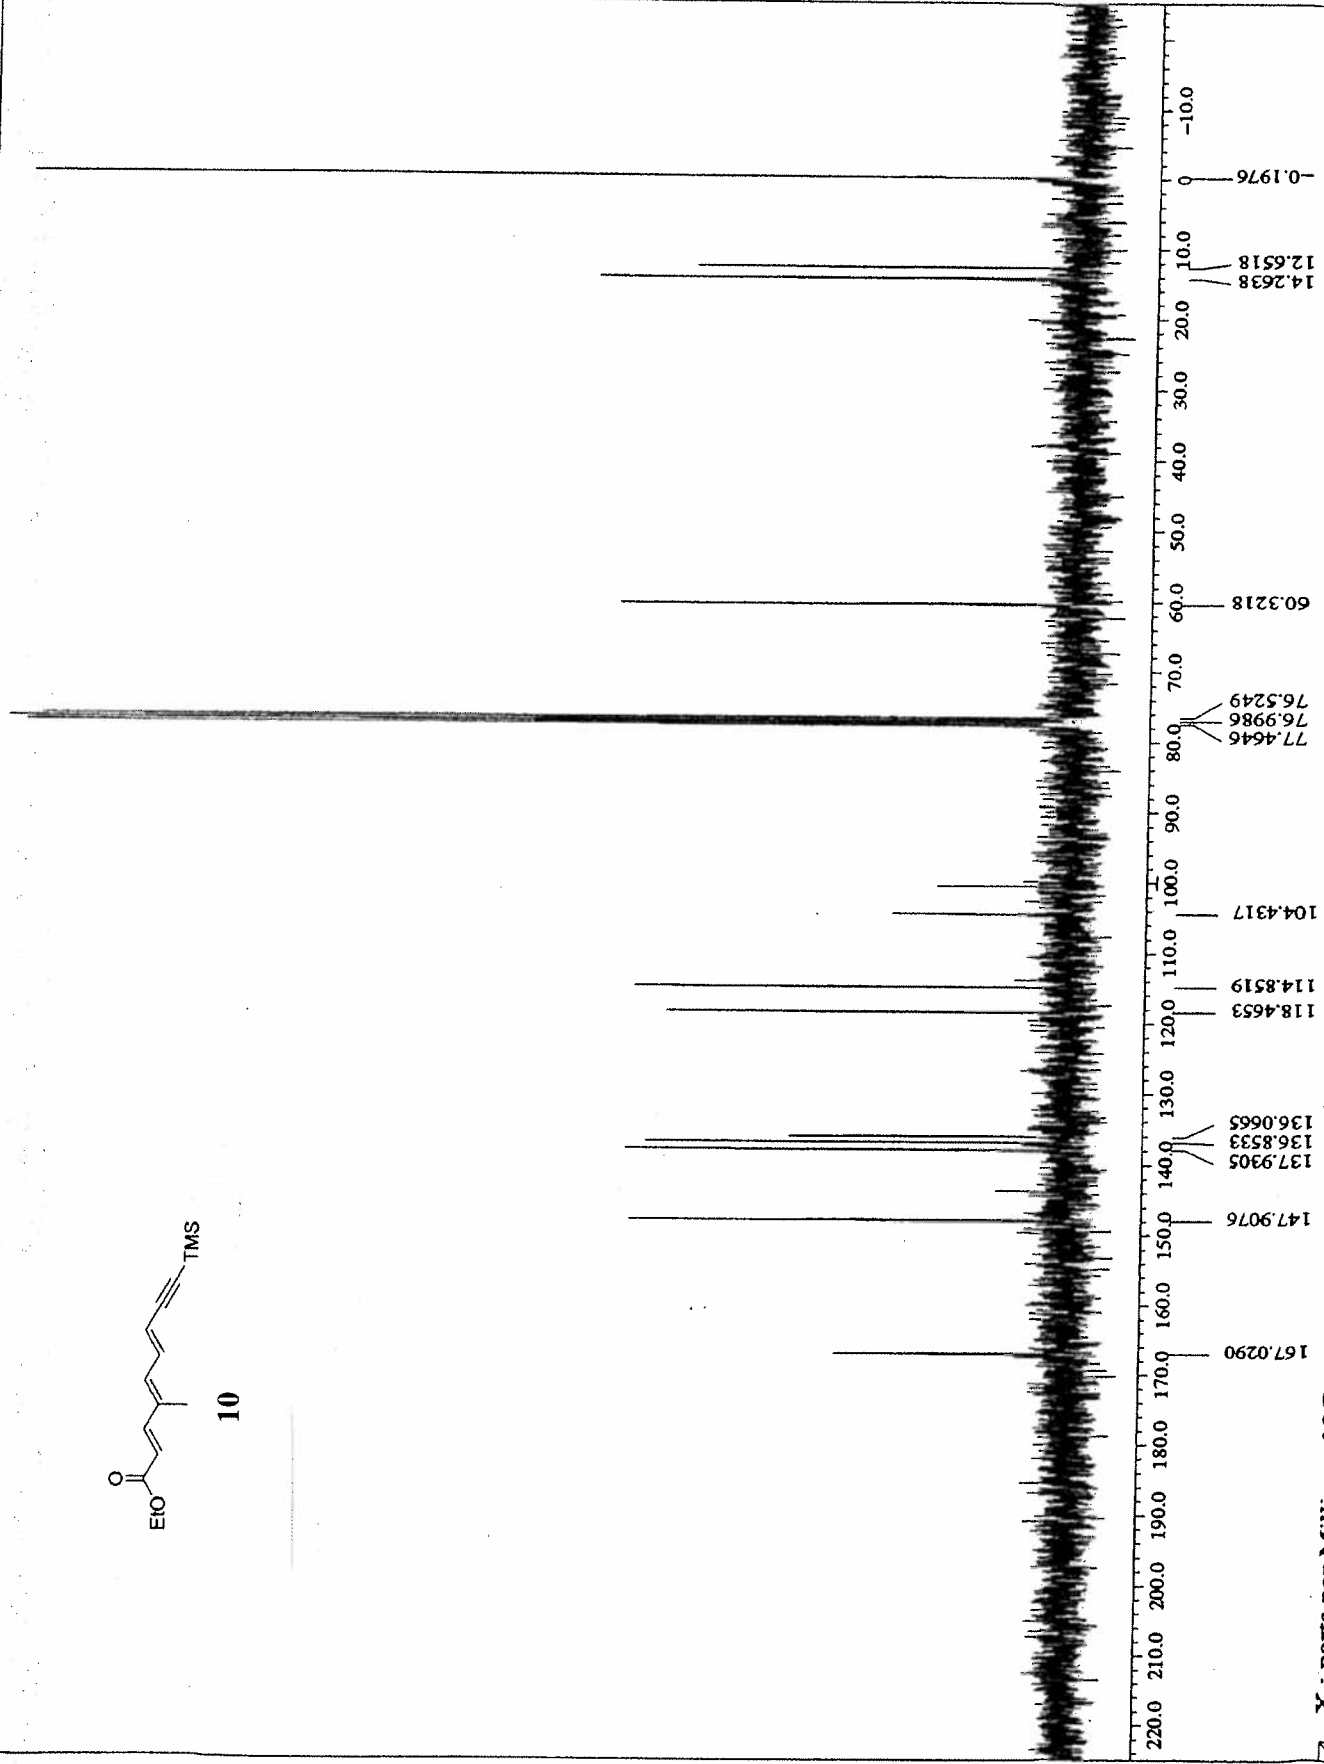

X : parts per Million : 13C

dg413.4

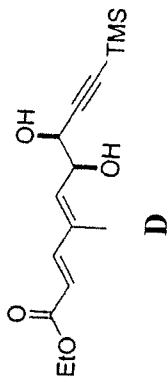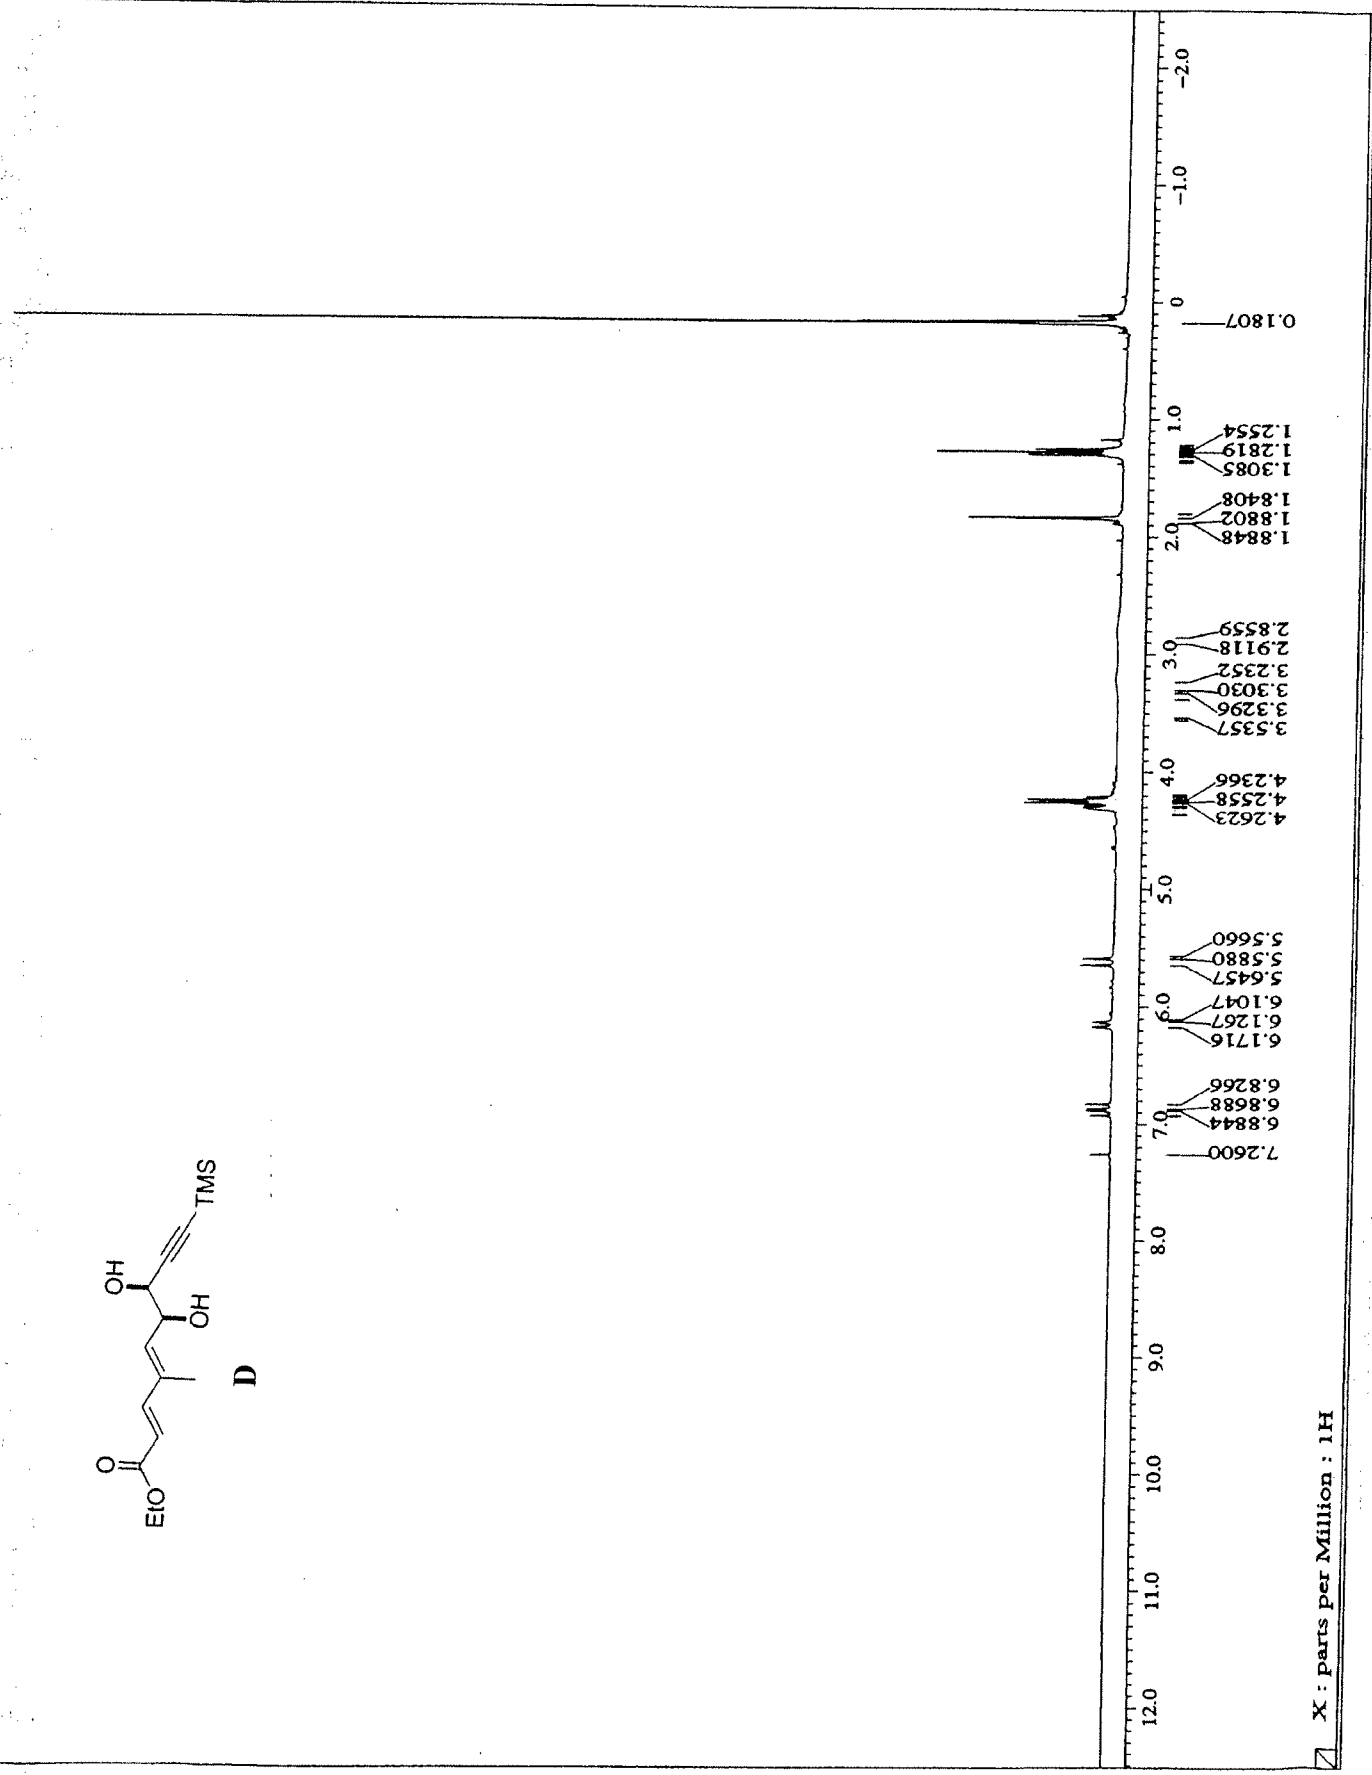

X : Parts per Million : 1H



dg413c13.3

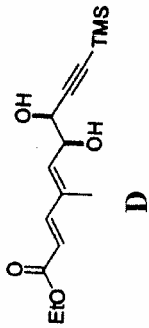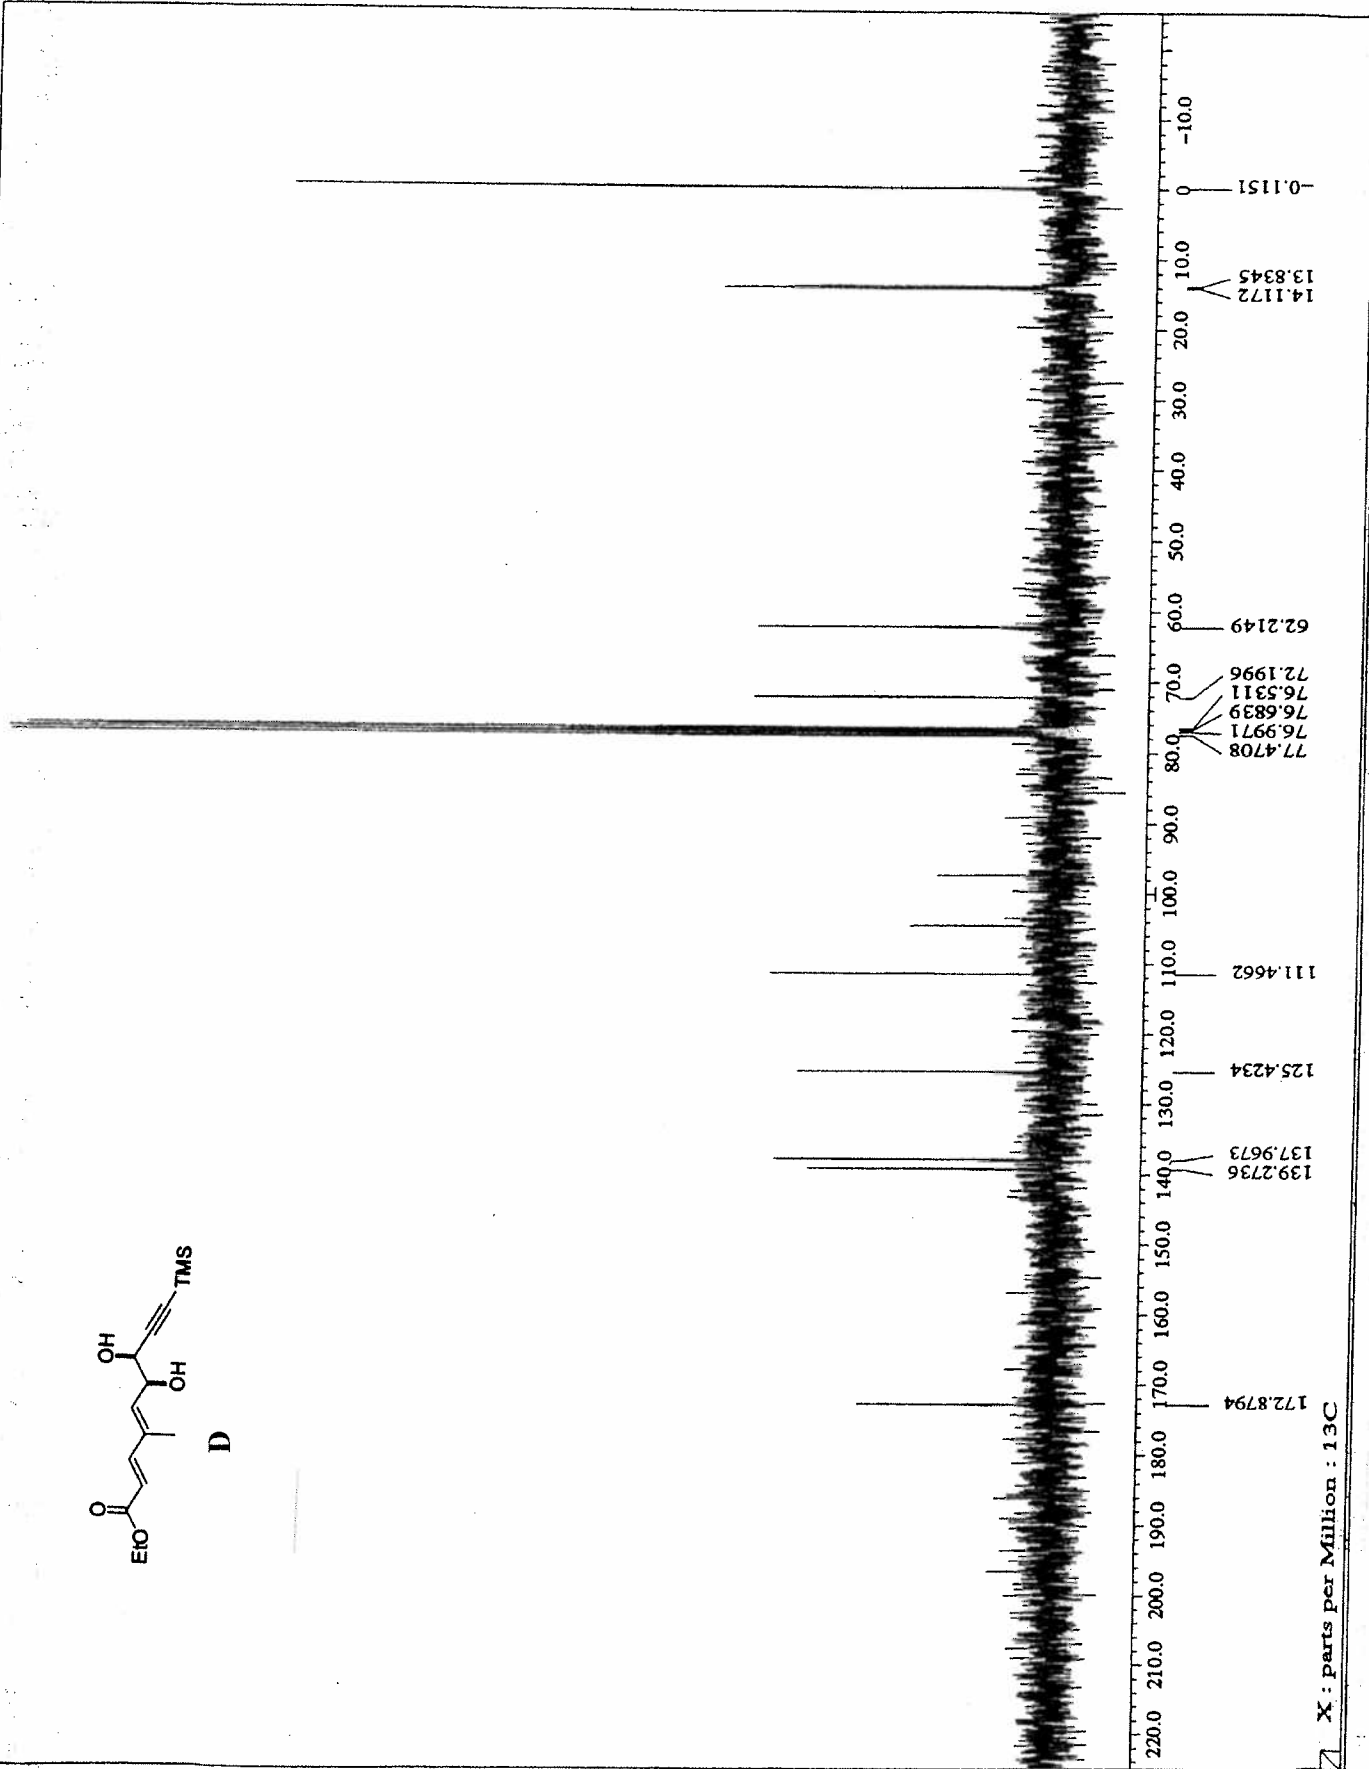

X: parts per Million : 13C

X : parts per Million : 1H

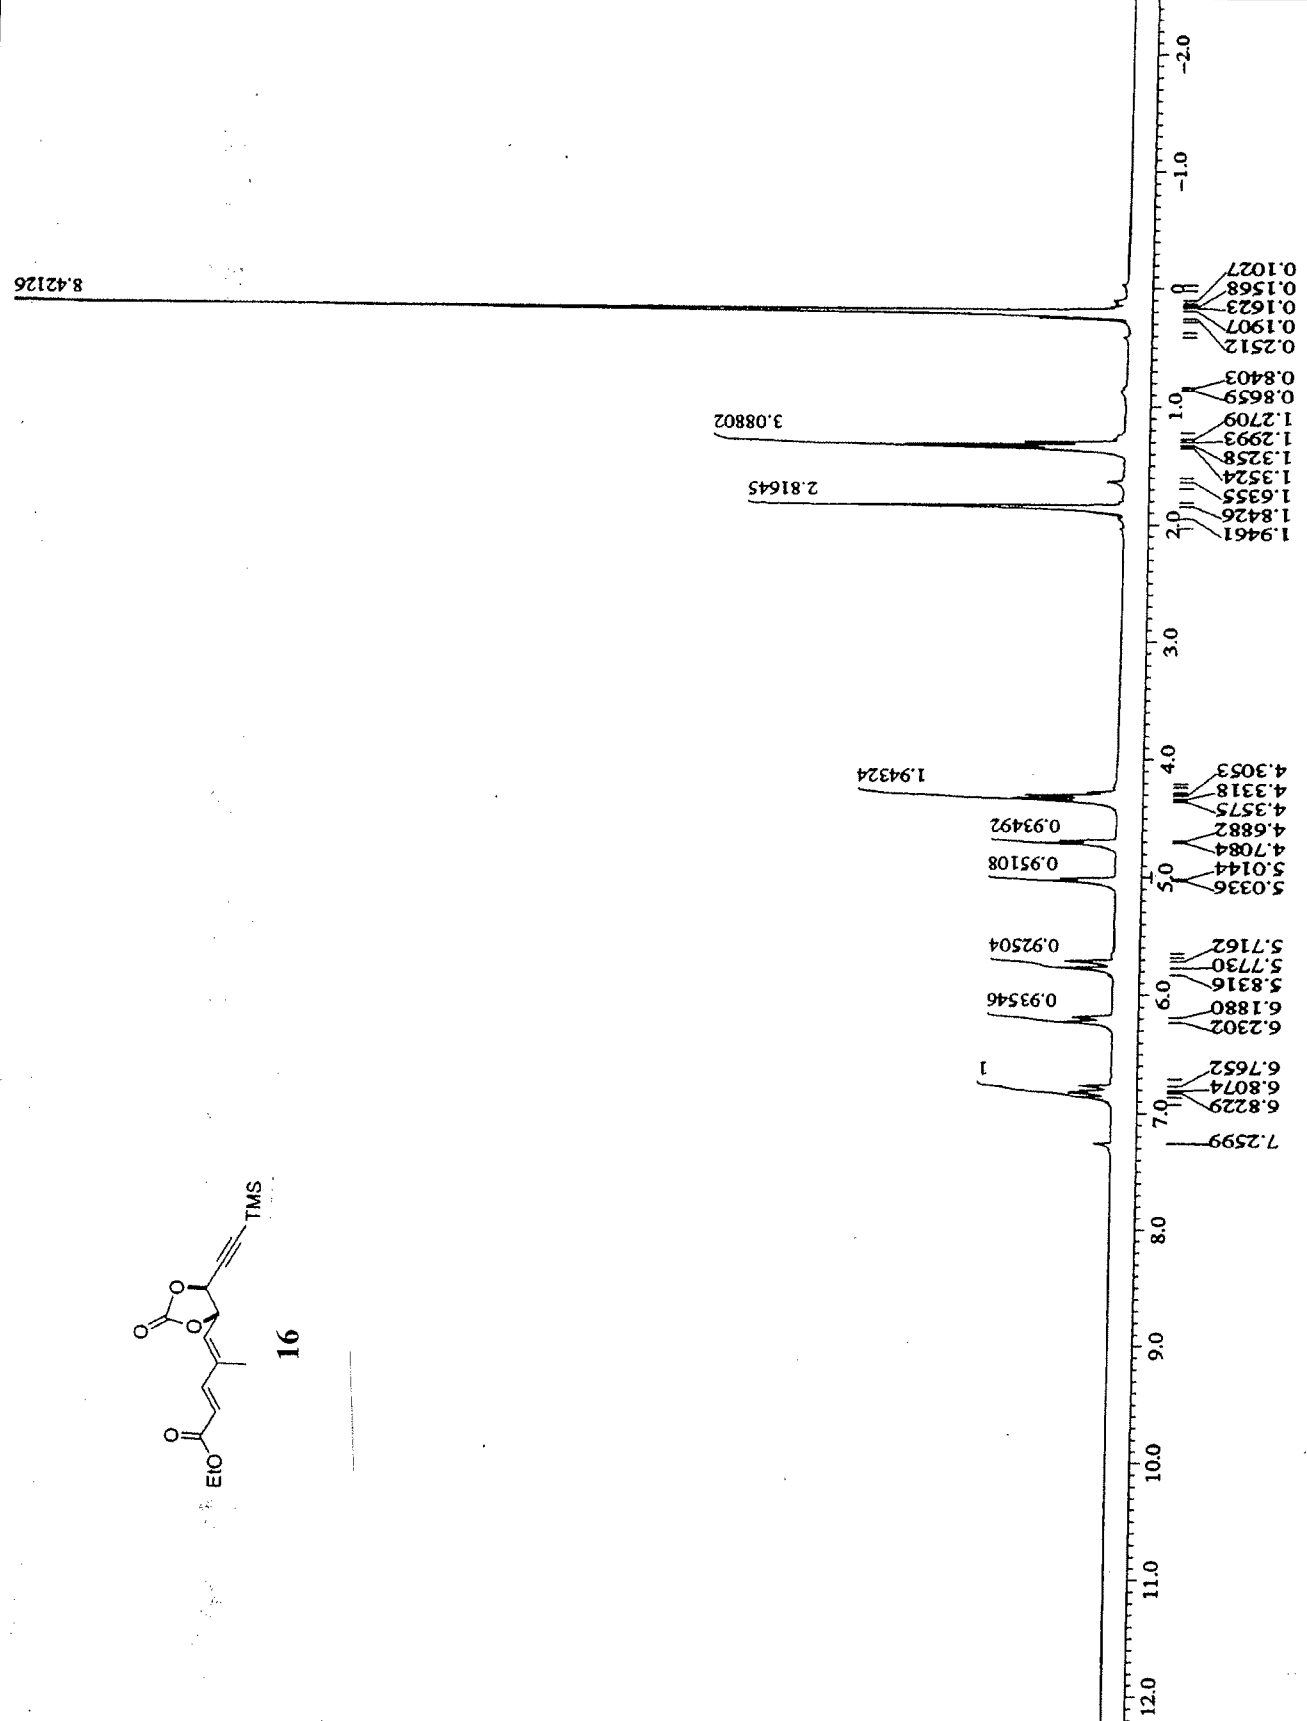

dg415c13.3

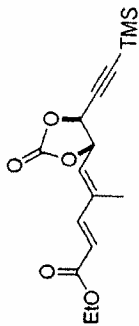

16

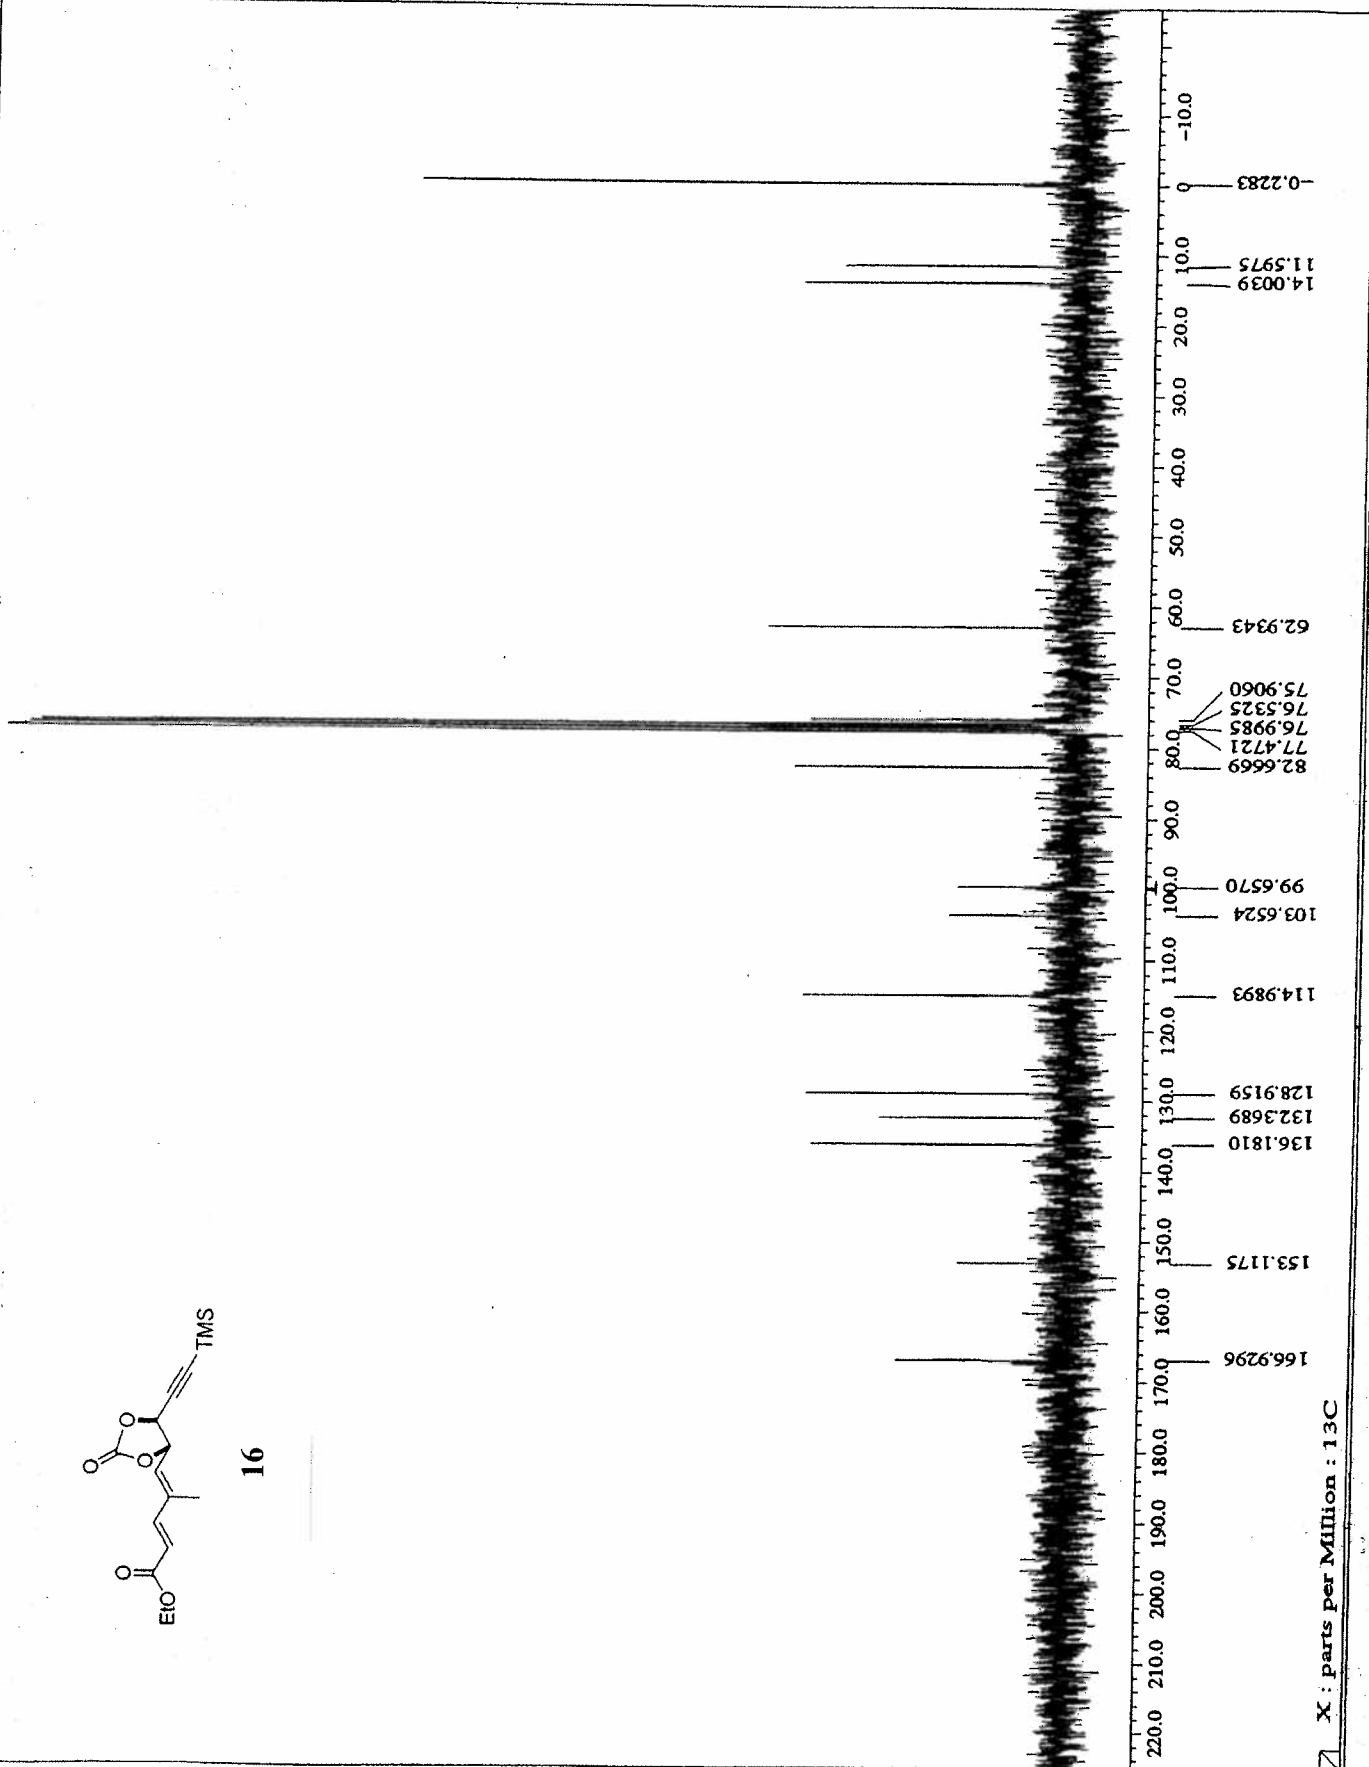

dg417b.3

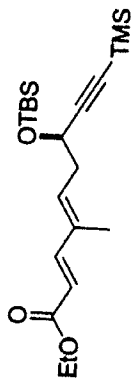

17

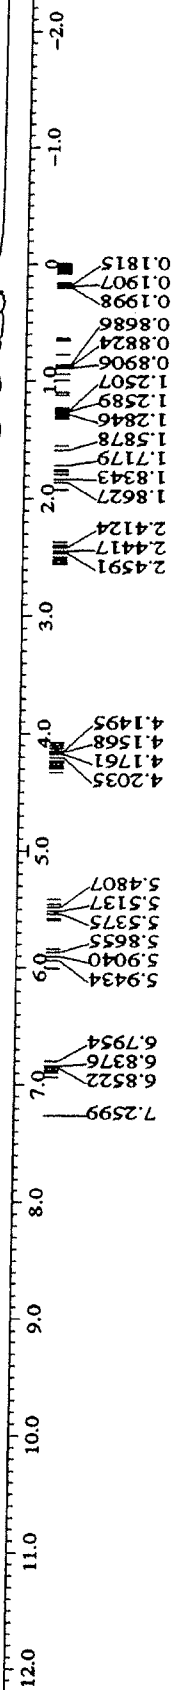

X : parts per Million : 1H

dg417b.4

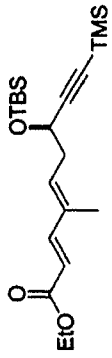

17

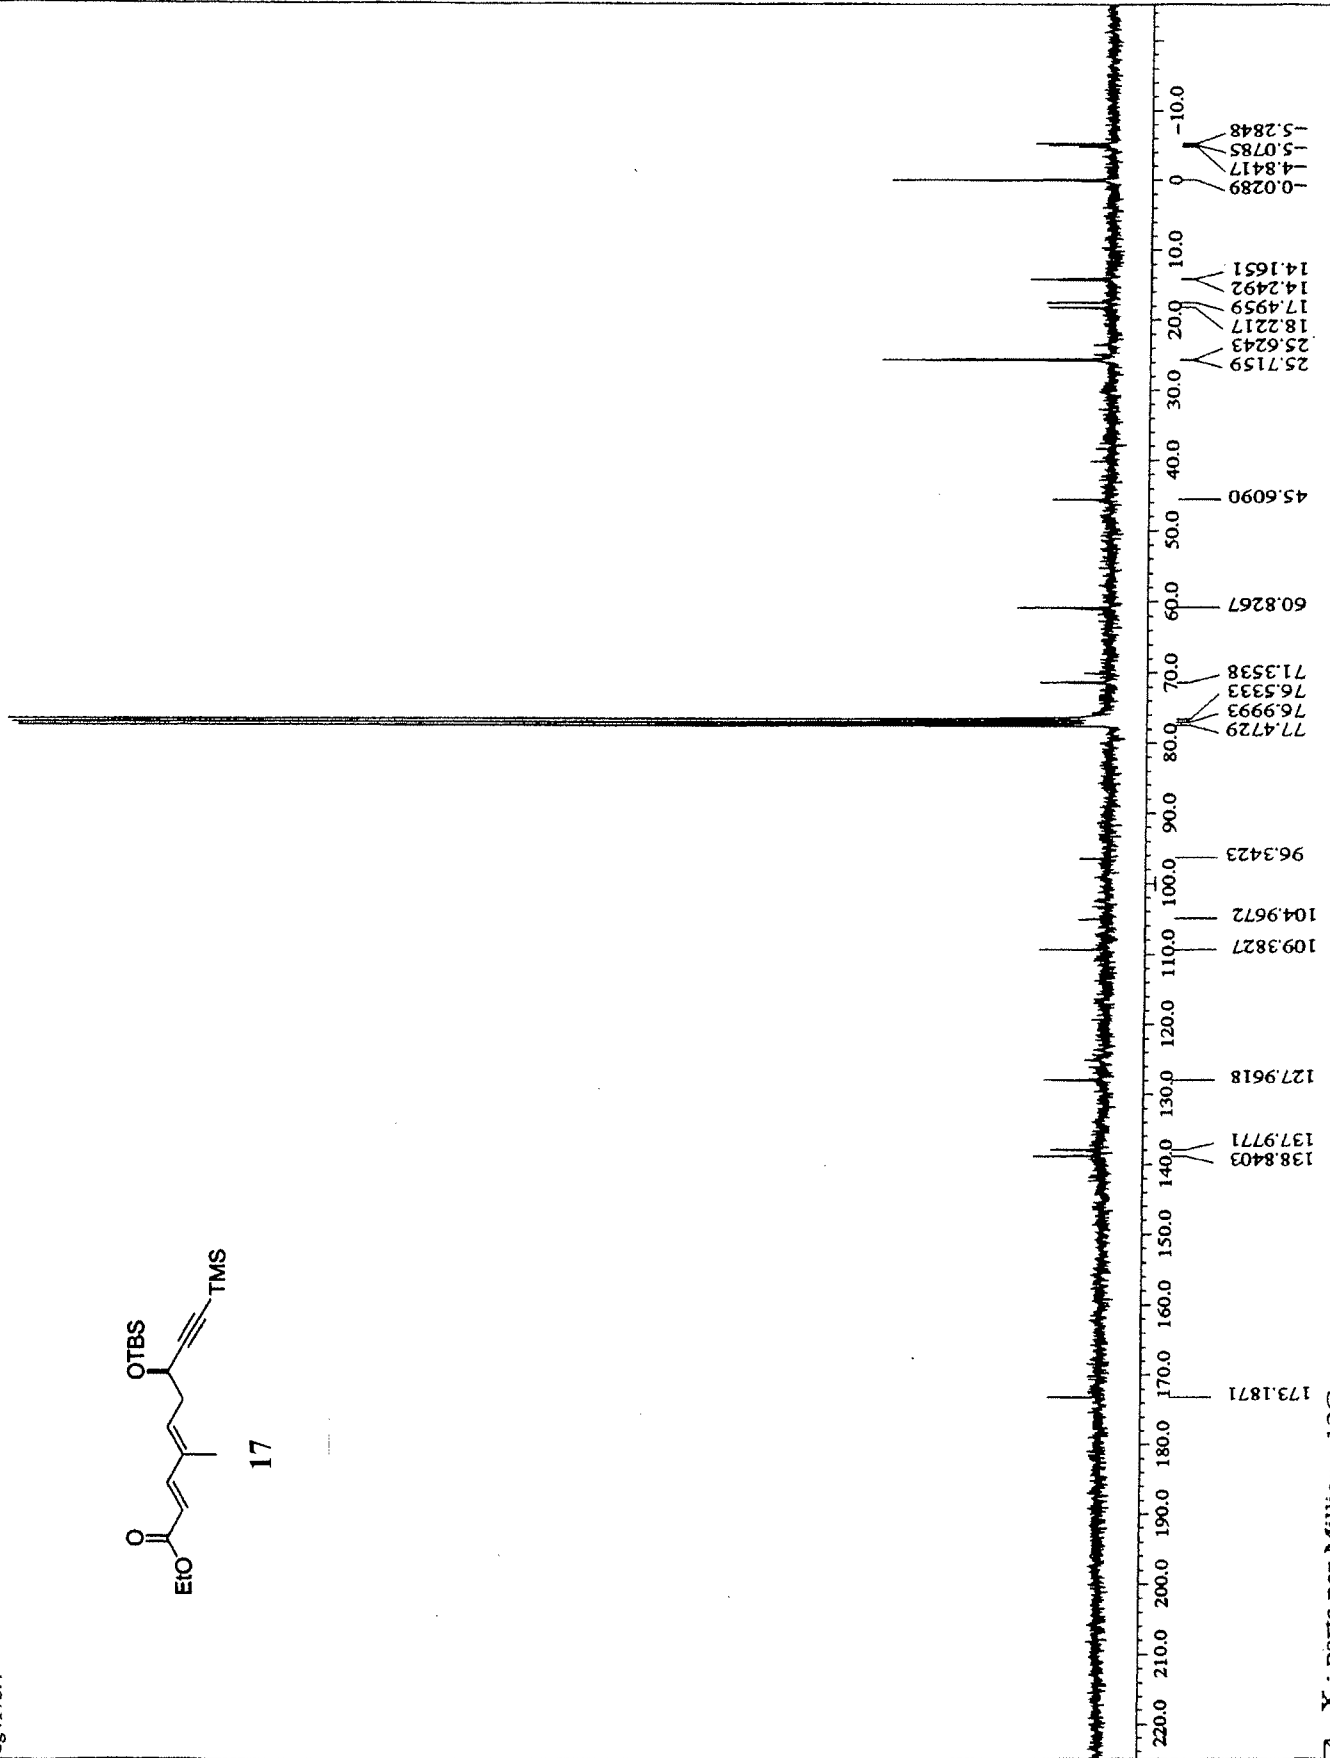

X : parts per Million :  $^{13}\text{C}$

dgTBSDIOL\_3

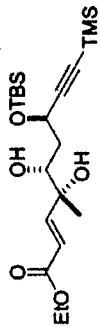

E

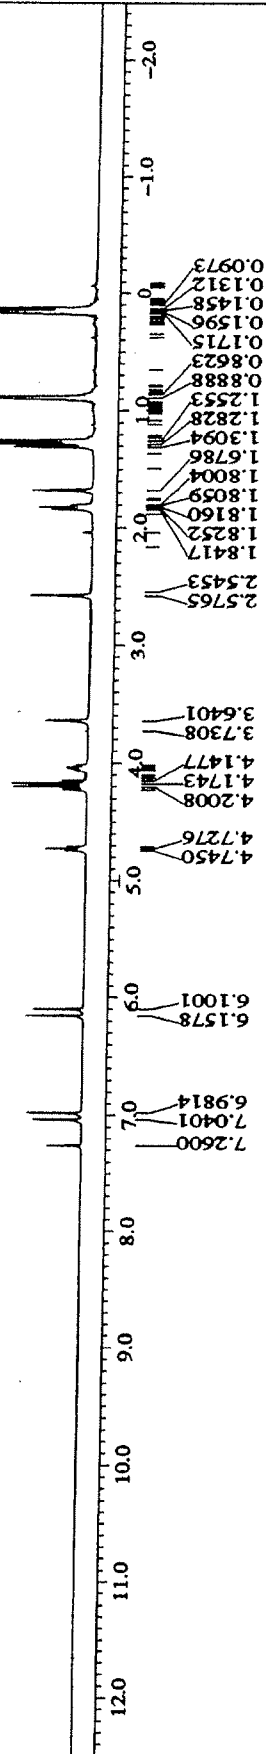

X : parts per Million : 1H

dgtsdiolc13.3

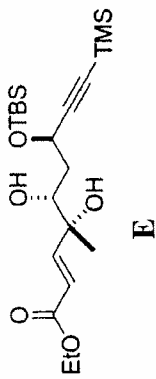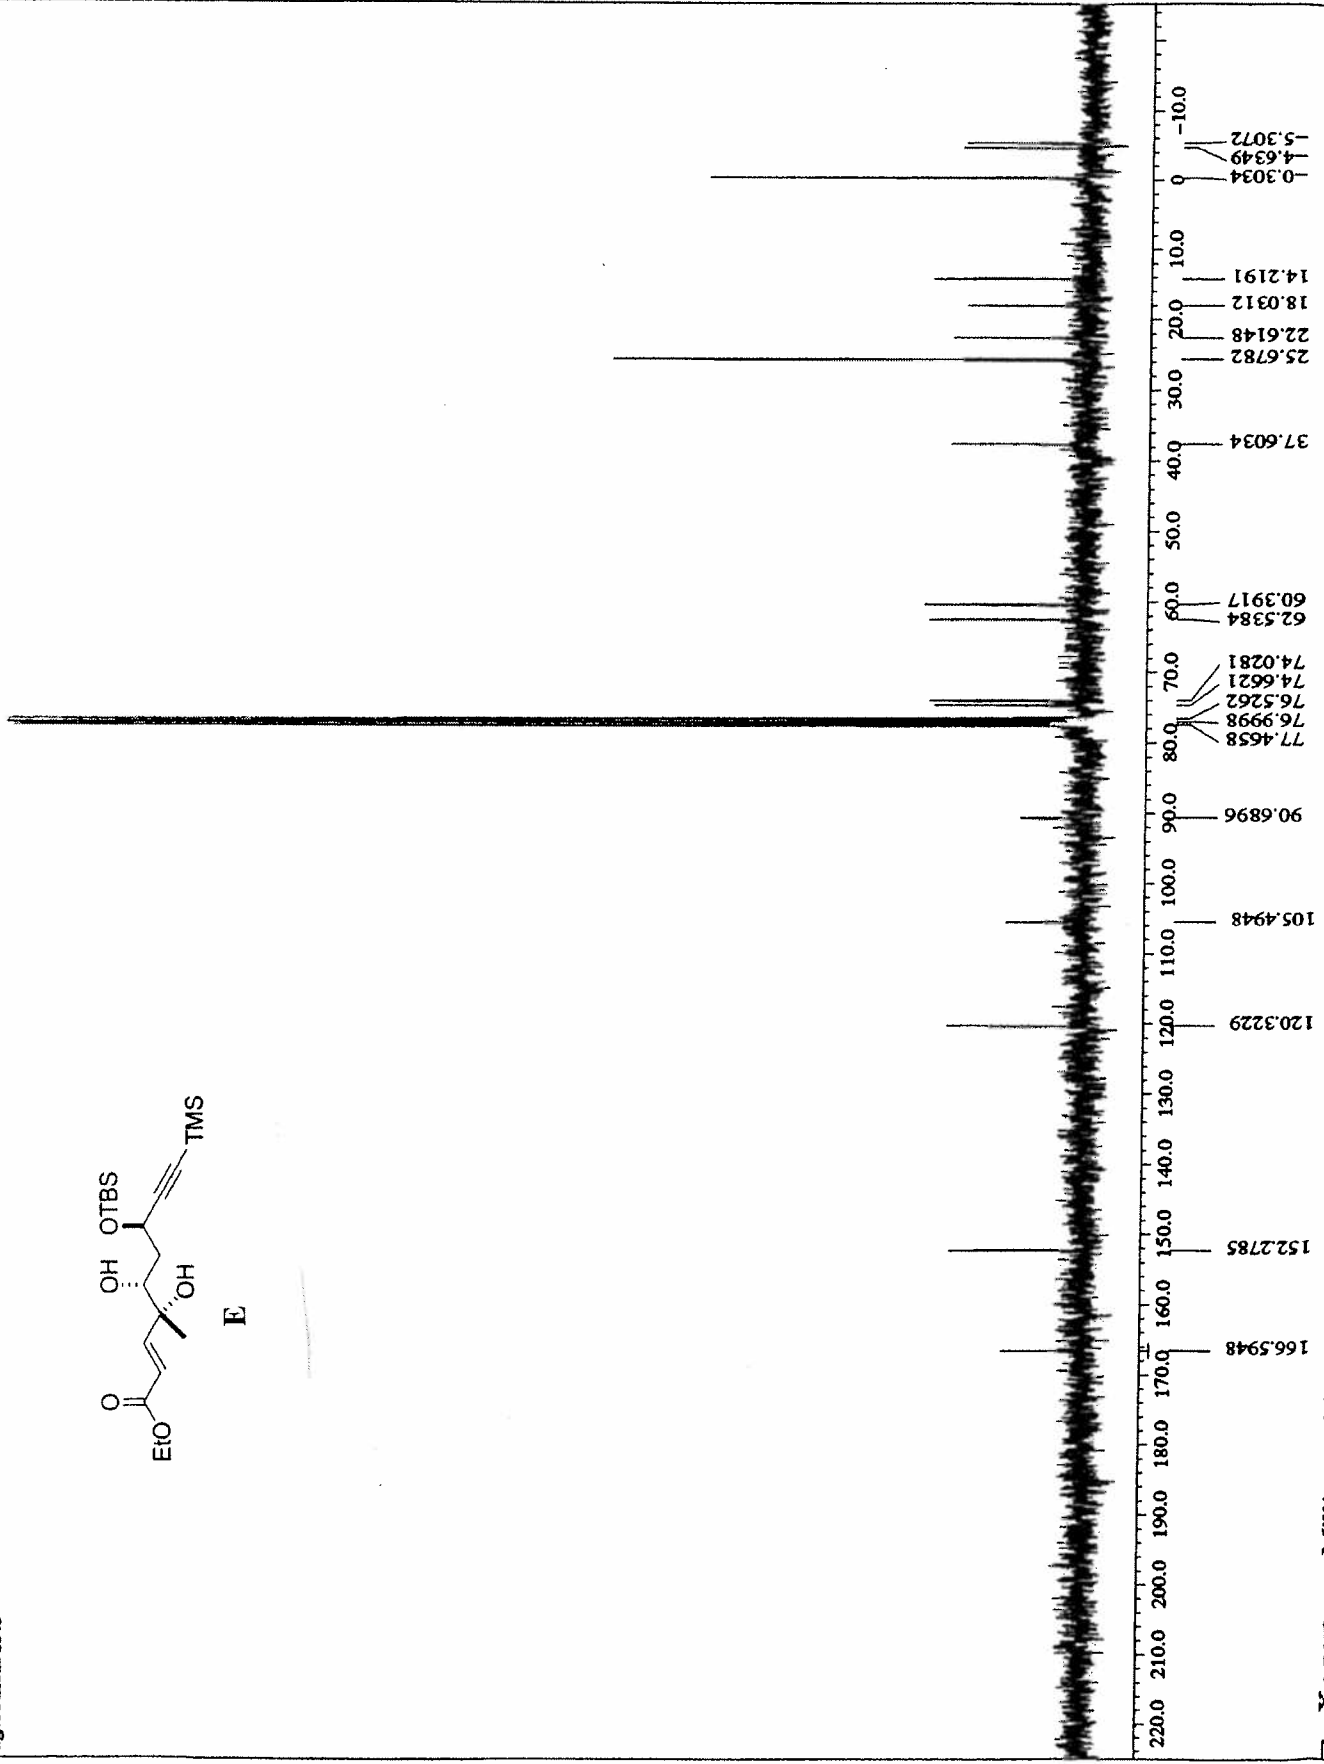

X : parts per Million : 13C

dg457.3

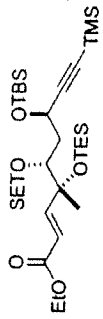

18

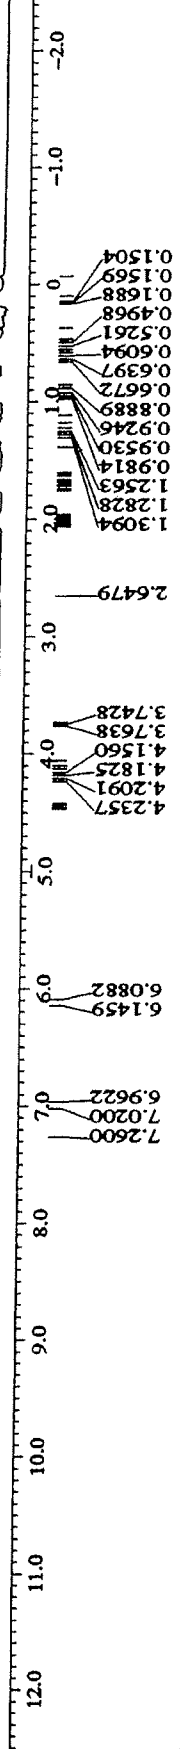

X : parts per Million : 1H



dg458c13.3

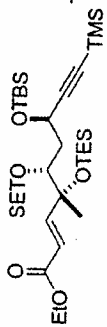

18

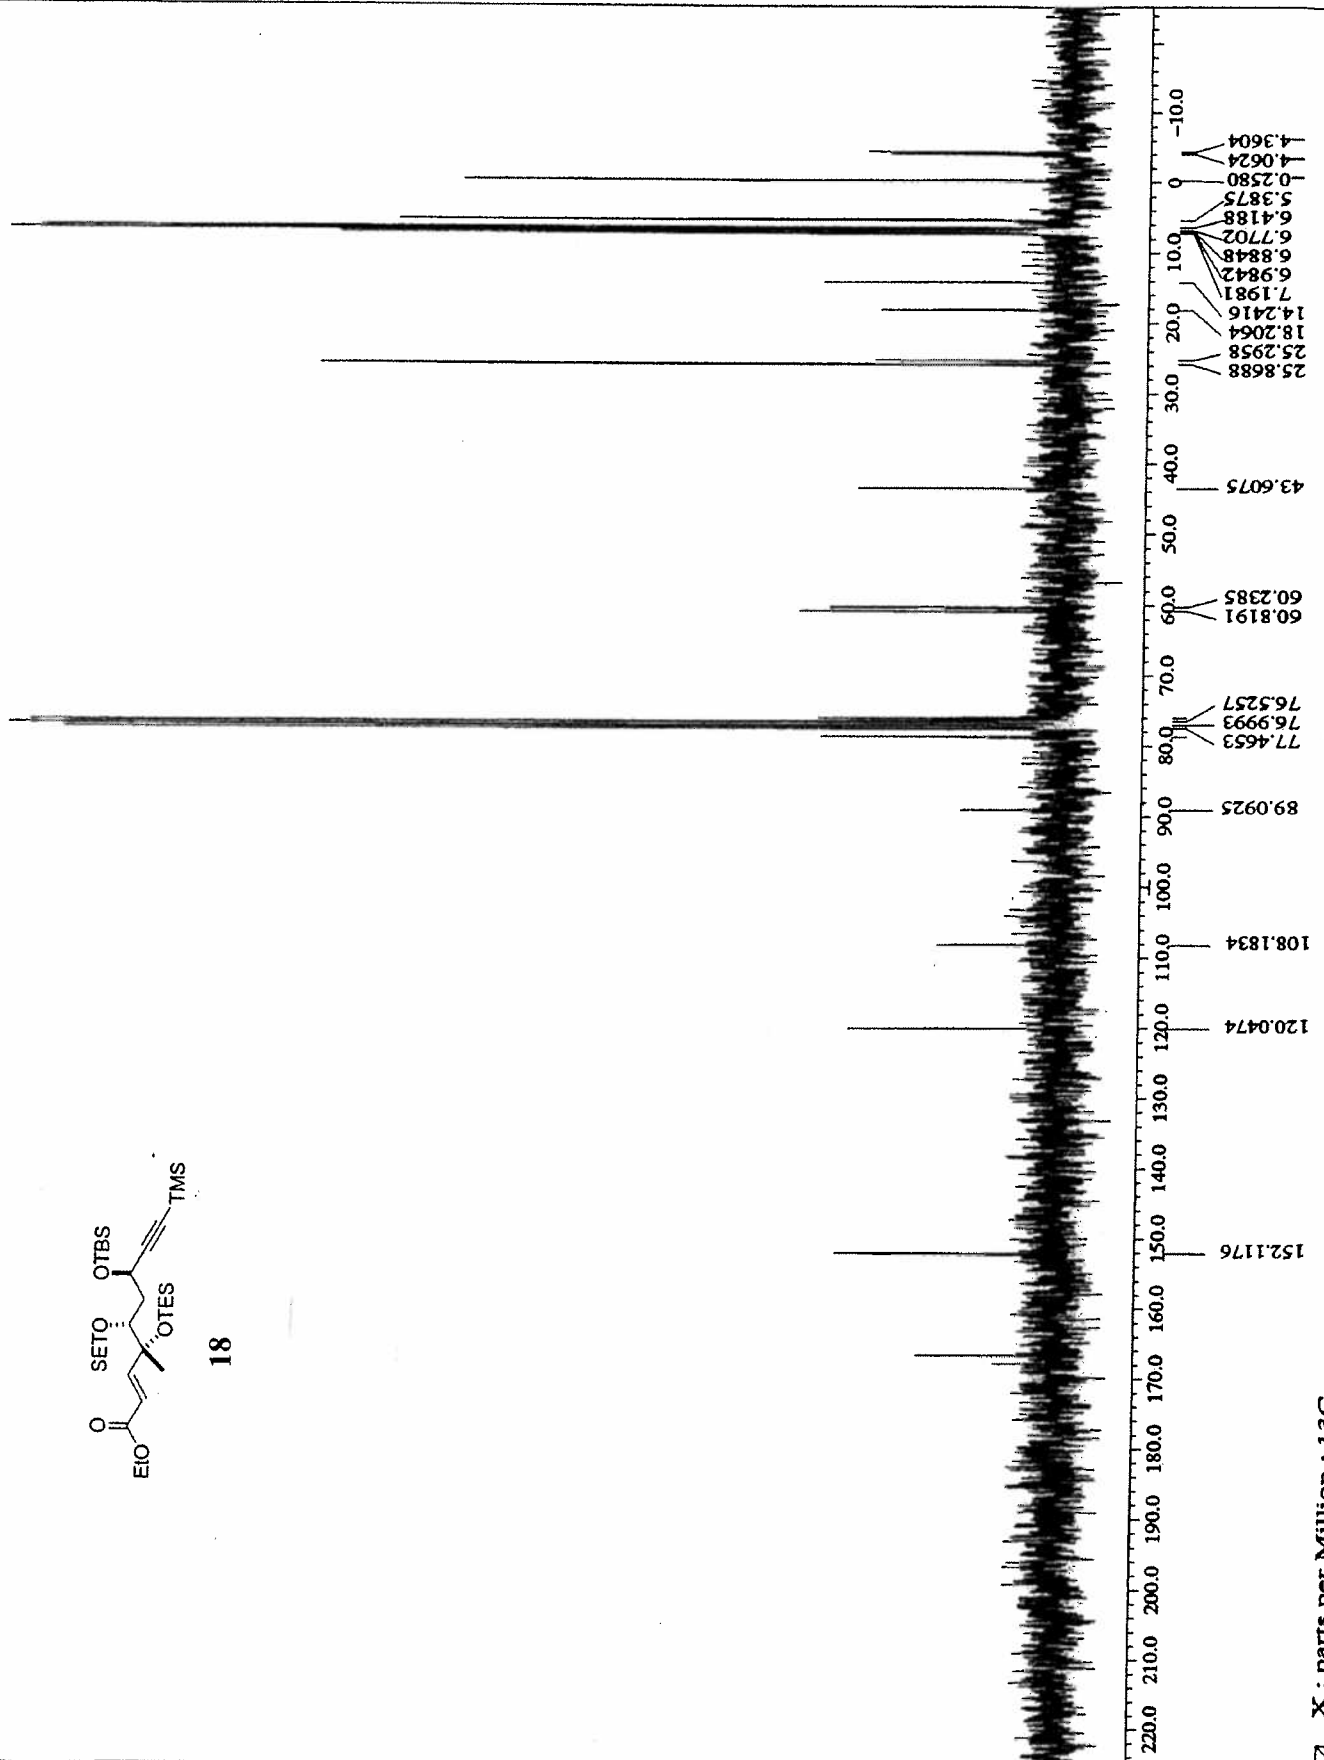

X : parts per Million : 13C

dg460.3

30.0

20.0

10.0

(Millions)

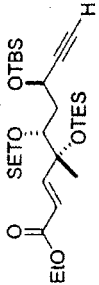

19

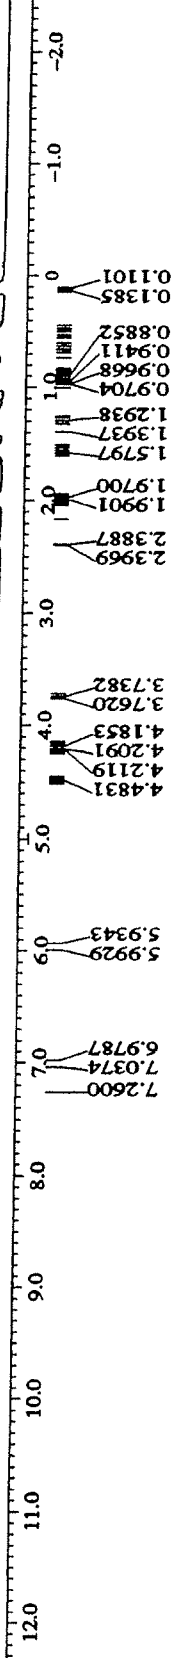

X : parts per Million : 1H

dg460C13.4

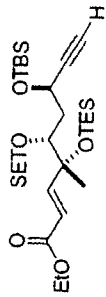

19

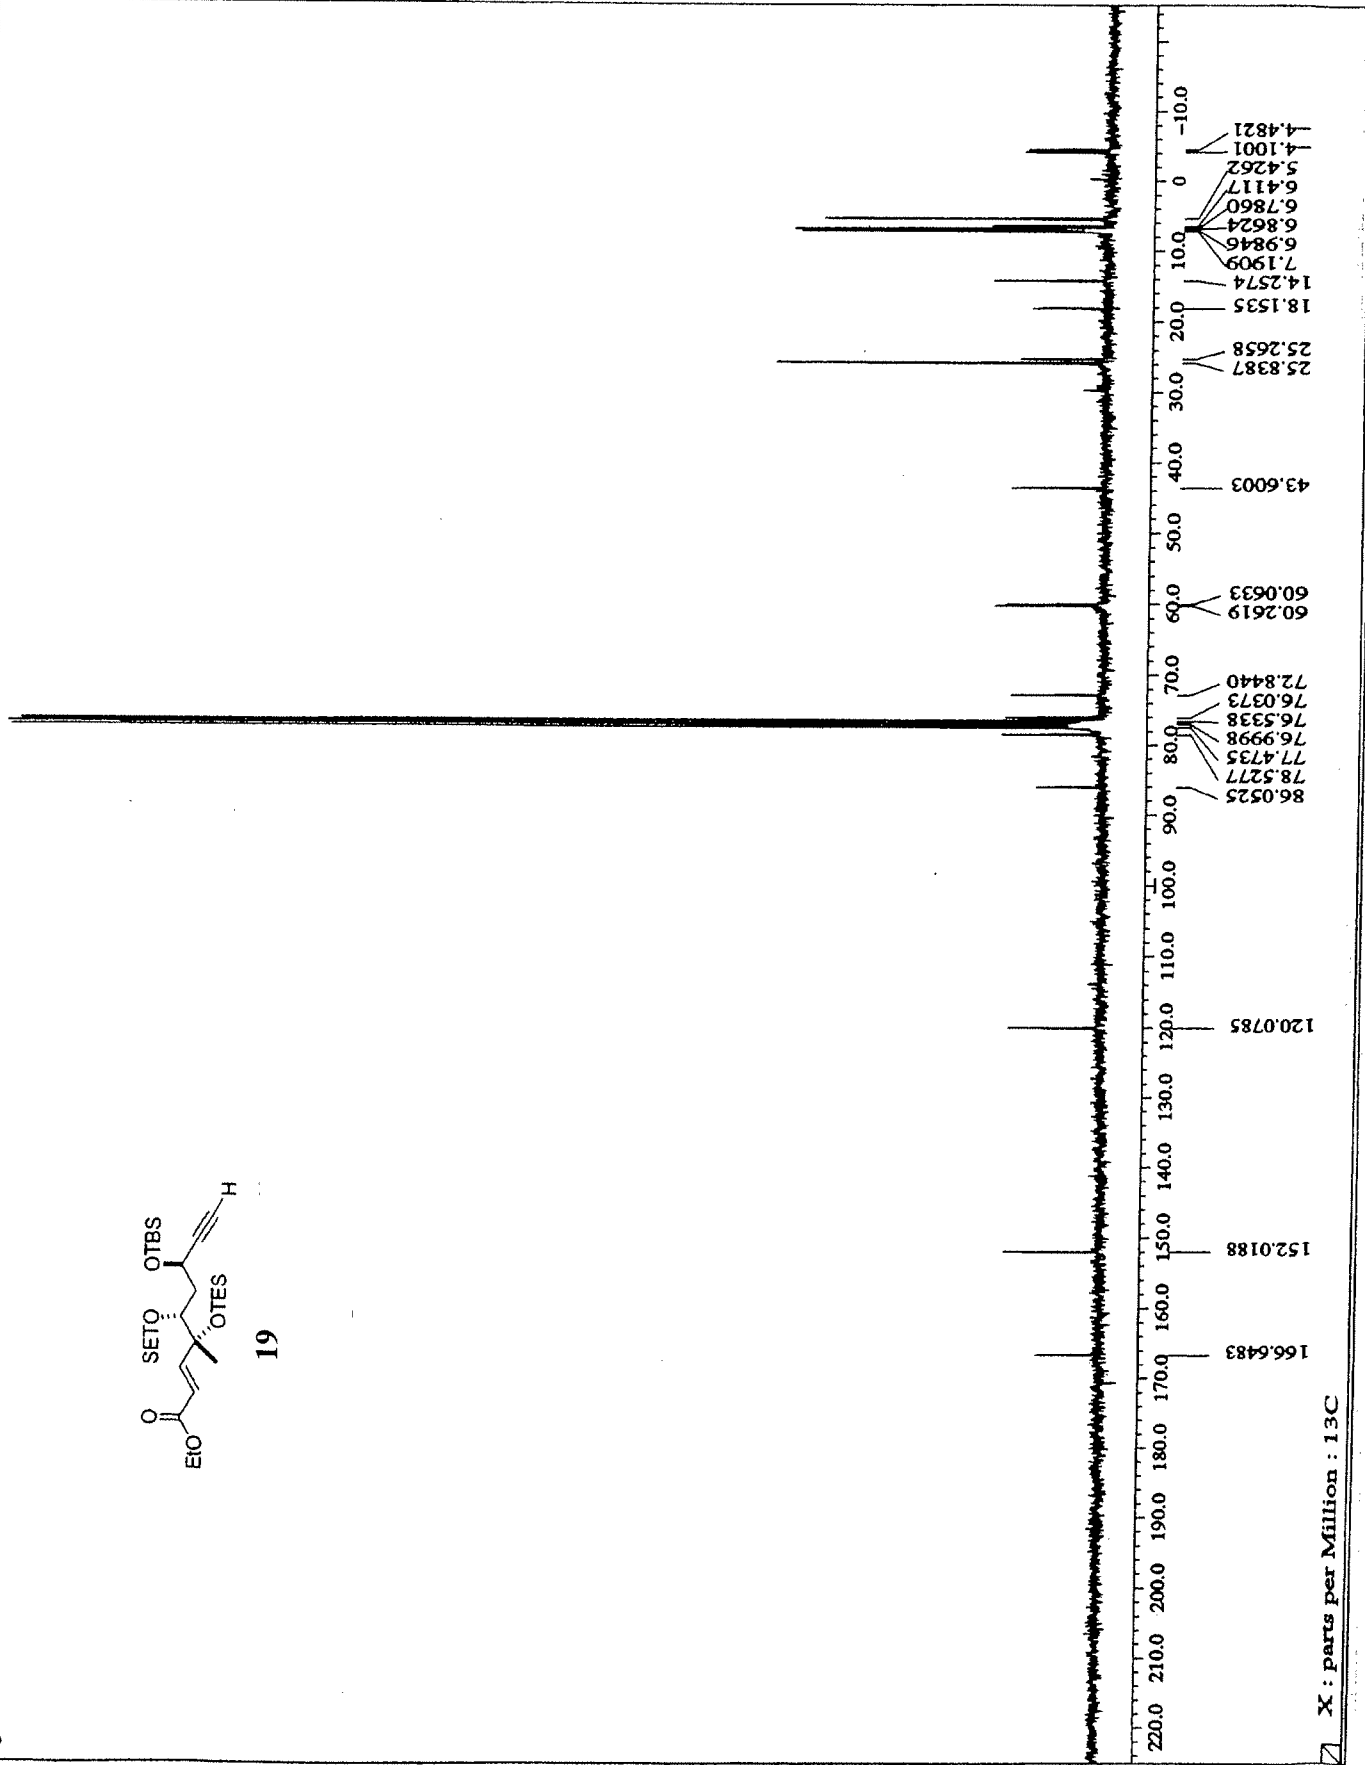

X : parts per Million : 13C

dg401.5

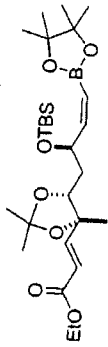

23

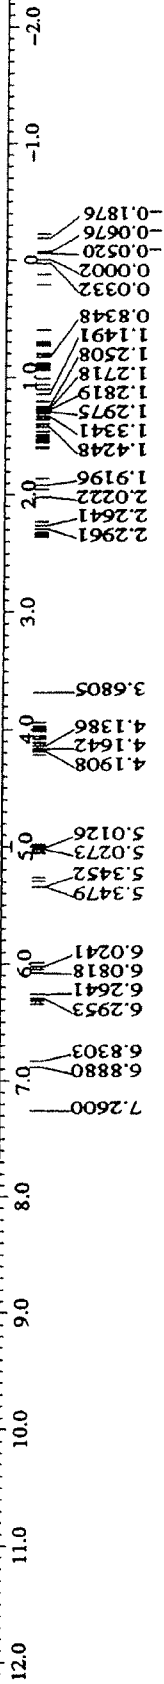

X : parts per Million : 1H

dg401c13.4

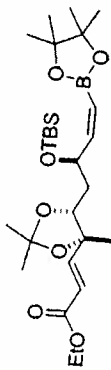

23

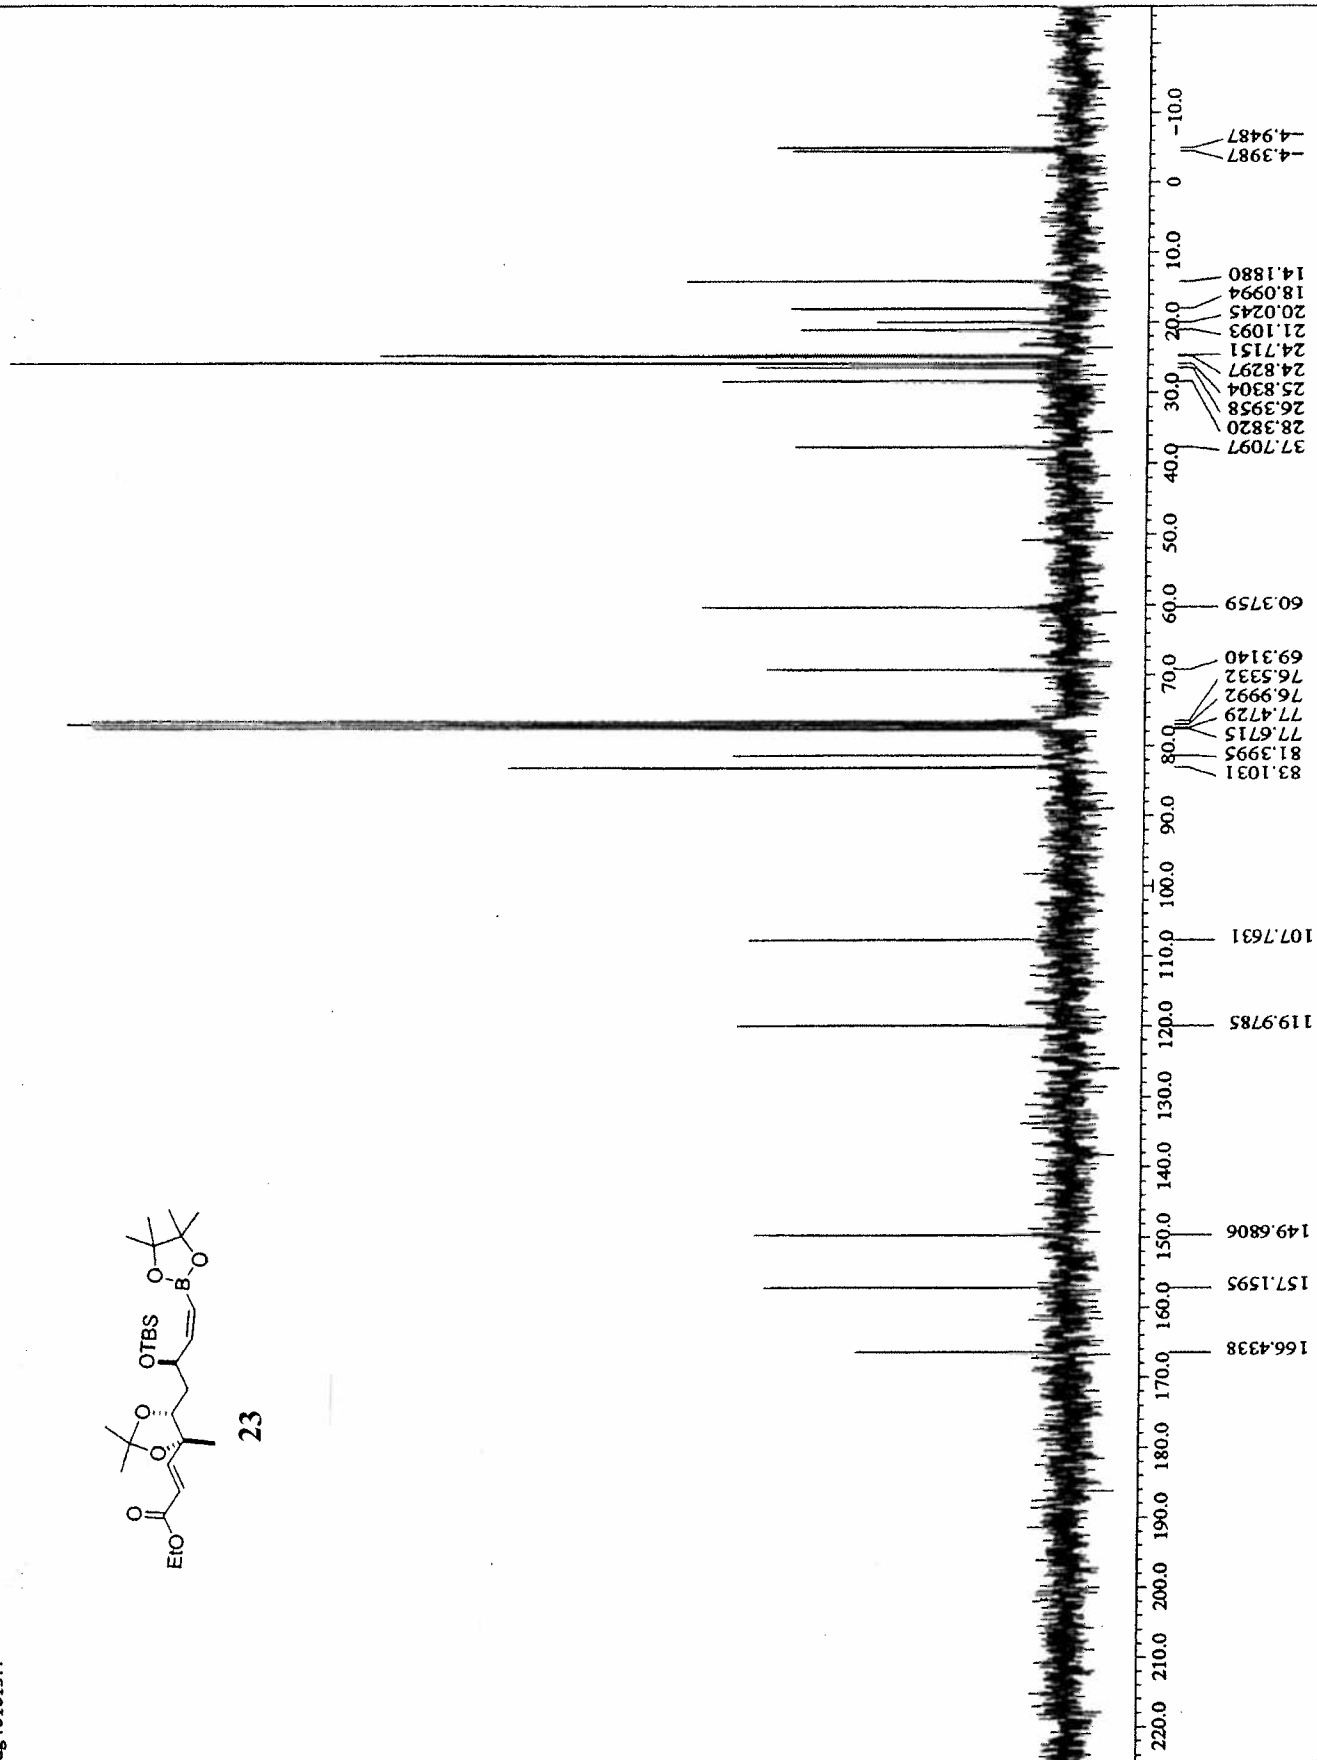

X : parts per Million : 13C

dg461.4

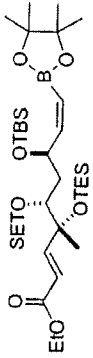

25a

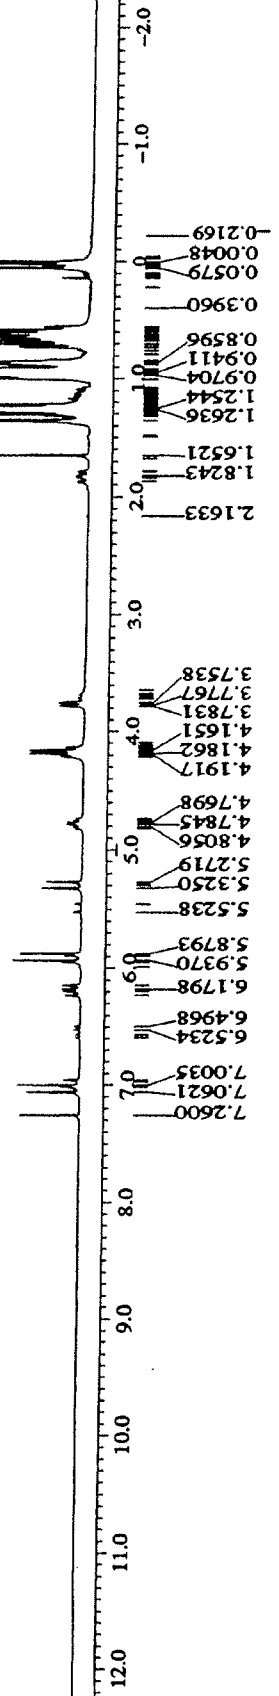

X : parts per Million : 1H

dg461c13.4

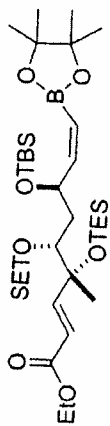

25a

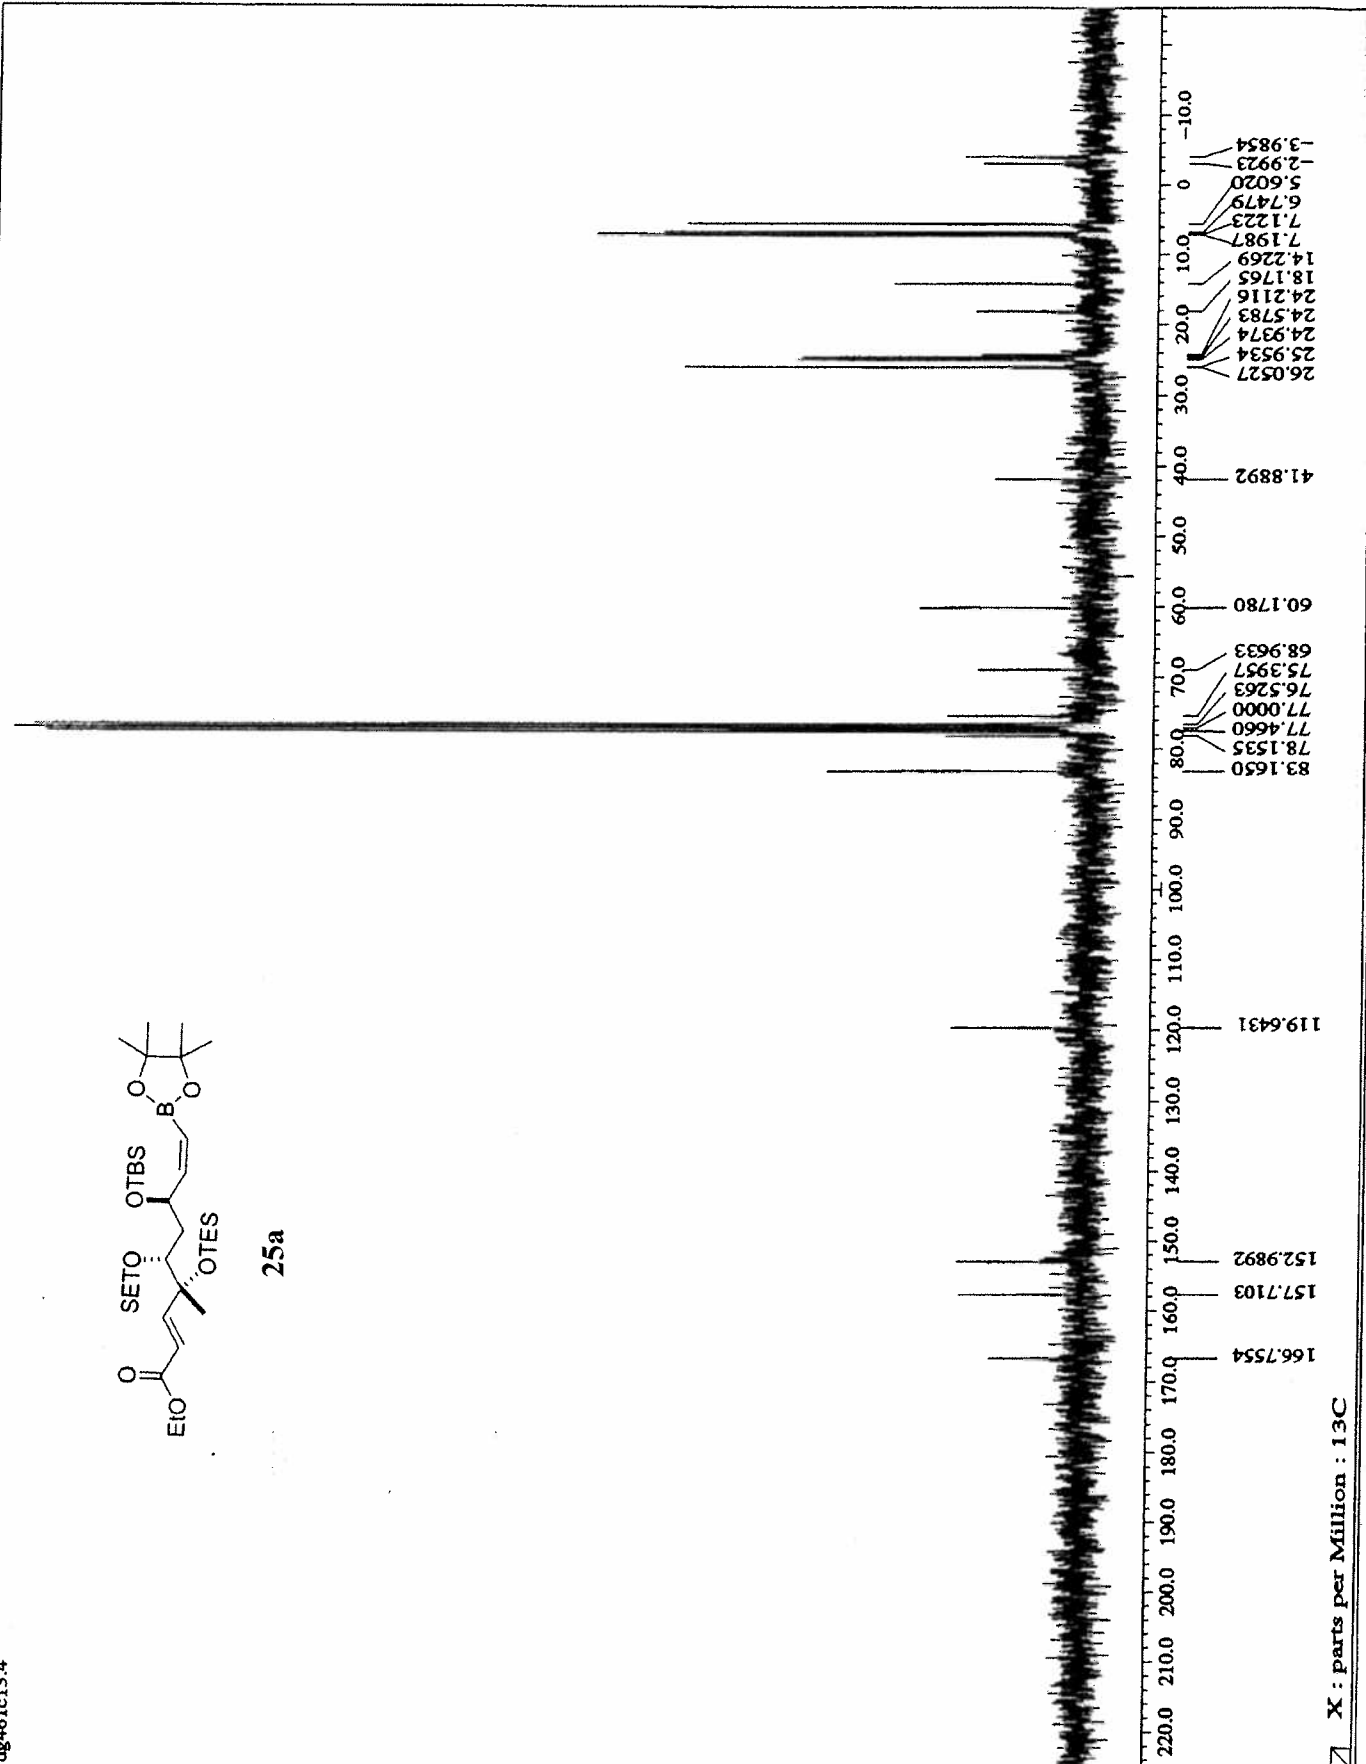

X : parts per Million : 13C

dg462.3

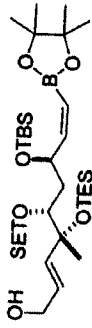

26a

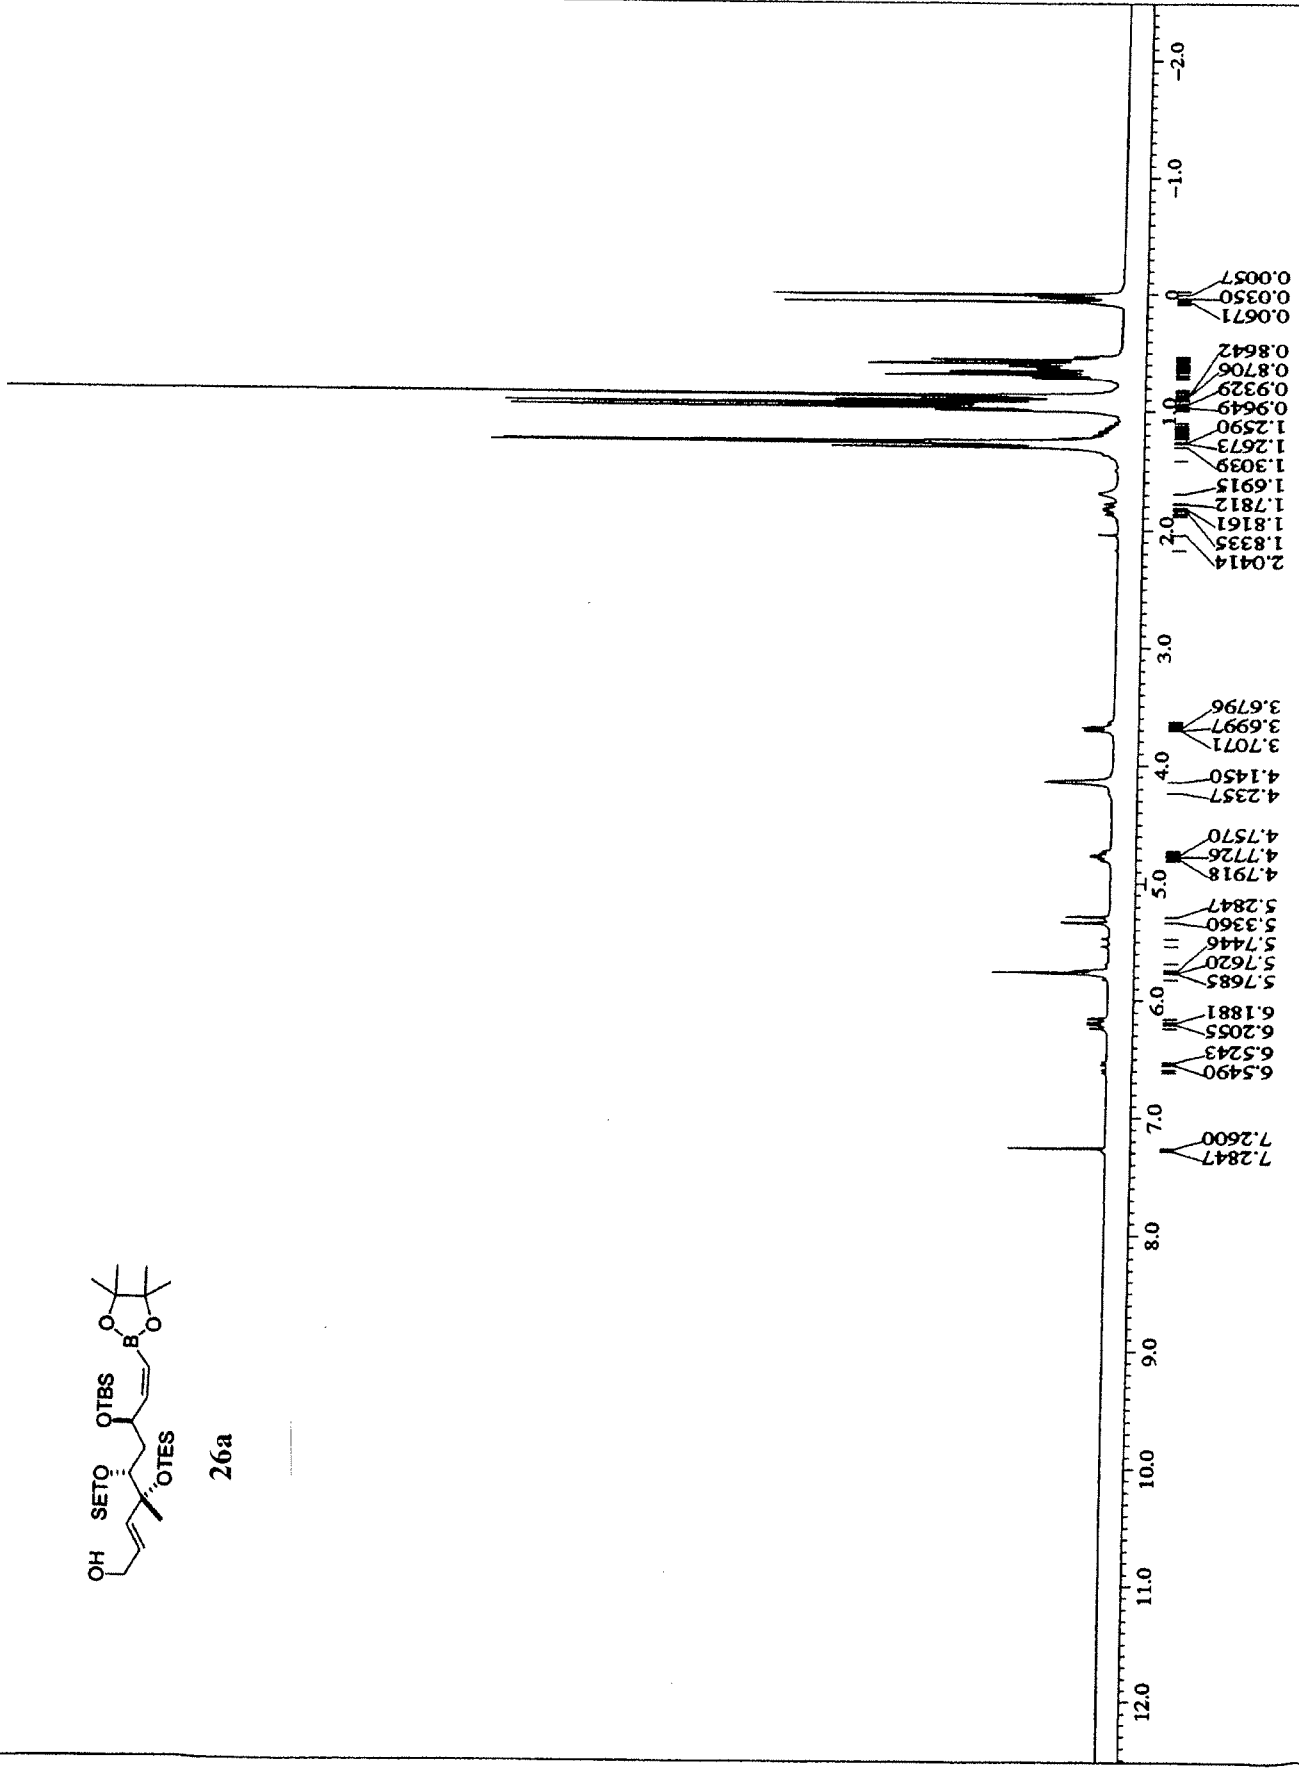

X : parts per Million : 1H



dg462-c13.3

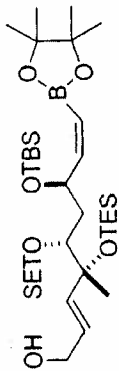

26a

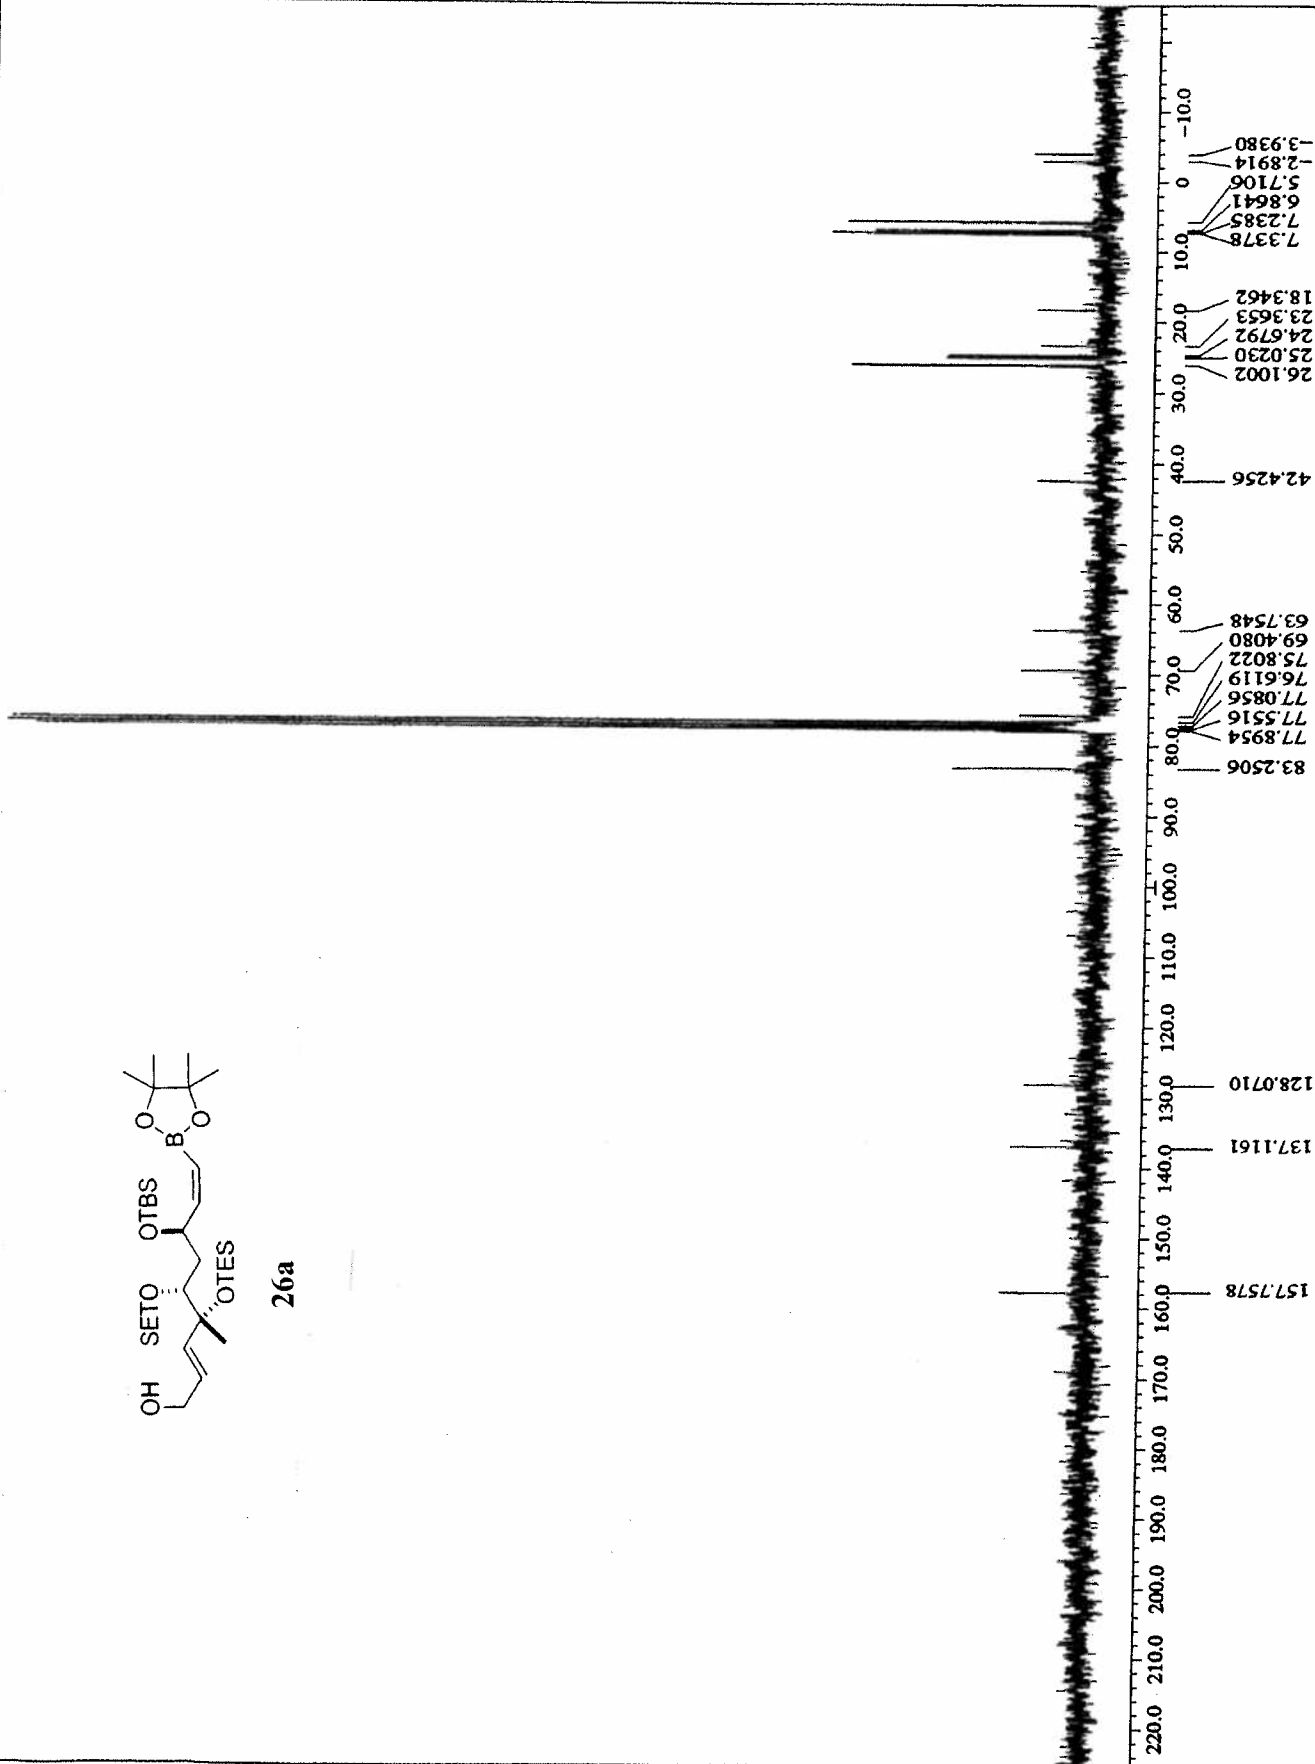

X : parts per Million : 13C

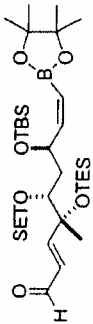

27

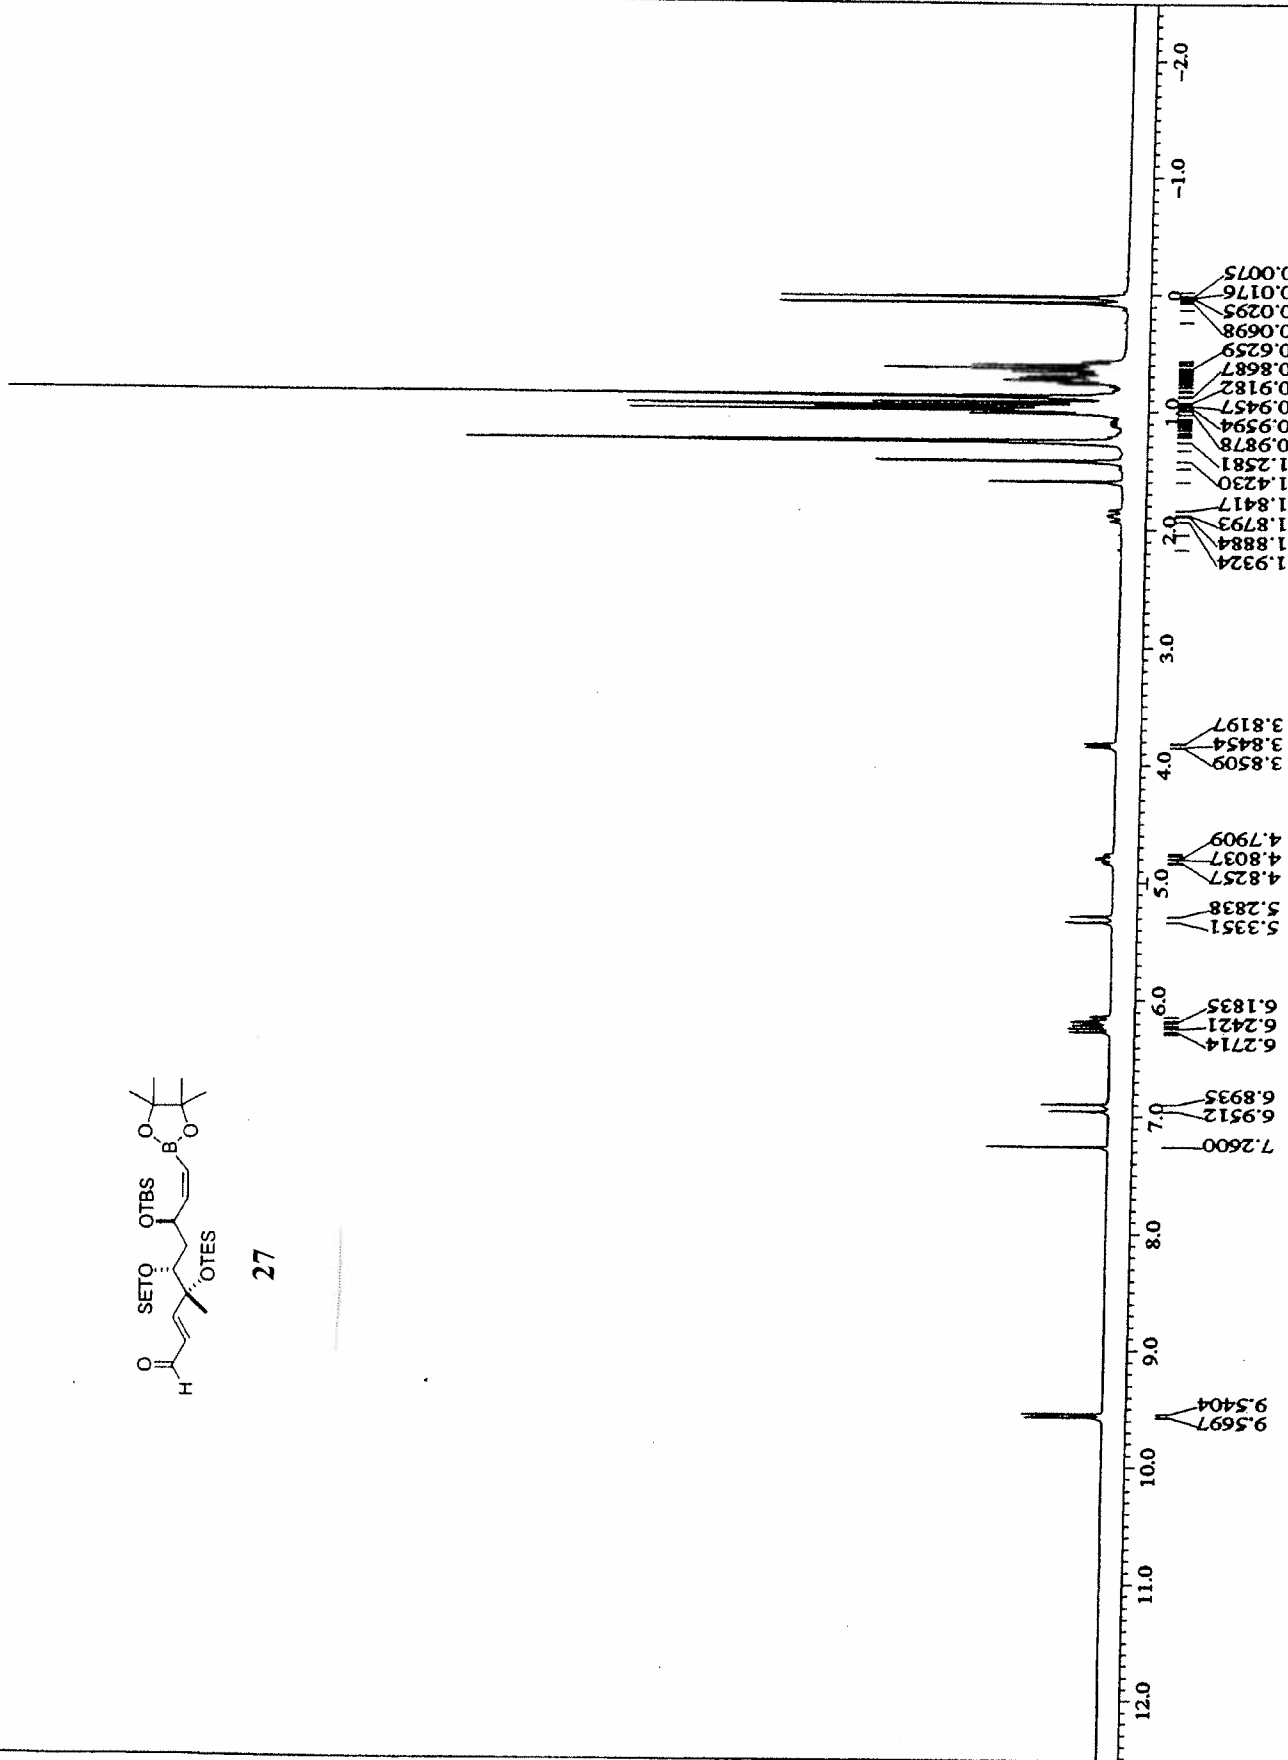

X : parts per Million :  $^1\text{H}$

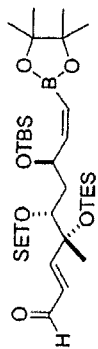

27

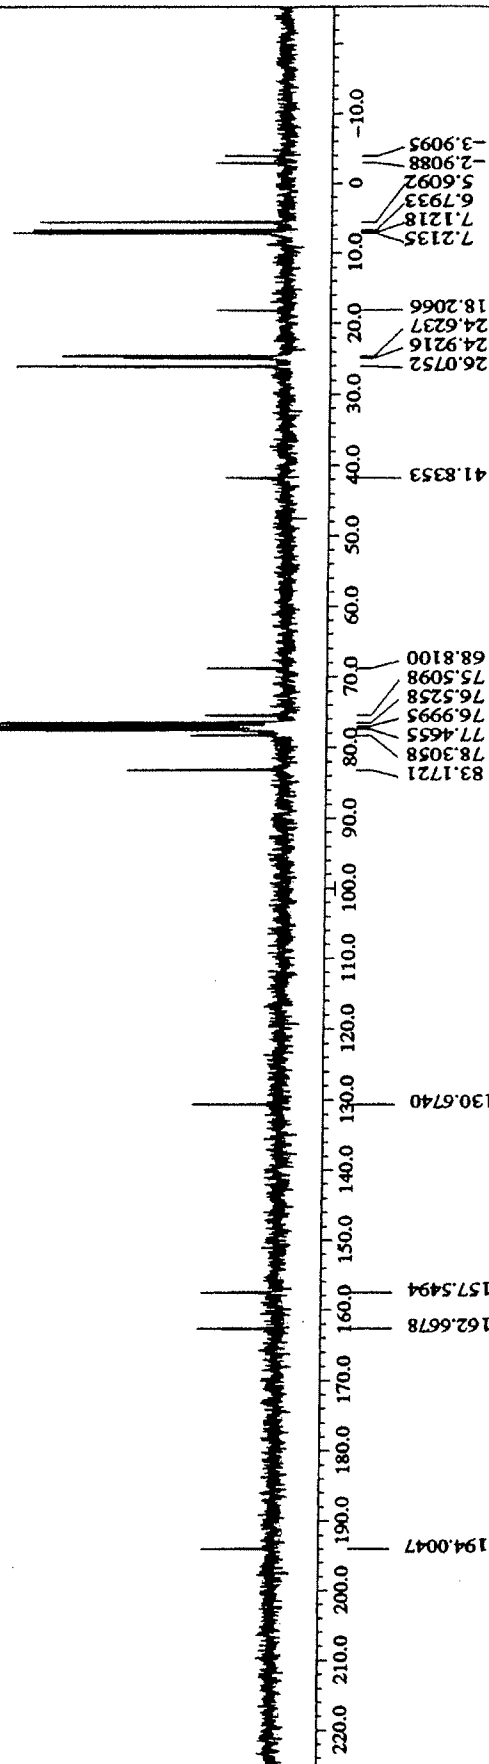

X : parts per Million : 13C

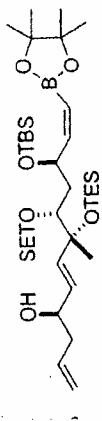

29

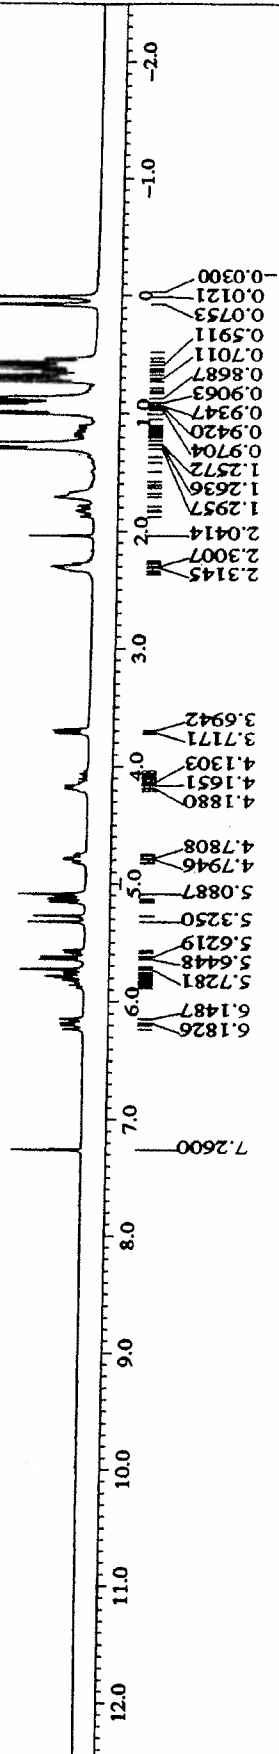

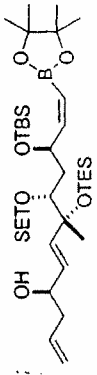

29

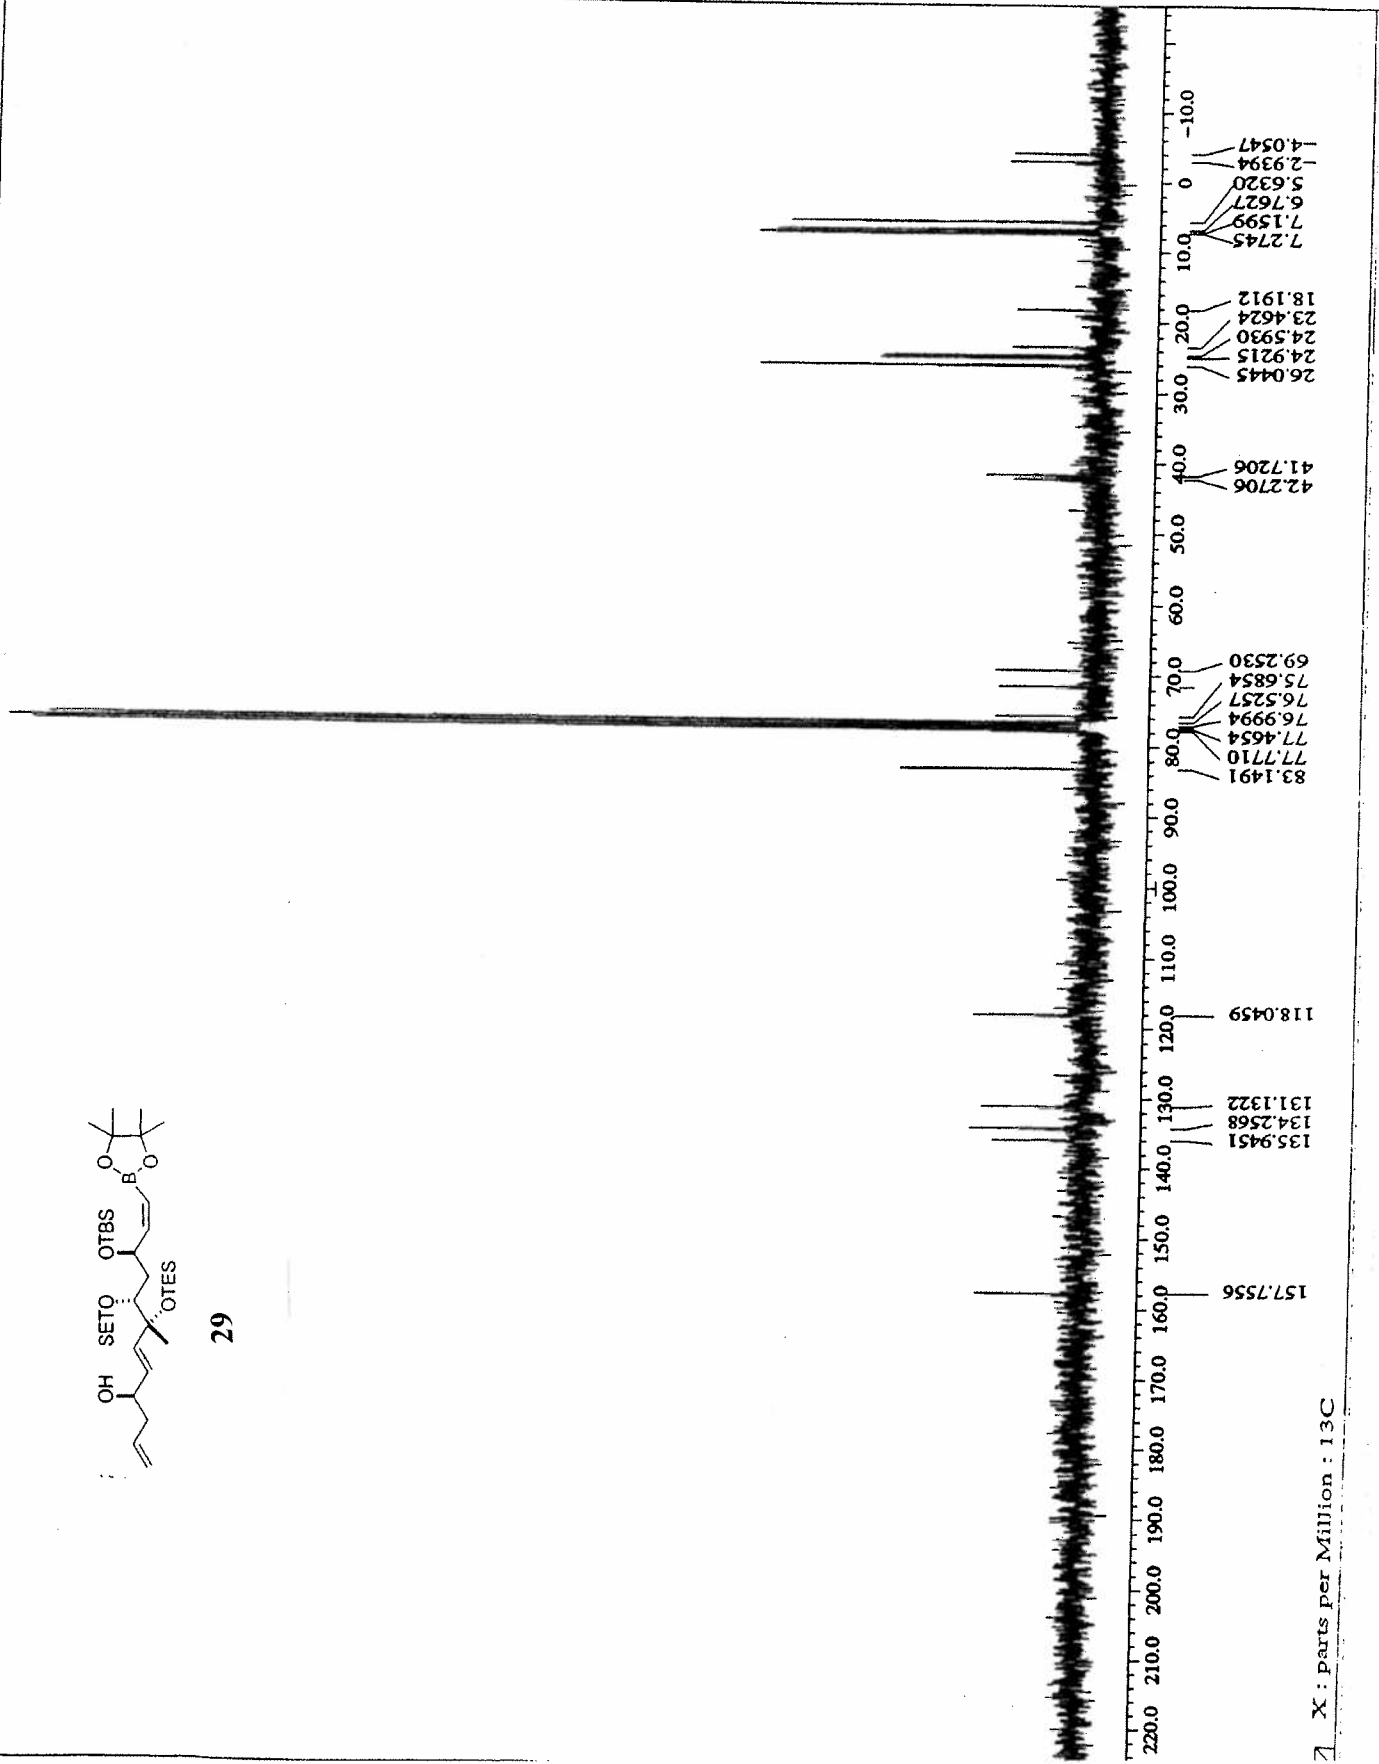

STANDARD PROTON PARAMETERS

Archive directory: /export/home/vnari/vnarsys/data  
Sample directory:  
File: PROTON

Pulse Sequence: s2pu1

Solvent: CDCl3  
Temp: 20.0 C / 301.1 K  
INOVA-600 "Inova600"

Relax. delay 1.800 sec  
Pulse 30.0 degrees  
Acq. time 4.800 sec  
Width 9594.6 Hz  
Single scan

OBSERVE H1, 599.6669971 MHZ  
DATA PROCESSING  
FT size 131072  
Total time 0 min, 5 sec

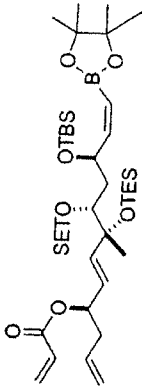

30

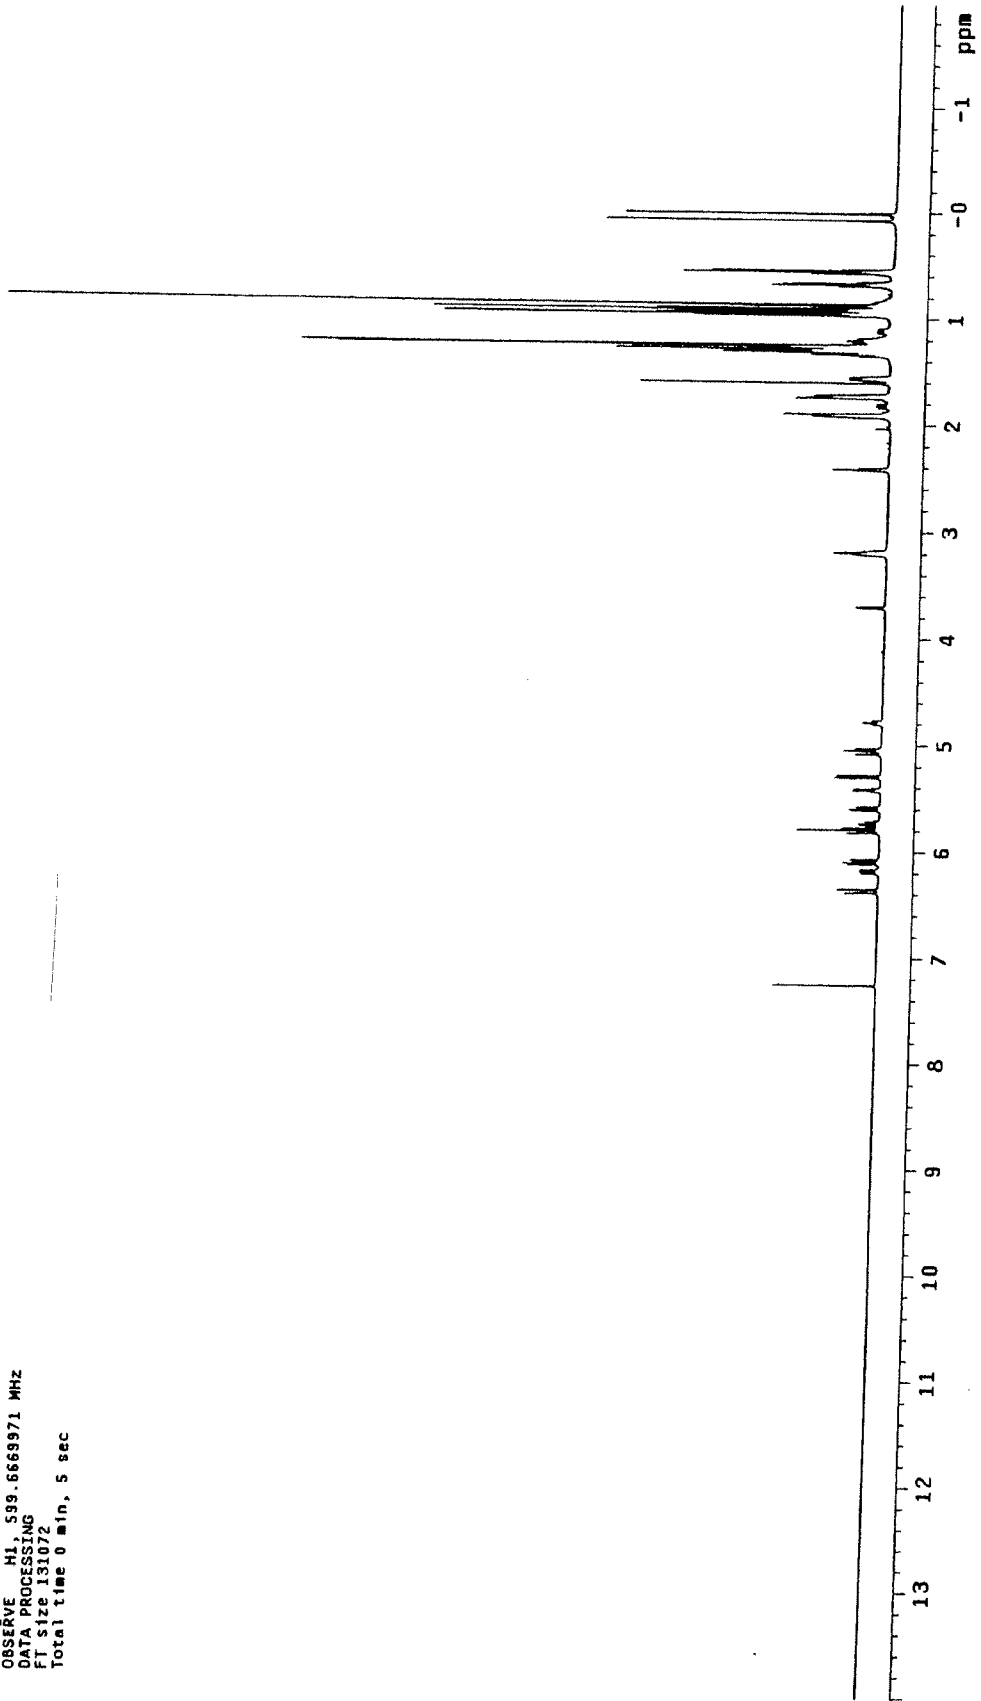

STANDARD CARBON PARAMETERS

Pulse Sequence: szpu1  
Solvent: CDCl3  
Temp: 28.0 C / 301.1 K  
User: 1-14-87 / 301.1 K  
INOVA-600 "inova600"  
Relax. delay 0.500 sec  
Pulse 29.9 degrees  
Acq. time 1.400 sec  
Width 36003.6 Hz  
416 repetitions  
OBSERVE C13, 150.7863845 MHz  
DECOUPLE H1, 595.6780024 MHz  
Power 40 dB  
continuously on  
WALTZ-16 modulated  
DATA PROCESSING  
FT size 131072  
Total time 32 min, 34 sec

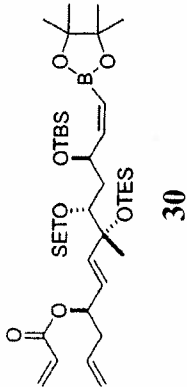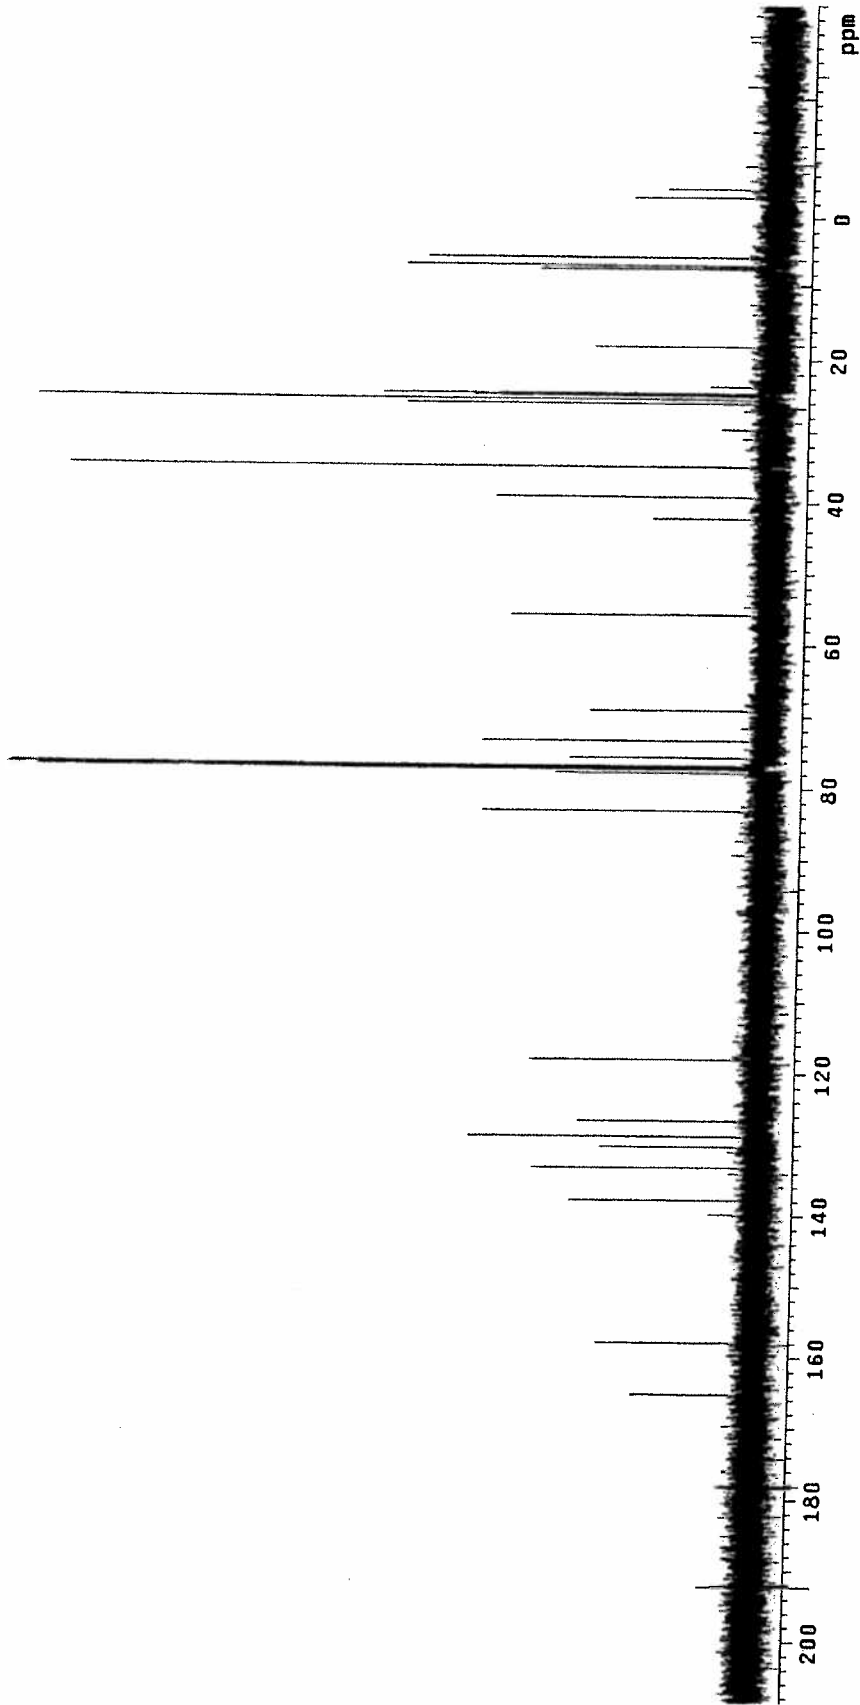

STANDARD PROTON PARAMETERS

Archive directory: /export/home/vnari/vnarsys/data  
 Sample directory:  
 File: PROTON

Pulse Sequence: s2pul

Solvent: CDCl3  
 Temp: 28.0 C / 301.1 K  
 INOVA-600 "inova600"

Relax. delay 1.000 sec  
 Pulse 30.0 degrees  
 Acq. time 4.000 sec  
 Width 9594.6 Hz  
 16 repetitions

OBSERVE H1, 599.5669967 MHz  
 DATA PROCESSING  
 FT size 131072  
 Total time 1 min, 20 sec

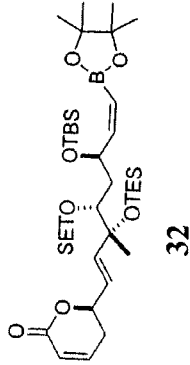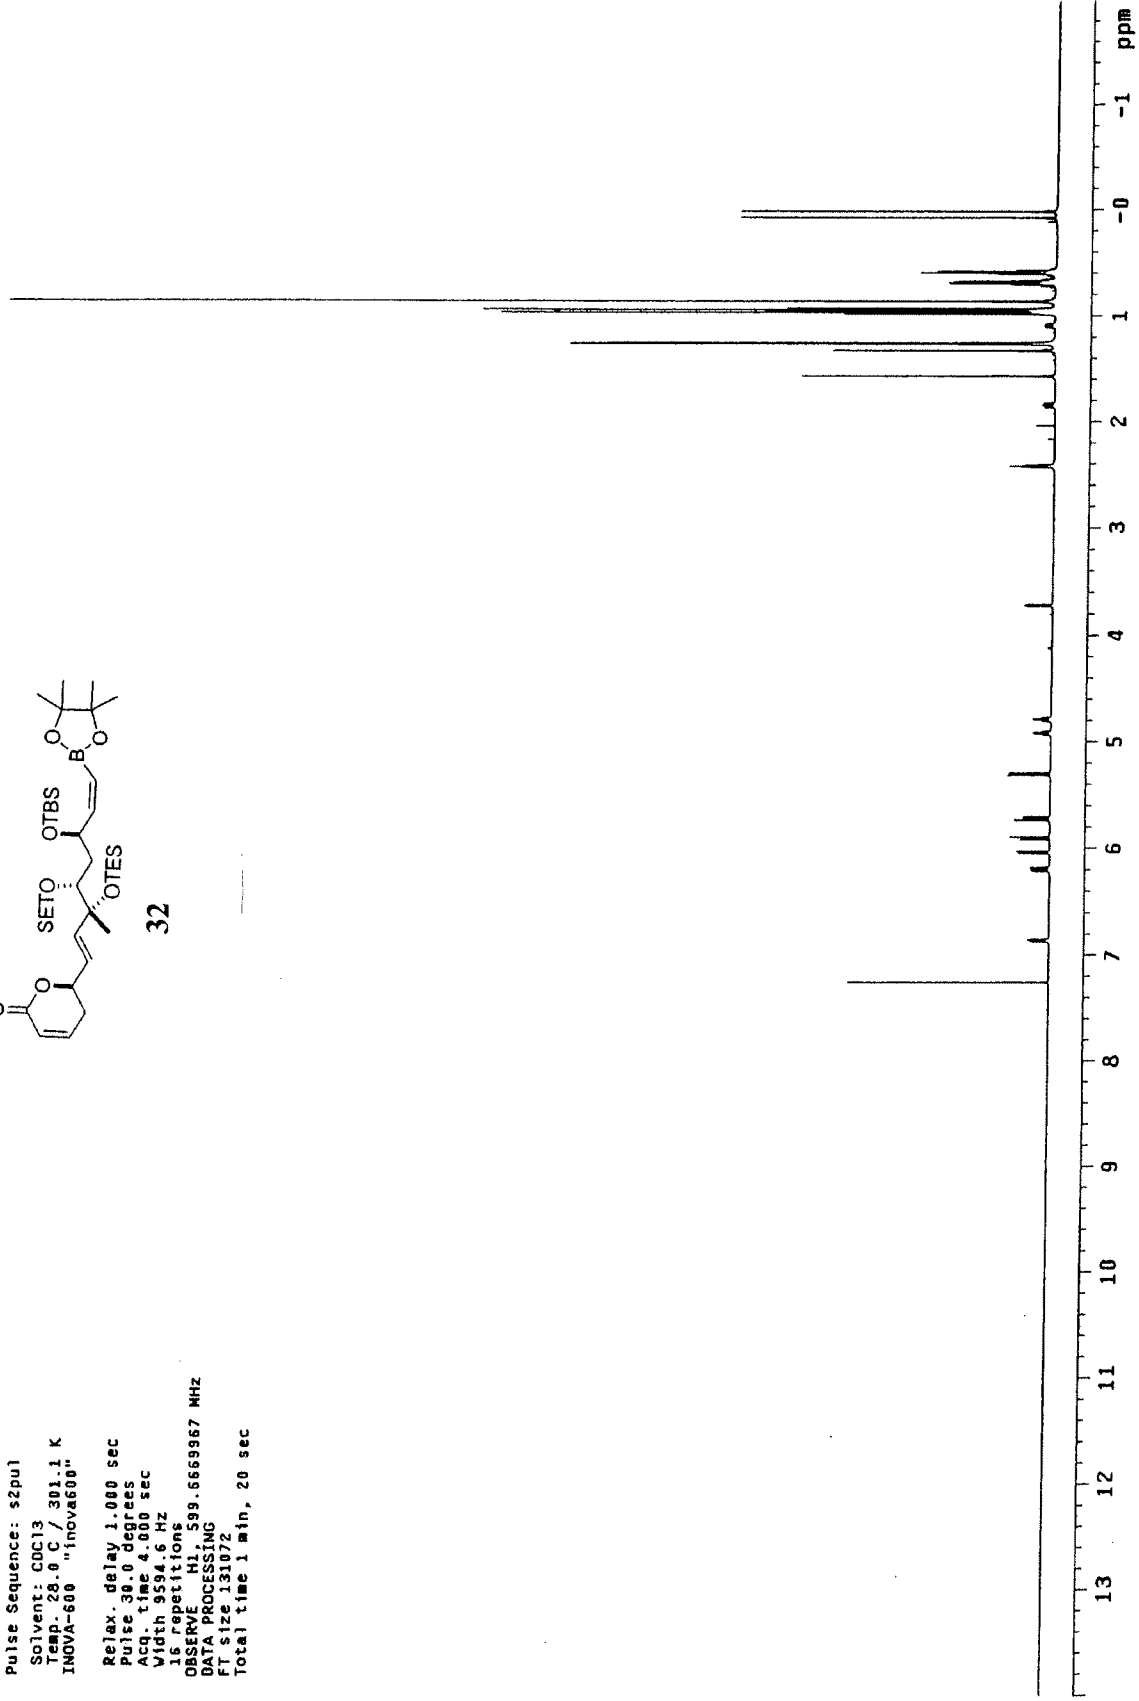



STANDARD CARBON PARAMETERS

Pulse Sequence: s2pu1

Solvent: CDCl3  
 Temp. 26.0 C / 301.1 K  
 User: I-14-87  
 INOVA-600 "inova600"

Relax. delay 0.500 sec  
 Pulse 29.5 degrees  
 Acq. time 1.400 sec  
 Width 38003.6 Hz  
 784 repetitions

OBSERVE C13, 150.7863841 MHz  
 DECOUPLE H1, 599.6780024 MHz

Power 40 dB  
 continuously on  
 WALTZ-16 modulated  
 DATA PROCESSING

FT size 131072  
 Total time 32 min, 34 sec

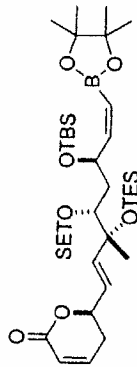

32

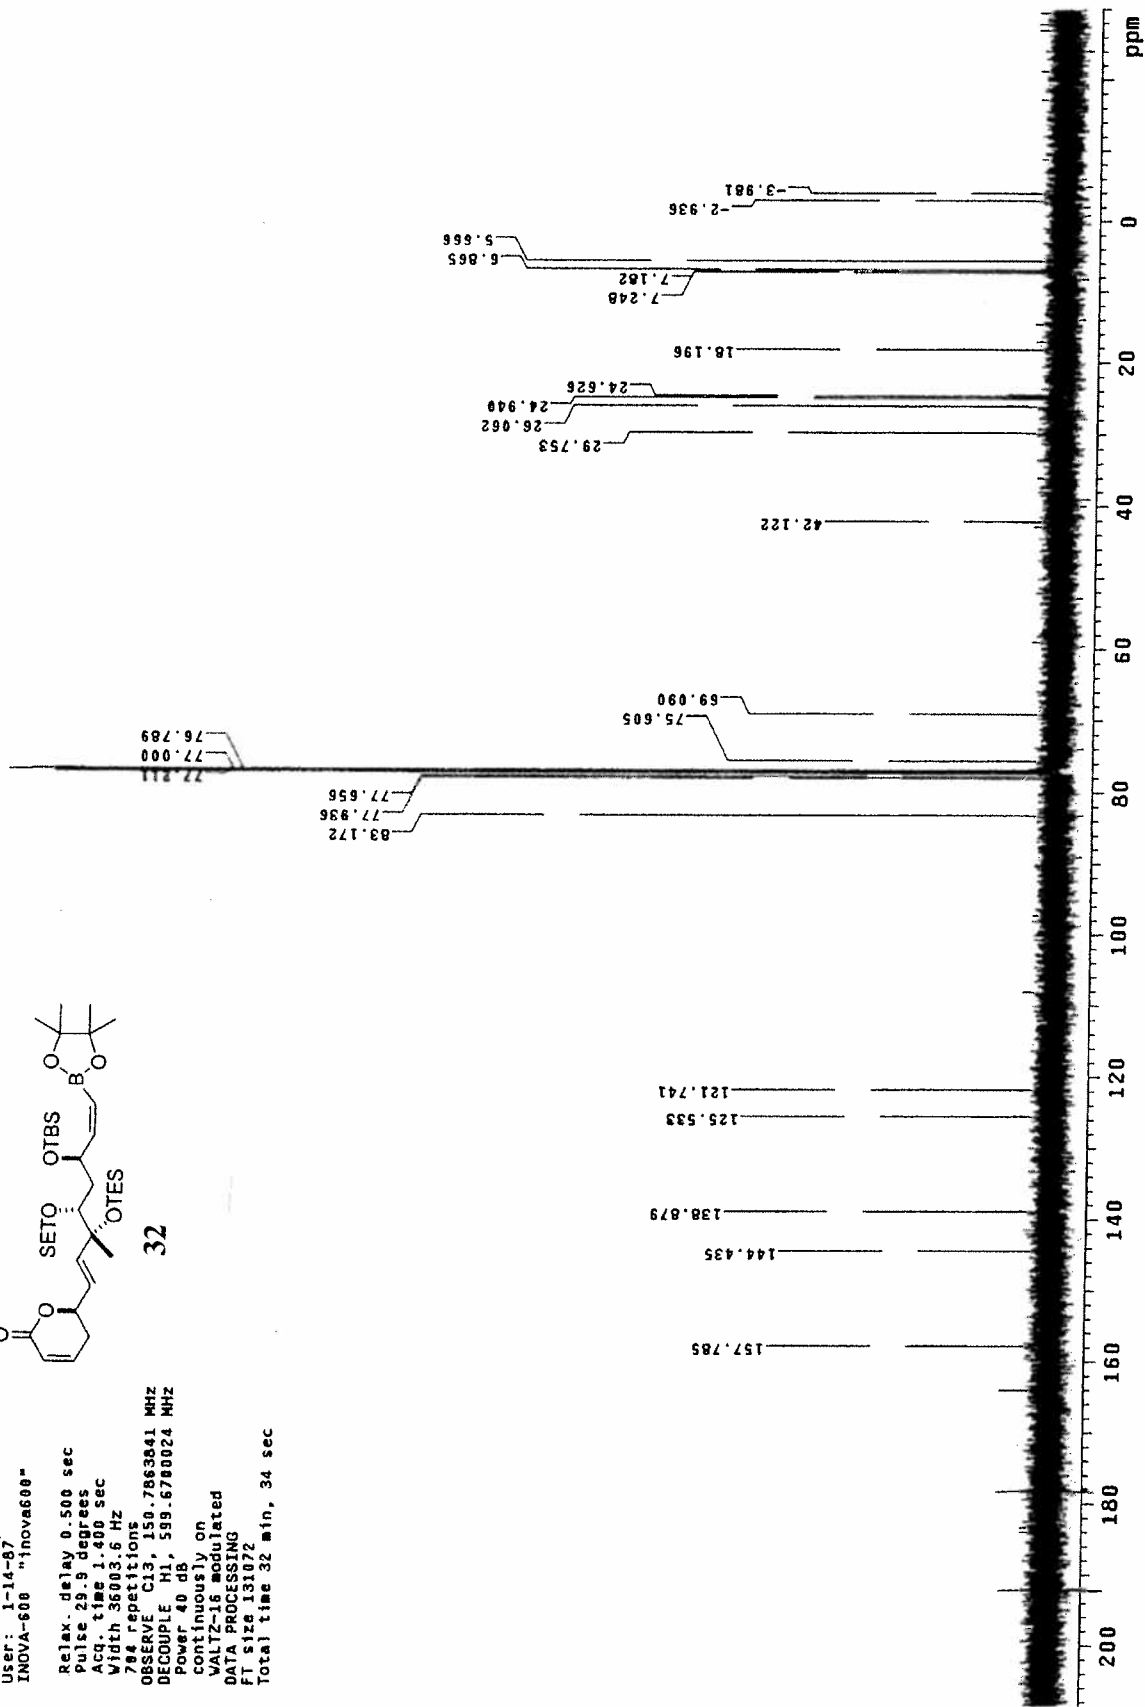

STANDARD PROTON PARAMETERS

Archive directory: /export/home/vnari/  
Sample directory:  
File: PROTON

Pulse Sequence: szpu1

Solvent: CDCl3  
Temp. 28.9 C / 301.1 K  
INOVA-600 "inovas00"

Relax. delay 1.000 sec

Pulse 30.0 degrees

Acq. time 4.800 sec

Width 9594.6 Hz

20 repetitions

OBSERVE H1 599.8669957 MHz

DATA PROCESSING

FI size 131072

Total time 1 min, 40 sec

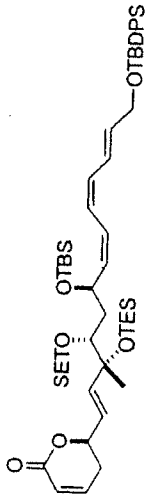

33

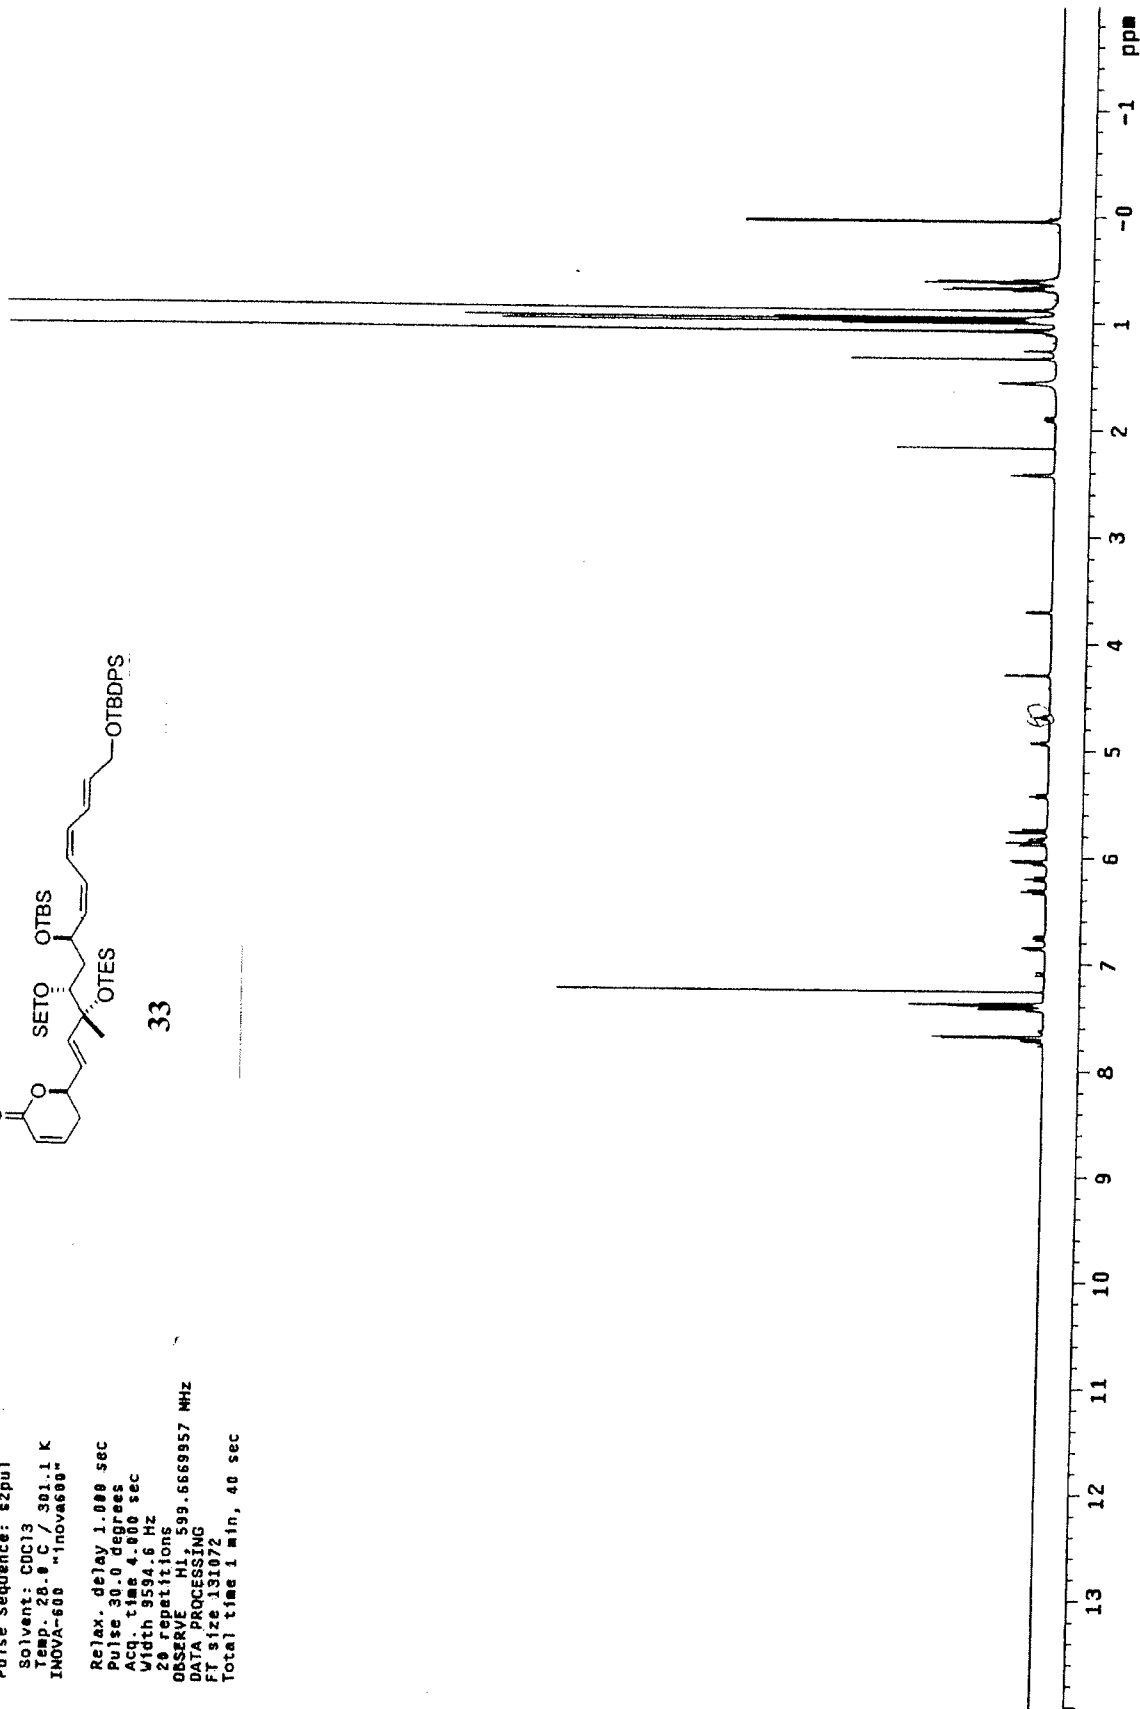

STANDARD CARBON PARAMETERS

Pulse Sequence: s2pu1

Solvent: CDCl3  
Temp. 28.0 C / 301.1 K  
User: j-14-87  
INOVA-600 "inova600"

Relax. delay 0.500 sec  
Pulse 29.0 degrees  
Acq. time 1.808 sec  
Width 56993.6 Hz  
2896 repetitions  
OBSERVE C13, 150.7663641 MHZ  
DECOUPLE H1, 599.6780024 MHZ  
Power 48 dB  
Continuously on  
WALTZ-16 modulated  
DATA PROCESSING  
FT size 131872  
Total time 5 hr, 18 min, 9 sec

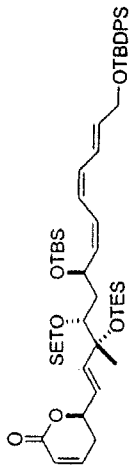

33

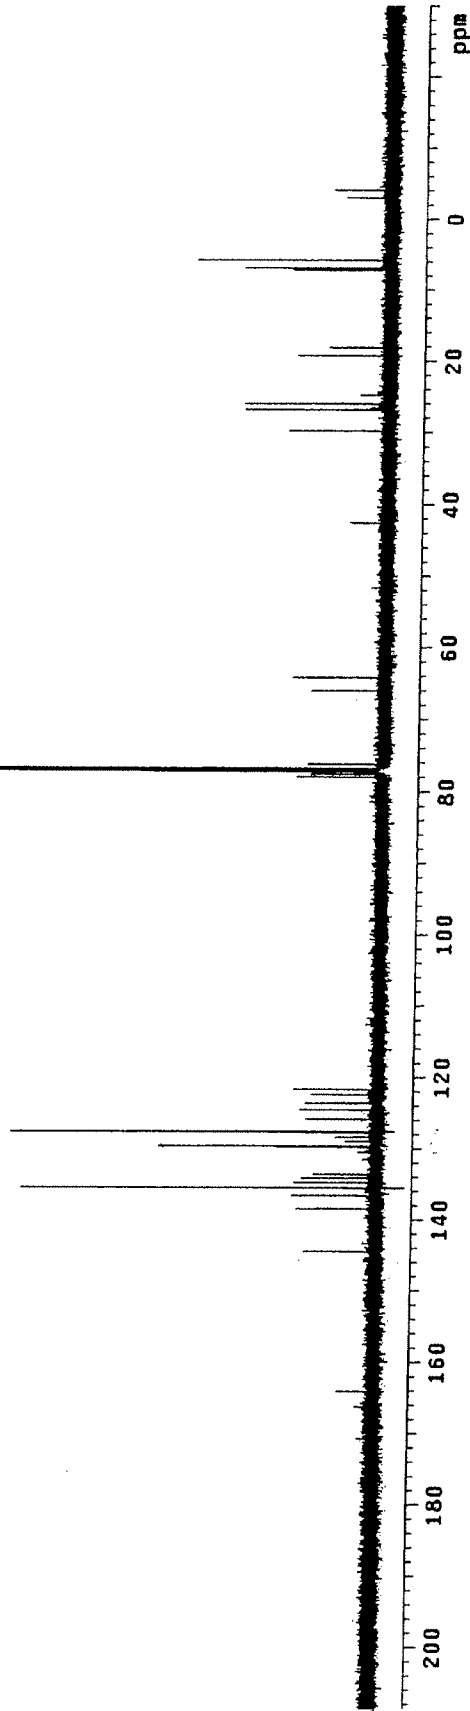

STANDARD PROTON PARAMETERS

Archive directory: /export/home/vnmr1/vnarsys/data  
Sample directory:  
File: PROTON

Pulse Sequence: s2pu1  
Solvent: CDCl3  
Temp. 28.8 C / 301.1 K  
INOVA-600 "inova600"

Relax. delay 1.000 sec  
Pulse 30.0 degrees  
Acq. time 4.000 sec  
Width 9594.6 Hz  
16 repetitions  
OBSERVE H1, 599.6669942 MHz  
DATA PROCESSING  
Line broadening 0.2 Hz  
FT size 131072  
Total time 1 min, 20 sec

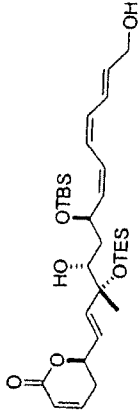

34

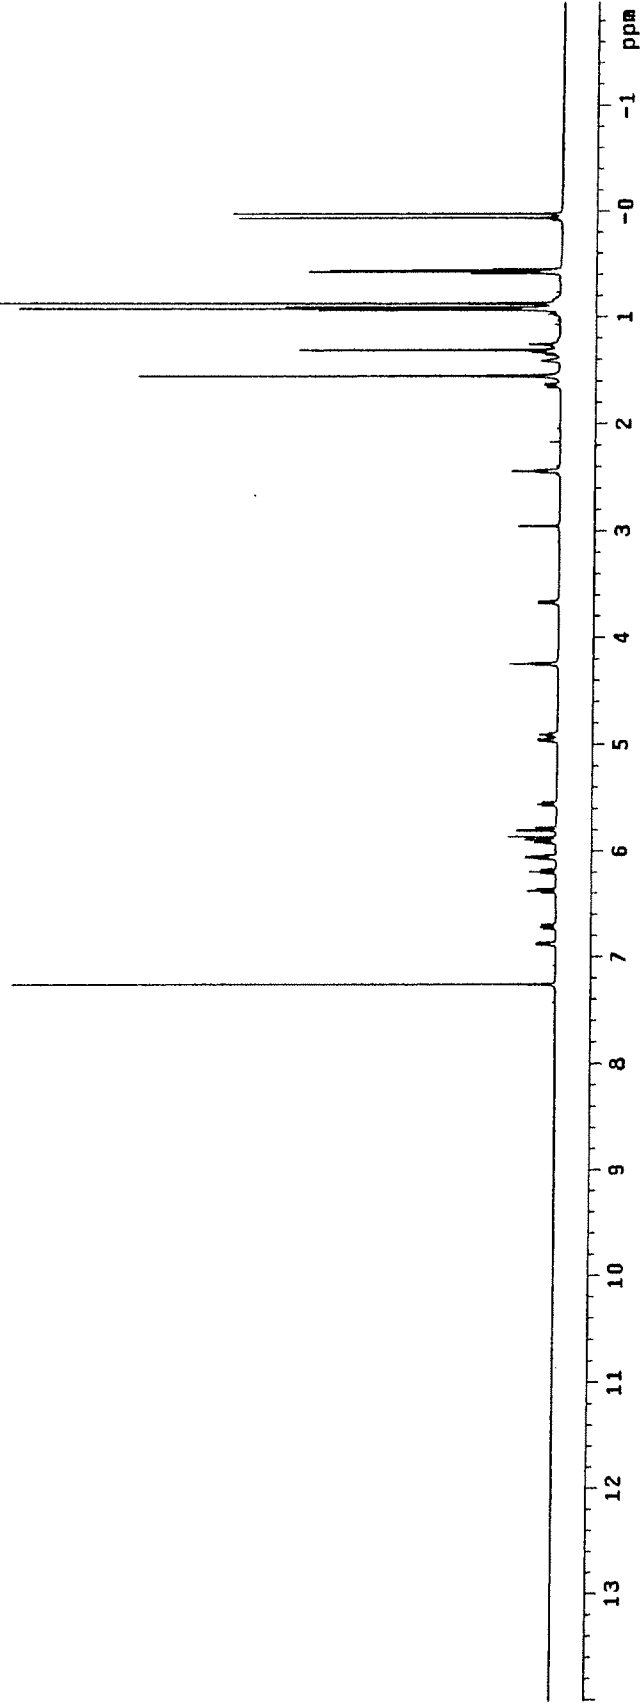

STANDARD CARBON PARAMETERS.

Pulse Sequence: s2pul  
 Solvent: CDCl3  
 Temp. 26.0 C / 301.1 K  
 User: 1-14-87  
 INOVA-600 "Inova600"

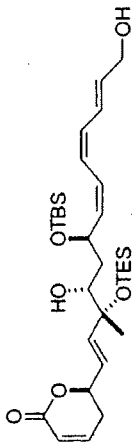

34

Relax. delay 0.500 sec  
 Pulse 23.9 degrees  
 Acq. time 1.400 sec  
 Width 38803.6 Hz  
 1600 repetitions  
 OBSERVE C13, 159.7863521 MHz  
 DECOUPLE H1, 599.6700824 MHz  
 Power 48 dB  
 continuously on  
 WALTZ-16 modulated  
 DATA PROCESSING  
 Line broadening 1.0 Hz  
 FT size 131072  
 Total time 5 hr, 18 min, 9 sec

76.994  
 77.416  
 77.205

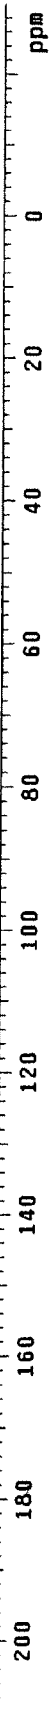

STANDARD PROTON PARAMETERS

Archive directory: /export/home/vnarl/vnarsys/data  
Sample directory:  
File: PROTON

Pulse Sequence: s2pul

Solvent: CDCl3  
Temp. 28.0 C / 301.1 K  
INOVA-600 "inova600"

Relax. delay 1.800 sec  
Pulse 30.0 degrees  
Acq. time 4.080 sec  
Width 9334.6 Hz

20 repetitions  
OBSERVE F1, 599.666943 MHz  
DATA PROCESSING  
Line broadening 0.2 Hz  
FT size 131072  
Total time 1 min, 40 sec

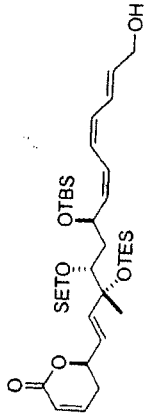

35

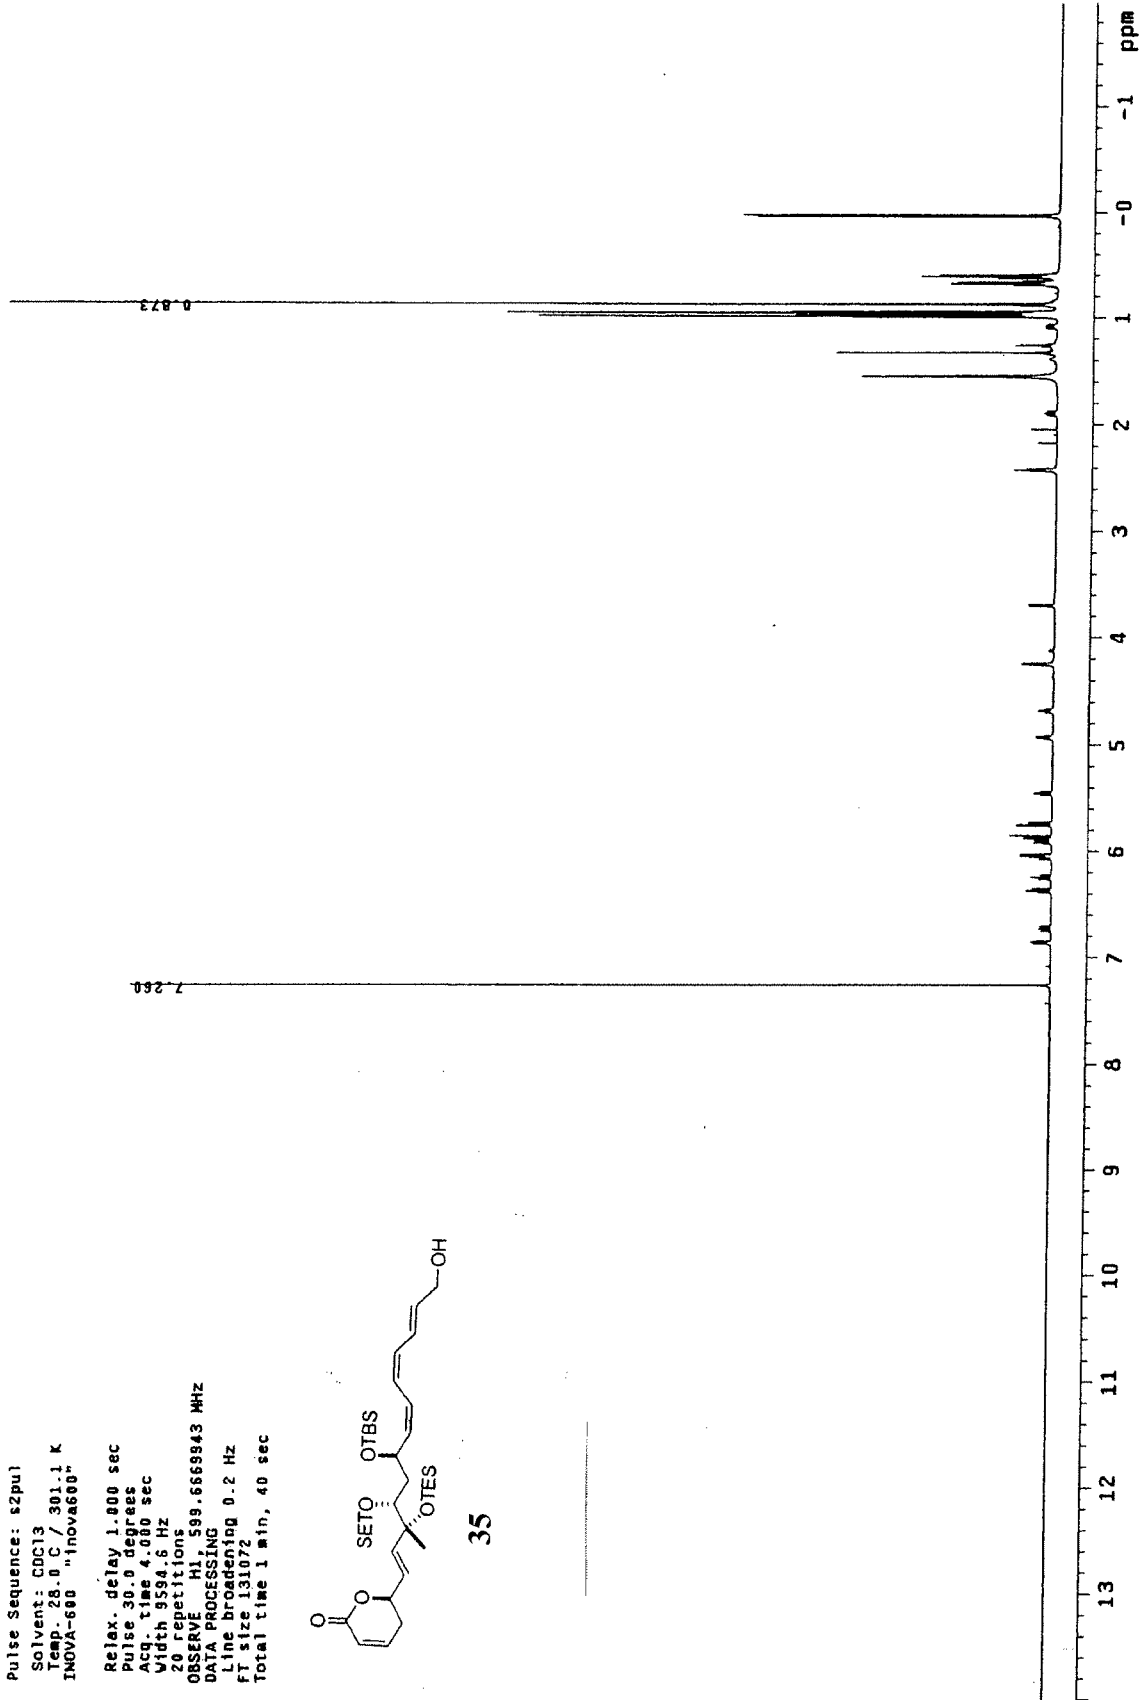

STANDARD CARBON PARAMETERS

Pulse Sequence: #2pul  
Solvent: CDCl3  
Temp. 28.0 C / 301.1 K  
User: 1-14-87  
INNOVA-600 "1nova600"  
Relax. delay 0.500 sec  
Pulse 29.9 degrees  
Acq. time 1.400 sec  
Width 36003.6 Hz  
736 repetitions  
OBSERVE C13, 150.7863630 MHZ  
DECOUPLE H1, 599.6700024 MHZ  
Power 40 dB  
continuously on  
WALTZ-16 modulated  
DATA PROCESSING  
Line broadening 1.0 Hz  
FT size 131072  
Total time 32 min, 34 sec

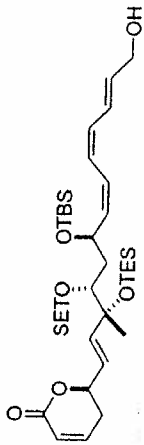

35

77.211  
77.000  
76.789

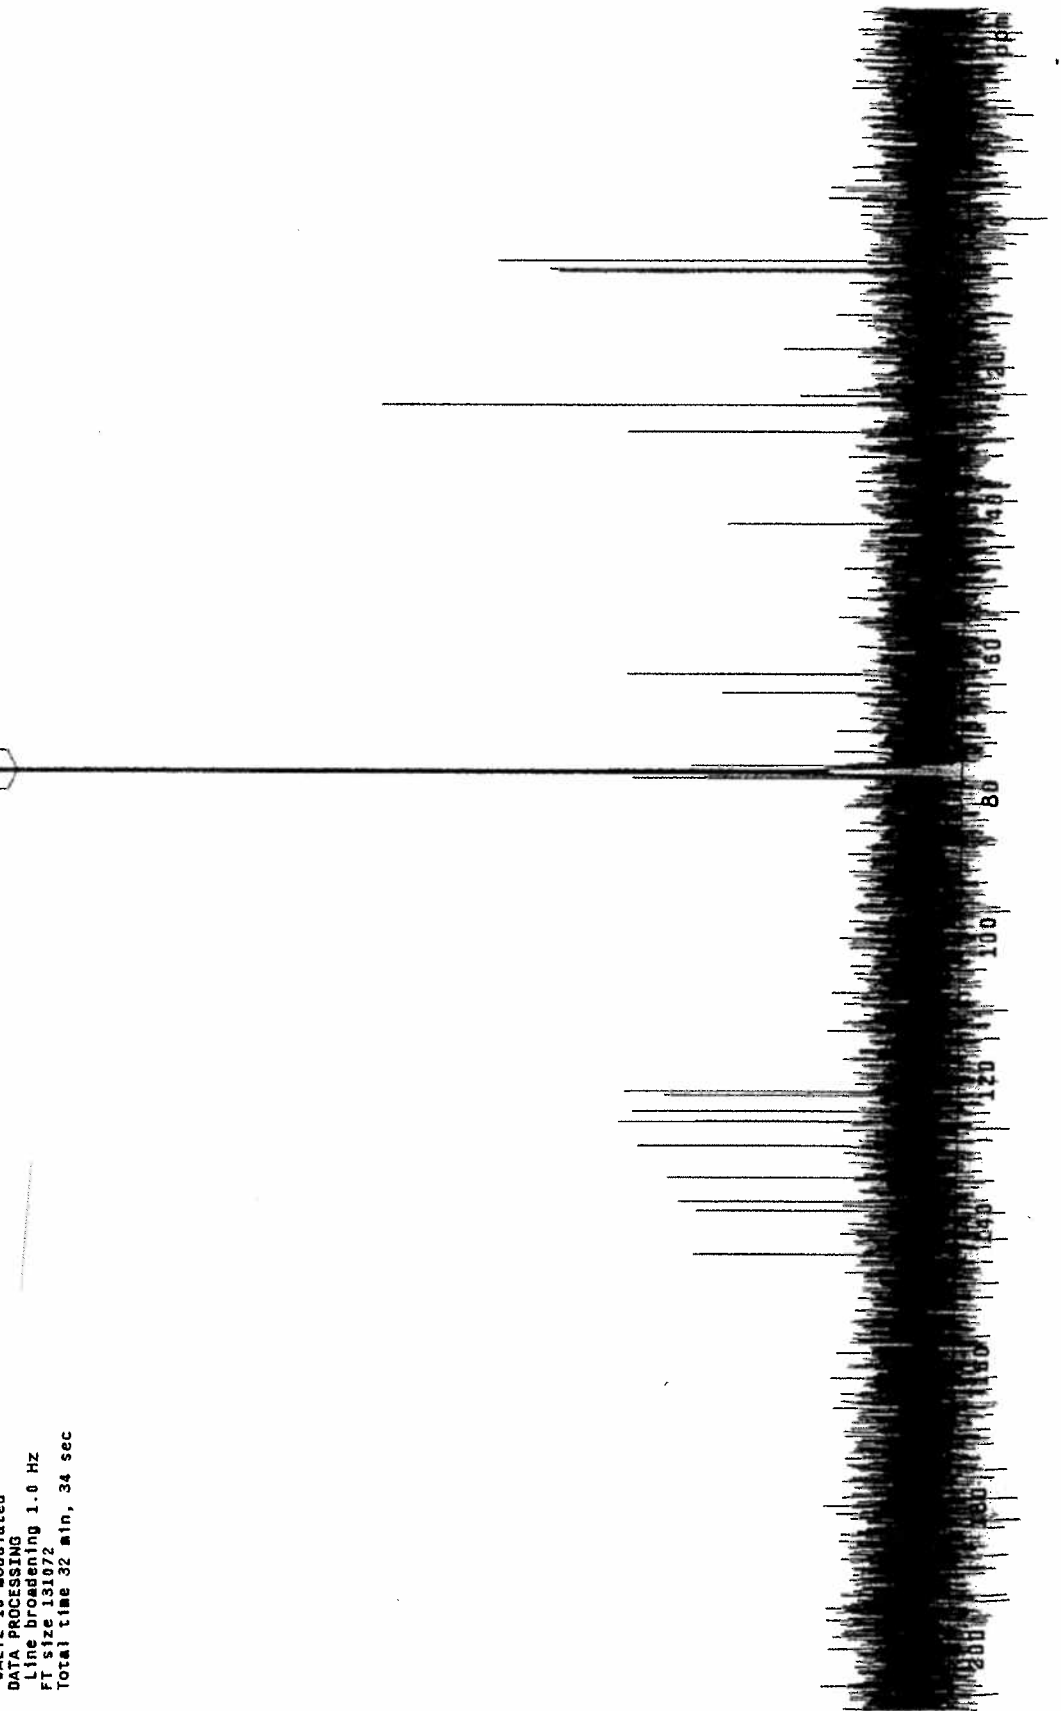

STANDARD PROTON PARAMETERS

Archive directory: /export/home/vnar1/vnarsys/data  
Sample directory:  
File: PROTON

Pulse Sequence: s2pu1

Solvent: CDCl3  
Temp. 25.0 C / 301.1 K  
INOVA-600 "inovas80"

Relax. delay 1.000 sec  
Pulse 30.0 degrees  
Acq. time 4.000 sec  
Width 8594.6 Hz  
20 Repetitions

OBSERVE H1 599.666945 MHz  
DATA PROCESSING  
Line broadening 0.2 Hz  
FT size 131072  
Total time 1 min, 40 sec

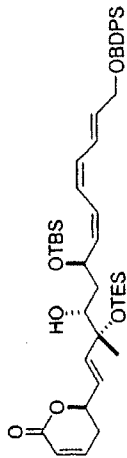

5

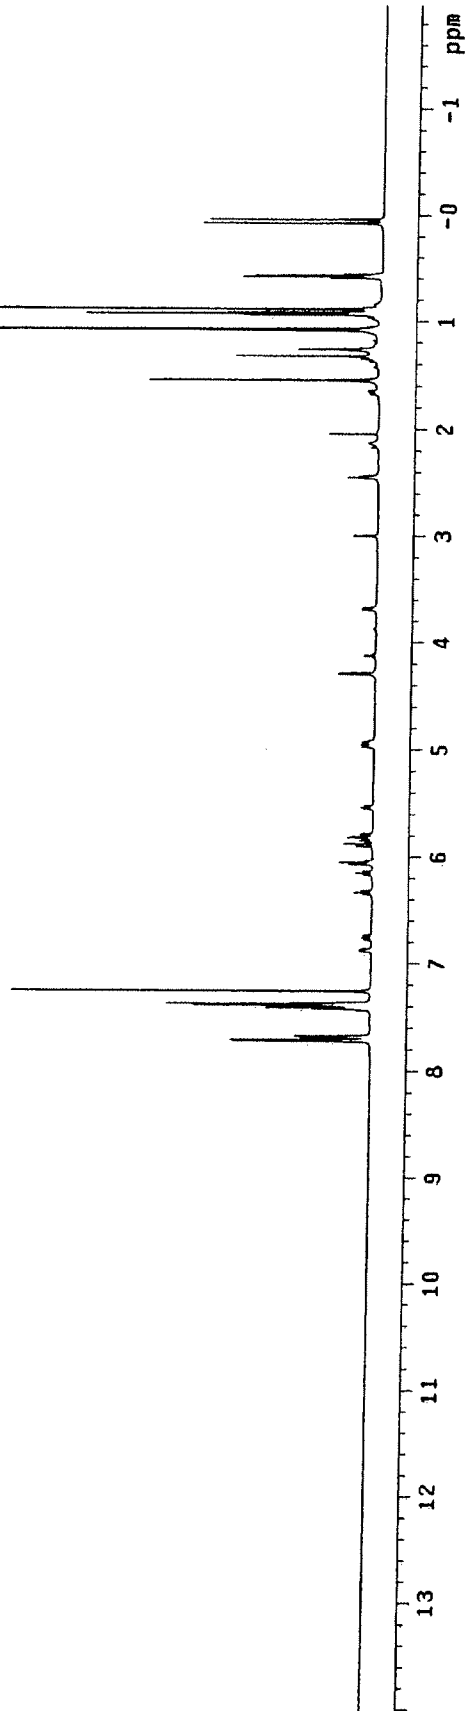



STANDARD CARBON PARAMETERS

Puls  
Sol  
Tem  
User  
INOV

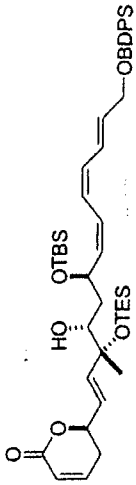

Rel. pulse 23.5  
Acq. time 1.400 sec  
Width 38993.6 Hz  
4256 repetitions  
OBSERVE C13, 158.786  
DECUPLE H1, 599.670024 MHz  
Power 40 dB  
continuously on  
WALTZ-16 modulated  
DATA PROCESSING  
Line broadening 1.0 Hz  
FT size 131072  
Total time 10 hr. 36 min. 18 sec

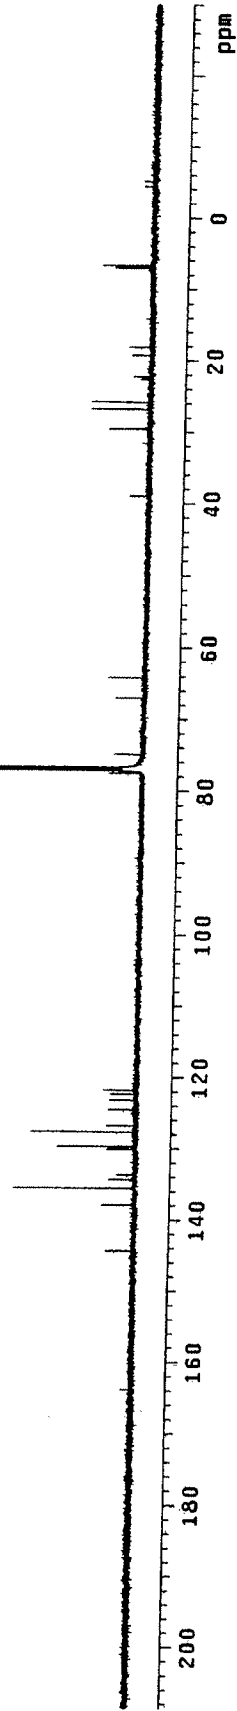

STANDARD PROTON PARAMETERS

Archive directory: /export/ho  
Sample directory:  
File: PROTON

Pulse Sequence: s2pul

Solvent: D2O  
Temp. 28.0 C / 301.1 K  
INOVA-600 "inova600"

Relax. delay 1.000 sec  
Pulse 30.0 degrees  
Acq. time 4.000 sec  
Width 9594.6 Hz  
256 repetitions

OBSERVE H1, 599.6684447 MHz  
DATA PROCESSING  
Line broadening 0.2 Hz  
FT size 131072  
Total time 21 min, 22 sec

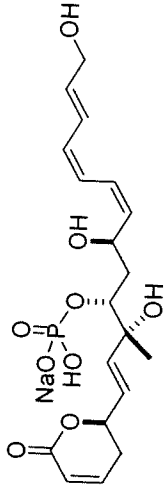

1

4.834  
4.800

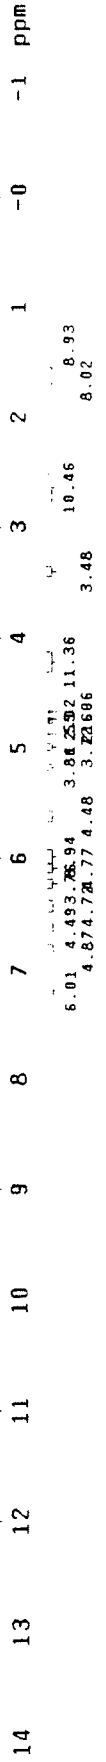

Supplement: NIHMS227194-supplement-1_si_001.pdf [file NIHMS227194-supplement-1_si_001.pdf]
